# Supplementary material for: Association between chronic obstructive pulmonary disease and periodontal disease: a systematic review and meta-analysis
Source: PubMed Central journal article supplement — BMJ Open. 2023 Jun 26;13(6):e067432. doi: 10.1136/bmjopen-2022-067432 (PMC10410961; doi:10.1136/bmjopen-2022-067432), 2023-06-26
Supplement: bmjopen-2022-067432.draft_revisions.pdf [file bmjopen-2022-067432.draft_revisions.pdf]

# BMJ Open

BMJ Open is committed to open peer review. As part of this commitment we make the peer review history of every article we publish publicly available.

When an article is published we post the peer reviewers' comments and the authors' responses online. We also post the versions of the paper that were used during peer review. These are the versions that the peer review comments apply to.

The versions of the paper that follow are the versions that were submitted during the peer review process. They are not the versions of record or the final published versions. They should not be cited or distributed as the published version of this manuscript.

BMJ Open is an open access journal and the full, final, typeset and author-corrected version of record of the manuscript is available on our site with no access controls, subscription charges or pay-per-view fees (<http://bmjopen.bmj.com>).

If you have any questions on BMJ Open's open peer review process please email [info.bmjopen@bmj.com](mailto:info.bmjopen@bmj.com)

# BMJ Open

## Association of periodontal disease with COPD risk and clinical events: a systematic review and meta-analysis

|                               |                                                                                                                                                                                                                                                                                                                                                                                                                                                                                                                                                                                                                                                                                                             |
|-------------------------------|-------------------------------------------------------------------------------------------------------------------------------------------------------------------------------------------------------------------------------------------------------------------------------------------------------------------------------------------------------------------------------------------------------------------------------------------------------------------------------------------------------------------------------------------------------------------------------------------------------------------------------------------------------------------------------------------------------------|
| Journal:                      | <i>BMJ Open</i>                                                                                                                                                                                                                                                                                                                                                                                                                                                                                                                                                                                                                                                                                             |
| Manuscript ID                 | bmjopen-2022-067432                                                                                                                                                                                                                                                                                                                                                                                                                                                                                                                                                                                                                                                                                         |
| Article Type:                 | Original research                                                                                                                                                                                                                                                                                                                                                                                                                                                                                                                                                                                                                                                                                           |
| Date Submitted by the Author: | 15-Aug-2022                                                                                                                                                                                                                                                                                                                                                                                                                                                                                                                                                                                                                                                                                                 |
| Complete List of Authors:     | Yang, Mei; Sichuan University West China Hospital, Department of Respiratory and Critical Care Medicine<br>Peng, Ran; Sichuan University West China Hospital, Department of Respiratory and Critical Care Medicine; 363 Hospital, Department of Respiratory and Critical Care Medicine<br>Li, Xiaoou; Sichuan University West China Hospital, Department of Respiratory and Critical Care Medicine<br>Peng, Junjie; Sichuan University West China Hospital, Department of Respiratory and Critical Care Medicine<br>Liu, Lin; 363 Hospital, Department of Respiratory and Critical Care Medicine<br>Chen, Lei; Sichuan University West China Hospital, Department of Respiratory and Critical Care Medicine |
| Keywords:                     | Chronic airways disease < THORACIC MEDICINE, RESPIRATORY MEDICINE (see Thoracic Medicine), ORAL MEDICINE, Emphysema < THORACIC MEDICINE                                                                                                                                                                                                                                                                                                                                                                                                                                                                                                                                                                     |
|                               |                                                                                                                                                                                                                                                                                                                                                                                                                                                                                                                                                                                                                                                                                                             |

SCHOLARONE™  
Manuscripts

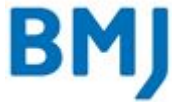

I, the Submitting Author has the right to grant and does grant on behalf of all authors of the Work (as defined in the below author licence), an exclusive licence and/or a non-exclusive licence for contributions from authors who are: i) UK Crown employees; ii) where BMJ has agreed a CC-BY licence shall apply, and/or iii) in accordance with the terms applicable for US Federal Government officers or employees acting as part of their official duties; on a worldwide, perpetual, irrevocable, royalty-free basis to BMJ Publishing Group Ltd ("BMJ") its licensees and where the relevant Journal is co-owned by BMJ to the co-owners of the Journal, to publish the Work in this journal and any other BMJ products and to exploit all rights, as set out in our [licence](#).

The Submitting Author accepts and understands that any supply made under these terms is made by BMJ to the Submitting Author unless you are acting as an employee on behalf of your employer or a postgraduate student of an affiliated institution which is paying any applicable article publishing charge ("APC") for Open Access articles. Where the Submitting Author wishes to make the Work available on an Open Access basis (and intends to pay the relevant APC), the terms of reuse of such Open Access shall be governed by a Creative Commons licence – details of these licences and which [Creative Commons](#) licence will apply to this Work are set out in our licence referred to above.

Other than as permitted in any relevant BMJ Author's Self Archiving Policies, I confirm this Work has not been accepted for publication elsewhere, is not being considered for publication elsewhere and does not duplicate material already published. I confirm all authors consent to publication of this Work and authorise the granting of this licence.

1  
2  
3  
4  
5 **1 Title Page**  
6

7 **2 Title:** Association of periodontal disease with COPD risk and clinical events: a  
8  
9  
10 3 systematic review and meta-analysis  
11  
12

13 4  
14  
15 **5 Authors' full names:** Mei Yang<sup>1\*</sup>, Ran Peng<sup>1,2\*</sup>, Xiaoou Li<sup>1\*</sup>, Junjie Peng<sup>1</sup>, Lin Liu<sup>2#</sup>,  
16  
17  
18 Lei Chen<sup>1#</sup>  
19

20 **7 Authors' affiliations:** <sup>1</sup>Department of Respiratory and Critical Care Medicine, West  
21  
22  
23 8 China Hospital, West China School of Medicine, Sichuan University, Chengdu, Sichuan  
24  
25  
26 9 610041, China.

27  
28 10 <sup>2</sup>Department of Respiratory and Critical Care Medicine, 363 Hospital, Chengdu, Sichuan  
29  
30  
31 11 610041, China  
32

33  
34 12  
35  
36 13 \* Contributed equally.  
37  
38

39 14  
40  
41 15 **#Correspondence to:** Lei Chen (lchens@126.com), Department of Respiratory and  
42  
43  
44 16 Critical Care Medicine, West China Hospital, West China School of Medicine, Sichuan  
45  
46  
47 17 University, Chengdu, Sichuan 610041, China; Lin Liu (lliniu@126.com), Department  
48  
49 18 of Respiratory and Critical Care Medicine, 363 Hospital, Chengdu, Sichuan 610041,  
50  
51  
52 19 China  
53

54 20  
55  
56  
57 21 **Word count of the abstract:** 223  
58  
59  
60

1  
2  
3  
4  
5 22 **Word count of the main text:** 3310  
6  
7

8 23  
9

10 24 **Association of periodontal disease with COPD risk and**  
11  
12  
13 25 **clinical events: a systematic review and meta-analysis**  
14  
15

16 26

17  
18 27 **ABSTRACT**  
19

20 28 **Objectives** Studies have suggested contradictory results of the relationship between  
21  
22  
23 29 chronic obstructive pulmonary disease (COPD) and periodontal disease (PD). The aim  
24  
25  
26 30 of this study was to determine the association of PD with COPD risk and its clinical  
27  
28  
29 31 events.

30  
31 32 **Methods** We systematically searched PubMed, EMBASE and CENTRAL from  
32  
33  
34 33 inception to 10 August 2022, to identify relevant articles. Odds ratio (OR) with 95%  
35  
36 34 confident interval (CI) was pooled in a random-effect model with inverse variance  
37  
38  
39 35 method. We also performed stratified and subgroup analyses.

40  
41 36 **Results** In total, 22 observational studies with 51704 participants were included in the  
42  
43  
44 37 meta-analysis. Pooled analysis of 18 studies suggested that PD was weakly associated  
45  
46 38 with risk of COPD (OR 1.20; 95% CI 1.09 to 1.32;  $I^2=79%$ ) after adjusting for smoking  
47  
48  
49 39 status. In stratified and subgroup analyses, with more strict adjustment for smoking, PD  
50  
51  
52 40 no longer related to COPD risk, when adjusting for smoking intensity (OR 1.14; 95% CI  
53  
54 41 0.86 to 1.51), smokers only (OR 1.46; 95% CI 0.92 to 2.31) and for never smokers (OR  
55  
56  
57 42 0.93; 95% CI 0.72 to 1.21). Pooled analysis of 4 studies indicated that PD did not  
58  
59  
60

1  
2  
3  
4  
5 43 increase risk of COPD-related exacerbation or mortality (OR 1.18; 95% CI 0.71 to 1.97;  
6  
7  
8 44  $I^2=36\%$ ).

9  
10 45 **Conclusions** PD confers no risk for COPD and COPD-related events, with adjustment  
11  
12  
13 46 for confounding by smoking. Further investigations focusing on never smokers are  
14  
15  
16 47 warranted.

## 17 18 19 20 21 49 **STRENGTHS AND LIMITATIONS OF THIS STUDY**

- 22  
23 50 1. This is the largest systematic review and meta-analysis on association between  
24  
25  
26 51 chronic obstructive pulmonary disease (COPD) and periodontal disease (PD)  
27  
28  
29 52 collecting data over 20 years.
- 30  
31 53 2. This study firstly synthesized research evidence regarding correlation of PD with  
32  
33  
34 54 COPD-related exacerbation or mortality.
- 35  
36 55 3. Compared with previous reports, the present study was conducted with more strict  
37  
38  
39 56 adjustment for confounding by smoking, which was the most important confounder  
40  
41  
42 57 in the COPD-PD relationship.
- 43  
44 58 4. Our study provided limited evidence on the outcome of COPD-related events  
45  
46  
47 59 because of limited data.
- 48  
49 60 5. Clinical heterogeneity and publication bias compromised the evidence strength of  
50  
51  
52 61 the study, although subgroup and stratified analyses were performed.

## 53 54 55 56 57 63 **INTRODUCTION**

1  
2  
3  
4  
5 64 Chronic obstructive pulmonary disease (COPD) is the third leading cause of death,  
6  
7  
8 65 resulting in enormous economic burden.<sup>1</sup> Commonly, COPD coexists with other  
9  
10 66 disorders, also called comorbidities, which play key roles in COPD progression and  
11  
12  
13 67 prognosis.<sup>2 3</sup> Understanding COPD-comorbidities relationship has been a momentous  
14  
15 68 prerequisite for optimizing disease prevention and management strategies.<sup>2 3</sup>  
16  
17

18 69 Given ageing and widespread use of inhaled corticosteroids in COPD, periodontal  
19  
20 70 disease (PD) has been a common comorbidity of COPD.<sup>4</sup> It is a chronic inflammatory  
21  
22  
23 71 condition of tissues surrounding and supporting the teeth, including gingiva, bone and  
24  
25  
26 72 ligament,<sup>5</sup> with the prevalence estimates over 10% around the world and especially  
27  
28 73 prevalent in elderly individuals.<sup>6</sup> To date, diagnosis and assessment of PD are mostly  
29  
30  
31 74 based on periodontal measurements including clinical attachment level (CAL), probing  
32  
33  
34 75 pocket depth (PPD) and alveolar bone loss (ABL).<sup>5</sup> They are primary clinical  
35  
36 76 manifestations of PD, reflecting the extent of periodontal tissue destruction.<sup>5</sup>  
37  
38

39 77 Based on the nature of inflammation,<sup>5 7</sup> mounting evidence has shed light on the  
40  
41 78 association between PD and development of COPD.<sup>8 9</sup> Currently three points are  
42  
43  
44 79 proposed. First, they share the same risk factors, such as age, gender, smoking and  
45  
46  
47 80 socioeconomic status.<sup>2 10</sup> Second, they have similar pathogenetic mechanisms. Both  
48  
49 81 diseases are characterized by host susceptibility to environmental factors, immune  
50  
51  
52 82 overreaction, oxidative stress and production of pro-inflammatory cytokines.<sup>7 8</sup> Most  
53  
54 83 importantly, neutrophilic inflammation plays a key role in both diseases.<sup>8 11</sup> Third, oral  
55  
56  
57 84 bacteria released from the dental plaque in PD could trigger progression and acute  
58  
59  
60

1  
2  
3  
4  
5 85 exacerbation (AE) of COPD.<sup>12 13</sup>  
6  
7

8 86 Meanwhile, epidemiological evidence has indicated that PD increased risk of COPD<sup>11</sup>  
9  
10 87 <sup>14 15</sup> and COPD-related events.<sup>13 16</sup> Scannapieco *et al* revealed a 4.5-fold increased risk  
11  
12 88 of developing COPD in patients with PD, compared to those without.<sup>14</sup> A dose-response  
13  
14 89 relationship was further implied between PD severity and lung function.<sup>15</sup> Among  
15  
16 90 patients with both diseases, COPD-related AE and mortality also significantly linked  
17  
18 91 with periodontal status.<sup>13 16</sup> Periodontal therapy, such as scaling and root planing  
19  
20 92 treatment, could ameliorate lung function and decrease frequency of AE in COPD with  
21  
22 93 chronic periodontitis.<sup>17 18</sup> However, there were some other studies revealing opposite  
23  
24 94 results, resulting in a long-standing controversy.<sup>19-21</sup> It is worth noting that, parameters  
25  
26 95 used to determine PD were apparently variable across studies, which also failed to  
27  
28 96 adequately control confounders, especially smoking, the most important confounder in  
29  
30 97 the COPD-PD relationship. Therefore, to provide the latest and most convincing  
31  
32 98 evidence, we systematically reviewed current available literature to investigate  
33  
34 99 association of PD with risk of COPD and COPD-related events. Subgroup and stratified  
35  
36 100 analyses were also conducted to further decrease confounding effect of smoking.  
37  
38  
39  
40  
41  
42  
43  
44  
45  
46  
47  
48

## 102 **Methods**

103 This systematic review and meta-analysis was conducted and reported in accordance to  
104 the Preferred Reporting Items for Systematic Reviews and Meta-Analyses (PRISMA)  
105 guideline.<sup>22</sup>  
58  
59  
60



1  
2  
3  
4  
5 106  
67 107 **Search strategy and selection criteria**  
8  
9

10 108 We searched PubMed, EMBASE and CENTRAL for records evaluating association  
11  
12 109 between COPD and PD, from inception to 10 August 2022. The search strategy was  
13  
14 110 described in online supplemental table S1. The language was restricted to English, for  
15  
16 111 the purpose of rapid review.<sup>23</sup> Studies meeting the following criteria were included: (1)  
17  
18 112 adult participants; (2) original studies with randomized controlled trial (RCT), cohort,  
19  
20 113 case-control or cross-sectional study designs; (3) presenting clear diagnostic or  
21  
22 114 assessment criteria for COPD and PD; (4) evaluating association between PD and risk  
23  
24 115 of COPD, or risk of COPD-related AE and mortality, with statistical adjustment for  
25  
26 116 smoking.  
27  
28  
29  
30  
31  
32

33 117 According to the inclusion criteria, two independent investigators (MY and XL)  
34  
35 118 performed systematical search, screened titles and abstracts of all retrieved studies to  
36  
37 119 exclude duplicate or irrelevant records. For articles requiring further assessment, full-  
38  
39 120 text reviews were carried out and references of retrieved articles and relevant reviews  
40  
41 121 were also manually checked to identify additional eligible studies. Disagreements were  
42  
43 122 resolved by discussion between the two reviewers or with the help of the third  
44  
45 123 investigator (RP).  
46  
47  
48  
49  
50

51 124  
5253  
54 125 **Data extraction and quality assessment**  
55

56  
57 126 Two investigators (MY and RP) independently extracted data from selected studies  
58  
59  
60

1  
2  
3  
4  
5 127 using a standardized Excel (Microsoft Corporation) file. The following information was  
6  
7  
8 128 extracted: author, year of publication, country, study design, number of subjects (COPD  
9  
10 129 and non-COPD), demographic characteristics of participants, periodontal variables  
11  
12  
13 130 applied to assess PD, diagnostic criteria for COPD, definition of COPD-related AE and  
14  
15 131 mortality, adjusted odds ratio (OR), relative risk (RR) or hazard ratio (HR) for risk of  
16  
17  
18 132 COPD, AE and mortality in relation to PD, as well as adjustment for confounders. The  
19  
20 133 primary outcome was risk of COPD. Secondary outcome was risk of COPD-related  
21  
22  
23 134 adverse events, including AE and mortality. Quality of studies was independently  
24  
25  
26 135 evaluated using the Newcastle-Ottawa Scale<sup>24</sup> by two investigators (MY and XL). A  
27  
28 136 score of  $\geq 6$  was considered a low risk while  $< 6$  a high risk of bias. Both case-control  
29  
30  
31 137 and cohort studies had a maximum score of 9. Cross-sectional study was regarded as  
32  
33  
34 138 case-control study when performing quality assessment. Discrepancies regarding data  
35  
36 139 extraction and quality assessment were resolved through discussion and consensus.  
37  
38  
39 140

#### 141 **Data analysis**

142 The final pooled estimate was expressed as OR with 95% confident interval (CI).  
143 Considering CAL, ABL and PPD have been regarded as the primary variables for  
144 assessing PD,<sup>25 26</sup> where more than one adjusted estimate was shown in the paper, we  
145 preferentially used the estimate regarding CAL, ABL or PPD, or the estimate being  
146 better adjusted for tobacco smoking (never smokers  $>$  adjusting for smoking intensity  
147 (duration and dose)  $>$  adjusting for smoking status), where available. For case-control

1  
2  
3  
4  
5 148 and cross-sectional studies, we estimated the OR whereas for cohort studies we  
6  
7  
8 149 estimated the RR or HR. The random-effect model with inverse variance method were  
9  
10 150 applied due to potential heterogeneity resulting from methodological differences.  
11  
12  
13 151 Heterogeneity across studies was identified with the  $I^2$  statistic.  $I^2$  statistic  $> 50\%$   
14  
15 152 indicated significant heterogeneity.

16  
17  
18 153 To explore heterogeneity, subgroup analyses were conducted based on study design  
19  
20 154 (case-control, cross-sectional and cohort studies), geographical location (Asia, North  
21  
22  
23 155 America, Europe), assessment of PD (CAL, ABL and PPD), definition of COPD (Global  
24  
25  
26 156 Initiative for Chronic Obstructive Lung Diseases, GOLD and non-GOLD criteria) and  
27  
28 157 adjustment for smoking intensity, defined as dose and duration of smoking. To better  
29  
30  
31 158 control the confounding effect of smoking, stratified analyses were also performed in  
32  
33  
34 159 smokers and never smokers respectively.

35  
36 160 To test the robustness of study findings, we performed sensitivity analysis on studies  
37  
38  
39 161 with relatively large sample size ( $\geq 500$  participants), which tended to be more  
40  
41  
42 162 representative of the general population and with smaller bias in the overall estimates in  
43  
44 163 meta-analyses.<sup>27</sup> Additionally, influence of a single study on the overall pooled estimate  
45  
46  
47 164 was tested by omitting one study in each turn. Publication bias was visually assessed  
48  
49 165 using a funnel plot and quantitatively evaluated by the Egger's tests.  $p < 0.05$  was  
50  
51  
52 166 considered statistically significant. Evaluation of publication bias, subgroup and  
53  
54  
55 167 stratified analyses were performed only for the risk of COPD due to small number of  
56  
57 168 studies for the other outcome. All statistical analyses were performed using Stata version  
58  
59  
60

1  
2  
3  
4  
5 169 16 (StataCorp) and Review manager version 5.4 (Cochrane Collaboration).  
6  
7  
8 170

9  
10 171 **Patient and public involvement**  
11

12 172 No patient involved.  
13  
14  
15 173

16  
17  
18 174 **RESULTS**

19  
20 175 **Study selection and characteristics**  
21

22  
23 176 A total of 30165 records were identified from the initial database search. 13662 records  
24  
25 177 were removed for duplicates, and 16227 records were excluded after titles and abstracts  
26  
27 178 screening because of irrelevant content and animal studies. The remaining 276 full-text  
28  
29 179 articles were identified for eligibility, of which 252 were excluded for reasons including  
30  
31 180 duplicates (6 studies), reviews (183 studies), insufficient information (9 studies) and  
32  
33 181 ineligible designs and outcomes (54 studies). Finally, 24 studies<sup>14-16 19-21 28-45</sup> were  
34  
35 182 included in the review. The selection process is shown in **figure 1**.  
36  
37  
38  
39  
40

41 183 The characteristics of included 24 studies were shown in online supplemental table  
42  
43 184 S2. The number of participants was 53049 and COPD was more than 21.7%. The mean  
44  
45 185 age of patients with COPD was between 41.4 and 83.1 years while the control subjects  
46  
47 186 was between 42.2 and 80.3 years. These studies were published between 1998 and 2021.  
48  
49 187 The sample size ranged from 117 to 13792. Among included studies, 11 were case-  
50  
51 188 control studies<sup>15 19 28 29 32-34 37 39 42 44</sup> and 10 were cross-sectional studies,<sup>14 20 30 31 35 36 40 41</sup>  
52  
53 189 <sup>43 45</sup> only 3 with a cohort study design.<sup>16 21 38</sup> Additionally, 13 studies were conducted in  
54  
55  
56  
57  
58  
59  
60

1  
2  
3  
4  
5 190 Asia,<sup>15 16 19 28 33 35 36 38-40 42-44</sup> while 6 in the North America,<sup>14 20 21 28-30</sup> 4 in Europe<sup>31 34 37</sup>  
6  
7 191 <sup>41</sup> and one in Africa.<sup>45</sup>  
8  
9

10 192 All included articles performed multivariable analyses, in which risk of COPD, or risk  
11  
12 193 of COPD-related events (AE or mortality), was identified as the dependent variable and  
13  
14 194 PD as the independent variable. Control for smoking included stratification (smokers  
15  
16 195 and never smokers) or covariance adjustment in multivariable models (the degree of  
17  
18 196 control: never smokers > adjusting for smoking intensity (duration and dose) >  
19  
20 197 adjusting for smoking status).  
21  
22  
23  
24  
25

26 198 The adjustment for confounders of included studies was detailedly presented in online  
27  
28 199 supplemental table S3. 16 articles reported the adjusted ORs and 4 reported adjusted RRs,  
29  
30 200 2 reporting HRs. One study provided the F value of the one-way analysis of variance for  
31  
32 201 regression analysis<sup>32</sup> while the other one only provided relevant exponential of  
33  
34 202 coefficient for constant, called as Exp (B).<sup>39</sup> Definition of COPD comprised the GOLD  
35  
36 203 criteria, FEV1 <65% of predicted volume, having a history of chronic bronchitis and /  
37  
38 204 or emphysema, self-reported and others. Periodontal parameters used for PD assessment  
39  
40 205 were CAL, ABL, PPD, gingival bleeding (GB), bleeding index (BI), plaque index (PLI)  
41  
42 206 and oral health index (OHI).  
43  
44  
45  
46  
47  
48  
49  
50

## 51 208 **Assessment of bias**

52  
53  
54 209 Based on the Newcastle-Ottawa Scale, quality assessment for the 24 studies is shown in  
55  
56 210 online supplemental table S4. Among them, 20 studies<sup>15 19-21 28-30 32-44</sup> were rated as high  
57  
58  
59  
60

1  
2  
3  
4  
5 211 quality with a total score of  $\geq 6$  whereas 4 studies<sup>14 16 31 45</sup> as a score of  $< 6$ , indicating  
6  
7  
8 212 a high risk of bias. The main reasons for lower scores were selection bias  
9  
10 213 (representativeness of sample population), especially for control groups and  
11  
12  
13 214 comparability of cases and control subjects.  
14

15 215

### 18 216 **Primary outcome**

19  
20 217 In 20 studies investigating correlation between PD and risk of COPD, only 6<sup>15 19 20 29 33</sup>  
21  
22 218 <sup>36</sup> conducted stratified analyses regarding smoking status, which unanimously suggested  
23  
24 219 PD was not associated with risk of COPD in never smokers. In the remaining 14 studies  
25  
26 220 with relatively inadequate adjustment for smoking, 13 studies<sup>14 28 30-32 34 35 37 38 40-43</sup>  
27  
28 221 revealed PD was significantly correlated with COPD risk in smokers and never smokers  
29  
30 222 combined, the OR value ranging from 1.02 to 10.00. Furthermore, 18 studies<sup>14 15 19 20 28-</sup>  
31  
32 223 <sup>31 33-38 40-43</sup> providing adjusted OR or RR were included in the quantitative analysis,  
33  
34 224 which demonstrated that after adjusting for smoking status, PD increased risk of COPD,  
35  
36 225 but only by a ratio of 1.20 (95% CI 1.09 to 1.32;  $p=0.0002$ ;  $I^2=79\%$ ) (**figure 2**). Further  
37  
38 226 exclusion of any single study did not materially alter the overall pooled OR, with a range  
39  
40 227 from 1.17 (95% CI 1.06-1.28) to 1.28 (95% CI 1.12-1.46). Sensitivity analysis limited  
41  
42 228 to studies with larger sample size ( $\geq 500$ )<sup>15 19 20 28-30 35-38 40 41 43</sup> revealed similar results  
43  
44 229 (OR 1.24; 95% CI 1.08 to 1.43;  $p=0.003$ ;  $I^2=82\%$ ) (online supplemental figure S1).  
45  
46 230 However, significant publication bias was noted by visual inspections of the funnel plot  
47  
48 231 (online supplemental figure S2) and the Egger's test for small study effects (bias  
49  
50  
51  
52  
53  
54  
55  
56  
57  
58  
59  
60

232 coefficient 1.49; 95% CI 0.44 to 2.55; p=0.008).

233 Subgroup analyses indicated that assessment of PD (p=0.02), study design (p=0.05)  
 234 and diagnosis of COPD (p=0.05) were the potential main causes of heterogeneity (**table**  
 235 **1**). Moreover, there were several findings in subgroup analyses. First, comparing to  
 236 studies adjusting for smoking status, pooled analyses on those controlling for smoking  
 237 intensity did not show apparent correlation on PD and COPD risk (OR 1.14; 95% CI  
 238 0.86 to 1.51; p=0.38; 10 studies<sup>15 19 20 29-31 33 34 36 38</sup>), similar to those applying a GOLD  
 239 criterion (OR 1.10; 95% CI 1.00 to 1.22; p=0.06; 12 studies<sup>15 19 20 31 33-36 38 41-43</sup>). Second,  
 240 with regard to assessment of PD (CAL, ABL and PPD), only those using the parameter  
 241 of ABL presented results with statistical significance (OR 1.98; 95% CI 1.32 to 2.97;  
 242 p=0.001; 6 studies<sup>15 28 29 31 33 41</sup>). Third, in the three locations (Asia, North America and  
 243 Europe), obvious impact of PD on COPD risk was only found in studies of Europe (OR  
 244 2.05; 95% CI 1.07 to 3.95; p=0.03; 4 studies<sup>31 34 37 41</sup>).

245

246 **Table 1** Subgroup analyses regarding risk of COPD

| Subgroups                                   | No.<br>Articles | No. Participants<br>/Cases | OR value<br>(95% CI) | P<br>value    | I <sup>2</sup> , % |
|---------------------------------------------|-----------------|----------------------------|----------------------|---------------|--------------------|
| Adjusted for smoking intensity <sup>a</sup> |                 |                            |                      |               |                    |
| Yes                                         | 10              | 27,246 / 3,556             | 1.14 (0.86-1.51)     | 0.38          | 67                 |
| No                                          | 8               | 22,158 / 5,478             | 1.29 (1.13-1.48)     | <b>0.0002</b> | 75                 |
| Assessment of PD                            |                 |                            |                      |               |                    |

|                       |    |                |                   |               |    |
|-----------------------|----|----------------|-------------------|---------------|----|
| CAL                   | 8  | 24,600 / 3,058 | 1.04 (0.96-1.14)  | 0.33          | 75 |
| ABL                   | 6  | 4,629 / 1,530  | 1.98 (1.32-2.97)  | <b>0.001</b>  | 56 |
| PPD                   | 8  | 19,189 / 3,519 | 1.16 (0.89-1.51)  | 0.27          | 63 |
| Geographical location |    |                |                   |               |    |
| Asia                  | 9  | 18,831 / 3,606 | 1.07 (0.99-1.17)  | 0.08          | 65 |
| North America         | 5  | 24,033 / 2,420 | 1.37 (0.93-2.01)  | 0.11          | 63 |
| Europe                | 4  | 6,540 / 3,008  | 2.05 (1.07-3.95)  | <b>0.03</b>   | 71 |
| Assessment of COPD    |    |                |                   |               |    |
| GOLD                  | 12 | 19,879 / 3,774 | 1.10 (1.00-1.22)  | 0.06          | 71 |
| Non-GOLD              | 6  | 29,525 / 5,260 | 1.35 (1.14-1.61)  | <b>0.0007</b> | 46 |
| Study design          |    |                |                   |               |    |
| Case-control          | 8  | 9,911 / 4,472  | 1.12 (1.01-1.24)  | <b>0.03</b>   | 86 |
| Cross-sectional       | 9  | 38,593 / 4,540 | 1.34 (1.08-1.66)  | <b>0.007</b>  | 45 |
| Cohort                | 1  | 878 / 22       | 3.51 (1.15-10.74) | <b>0.03</b>   | -  |

247 <sup>a</sup>Duration and dose of smoking.

248 ABL, alveolar bone loss; CAL, clinical attachment level; CI, confident interval; GOLD, Global  
 249 Initiative for Chronic Obstructive Lung Disease; OR, odds ratio; PD, periodontal disease; PPD,  
 250 probing pocket depth.

251 **Bold:** subgroups with positive results.

252

253 Stratified analyses regarding smoking status revealed that PD did not increase the risk  
 254 of COPD whether in smokers (OR 1.46; 95% CI 0.92 to 2.31; p=0.11; 7 studies<sup>15 19 20 29</sup>  
 255 <sup>31 33 36</sup>) or never smokers (OR 0.93; 95% CI 0.72 to 1.21; p=0.58; 6 studies<sup>15 19 20 29 33 36</sup>)  
 256 (**figure 3**).



257

**258 Secondary outcome**

259 Only four studies evaluated risk of COPD-related AE or mortality, with adjusting for  
260 smoking.<sup>16 21 44 45</sup> Definition of AE was acute deterioration in clinical presentations  
261 according to the recommendation in GOLD guideline.<sup>21 44 45</sup> These studies applied more  
262 than one parameter to assess PD, in which the parameters of CAL, ABL and PPD  
263 unanimously showed no association with risk of AE or mortality. Pooled analysis  
264 showed that after adjusting for smoking status, PD was also not linked with COPD-  
265 related AE or mortality (OR 1.18; 95% CI 0.71 to 1.97; p=0.52; I<sup>2</sup>=36%) (**figure 4**).

266

**267 DISCUSSION**

268 This systematic review and meta-analysis identified 24 observational studies to  
269 investigate association of PD on risk of COPD and COPD-related events. The results  
270 indicated after adjusting for smoking status, a 1.20-fold increase in the odds of COPD  
271 was observed in patients with PD, but with more strict control for smoking intensity, PD  
272 no longer correlated with COPD risk, which was verified in the subgroup and stratified  
273 analyses. Meanwhile, PD was also not increase risk of COPD-related events (AE or  
274 mortality) when controlling for smoking.

275 To the best of our knowledge, this is the first and largest meta-analysis investigating  
276 association of PD with COPD risk and its clinical events, with adequately controlling  
277 the confounding effect of smoking. Also, in quantitative analysis, nearly all included

1  
2  
3  
4  
5 278 articles were adjusted for age, except the study by Scannapieco *et al.*<sup>14</sup> In prior evidence,  
6  
7  
8 279 PD was suggested significantly increasing risk of COPD and COPD-related events.  
9  
10 280 However, the majority of studies has obvious flaws, such as only applying univariate  
11  
12  
13 281 analyses, not controlling confounding effect of smoking, and using parameters with  
14  
15 282 relatively low specificity to determine PD.<sup>13 25 45</sup> To define periodontal disease as  
16  
17  
18 283 accurately as possible, we preferentially extracted results concerning the parameter of  
19  
20  
21 284 CAL, ABL or PPD rather than PLI, OHI or remaining teeth. CAL, ABL and PPD are  
22  
23 285 clinical measurements reflecting the destruction of periodontal tissues, also the basis for  
24  
25  
26 286 PD diagnosis.<sup>25</sup> Meanwhile, compared with previous meta-analyses, we enrolled more  
27  
28  
29 287 studies, applied more rigorous screening criteria and most importantly, revealed opposite  
30  
31 288 results. In meta-analyses with incomplete adjustment for smoking, OR value for COPD  
32  
33  
34 289 risk in relation to PD ranged from 1.64 to 2.08.<sup>46-48</sup> However, our findings were similar  
35  
36 290 to studies conducted in never smokers,<sup>15 19 20 29 33 36</sup> showing PD conferred no risk for  
37  
38  
39 291 COPD. Additionally, pooled results regarding parameters of CAL, ABL and PPD  
40  
41  
42 292 revealed that PD also did not increase risk of COPD-related AE or mortality. These  
43  
44 293 demonstrate that previously reported correlation between PD and COPD may be results  
45  
46 294 of flawed study design, confounding by smoking and even other factors, such as age and  
47  
48  
49 295 living condition.

50  
51 296 As a momentous inducer in inflammation-related pathological processes, tobacco is  
52  
53  
54 297 known to correlate with a variety of systemic disorders.<sup>49</sup> It is also one of the foremost  
55  
56  
57 298 risk factors for both PD and COPD.<sup>5 10</sup> From the epidemiological perspective, tobacco  
58  
59  
60

1  
2  
3  
4  
5 299 smoking is a confounder with spuriously inflated effect on the relationship between PD  
6  
7  
8 300 and systemic diseases.<sup>49</sup> To investigate the true association between PD and COPD, it is  
9  
10 301 of great importance to rigorously control the confounding effect of smoking, which  
11  
12  
13 302 means initiating research in never smokers. However, the majority of former studies  
14  
15 303 failed to do that. After a wide search, only six studies focusing on never smokers were  
16  
17  
18 304 found, which unanimously indicated PD was not related with COPD risk. We also  
19  
20  
21 305 observed decreased magnitude of the association as the control for smoking elevated in  
22  
23 306 the quantitative analysis. Therefore, it could be too early to make a certain conclusion  
24  
25  
26 307 on the COPD-PD relationship. Although interventional studies revealed that periodontal  
27  
28  
29 308 treatment reduced the risk of AE, a number of problems existed, including small sample  
30  
31 309 size, limited study quality and unclear history of smoking or medication during the  
32  
33  
34 310 follow-up.<sup>17 18</sup> For example, compared with control subjects, patients in treatment groups  
35  
36  
37 311 may reduce smoking intentionally, which could spuriously enhance the positive effect  
38  
39 312 of periodontal treatment. Consequently, future researches need to take these problems  
40  
41 313 into account.

42  
43  
44 314 It is worth noting that, another possibility that smoking acts as an effect modifier in  
45  
46  
47 315 the COPD-PD relationship should not be ignored. Two observational studies performed  
48  
49  
50 316 stratified analyses concerning smoking status and found strong correlation of PD with  
51  
52 317 COPD risk was restricted to smokers.<sup>15 20</sup> However, this was not revealed in the current  
53  
54  
55 318 study, thus more investigations in smokers are required.

56  
57 319 Besides, current evidence has demonstrated several issues to be addressed in future  
58  
59  
60

1  
2  
3  
4  
5 320 relevant study, comprising inconsistent diagnostic criteria of COPD and PD, the lack of  
6  
7  
8 321 prospective study design and differing adjustments for covariates. These contribute to  
9  
10 322 substantial heterogeneity among studies.<sup>46 47</sup> The present study indicated the  
11  
12  
13 323 heterogeneity was partly explained by study design, diagnostic criteria of COPD and  
14  
15 324 periodontal indexes used to assess PD. Significant association concerning PD and risk  
16  
17  
18 325 of COPD was only identified in subgroups lacking well designs, applying non-GOLD  
19  
20  
21 326 criteria or utilizing ABL as the measure of PD. For one thing, this demonstrated that, as  
22  
23  
24 327 sources of bias, observational study design and nonstandard diagnostic method for  
25  
26  
27 328 COPD could bring apparent errors, confusing the true relationship of PD with COPD.  
28  
29  
30 329 For another, given undetermined diagnostic criteria for PD, discrepancies between ABL  
31  
32  
33 330 and other indexes cannot fully support the COPD-PD association. Notably, as a  
34  
35  
36 331 radiographic measure, although ABL has been widely considered to reflect cumulative  
37  
38  
39 332 effects of periodontal attachment loss over time by chronic inflammation,<sup>28</sup> it does not  
40  
41  
42 333 only exist in PD. Non-periodontal diseases such as liver disorders, cancer and  
43  
44  
45 334 osteoporosis<sup>50</sup> could also result in ABL. As mentioned previously,<sup>28</sup> the observed  
46  
47  
48 335 correlation between ABL and COPD risk may relate to those non-periodontal diseases.  
49  
50  
51 336 Therefore, this remains to be explored further.

52 337

### 53 338 **Limitations**

54 339 Several potential limitations should be taken into consideration when interpreting the  
55  
56  
57 340 present results. First, all included studies are observational, which are highly subject to  
58  
59  
60

1  
2  
3  
4  
5 341 selection bias and confounding by indication. Second, substantial heterogeneity was  
6  
7  
8 342 identified in current study, though we conducted subgroup and stratified analyses to  
9  
10 343 partly explain and reduce it. As stated above, several problems leading to heterogeneity  
11  
12  
13 344 need to be addressed in future researches. Third, the number of studies on risk of COPD-  
14  
15 345 related events was limited, thus the result needs to be carefully understood. Limited  
16  
17  
18 346 number of studies in subgroup and stratified analyses suggested more relevant studies  
19  
20  
21 347 with larger sample size are required. Fourth, although confounding effects of age and  
22  
23 348 smoking were controlled by stratified analysis and statistical adjustment, other potential  
24  
25  
26 349 confounders such as gender, living condition and socioeconomic status<sup>10</sup> could also  
27  
28  
29 350 reduce reliability of the results. Fifth, obvious publication bias was noted in relevant  
30  
31 351 meta-analyses,<sup>46 47</sup> including the present study. For the purpose of rapid review,<sup>23</sup> we  
32  
33  
34 352 only included articles in English. There could exist non-English publications and  
35  
36  
37 353 unpublished evidence, despite we searched English-language studies as much as possible.  
38  
39 354 Finally, although smoking status and intensity were considered in subgroup analysis,  
40  
41  
42 355 information regarding tobacco content and chemical composition were not collected.  
43  
44 356 This information is difficult to obtain, especially from self-reported smoking, leaving a  
45  
46  
47 357 residual smoking-related bias. Consequently, it is advisable to explore relationship  
48  
49 358 between COPD and PD in never smokers.

359

## 360 **CONCLUSION**

361 In summary, this systematic review and meta-analysis suggested that PD was not

1  
2  
3  
4  
5 362 associated with risk of COPD and COPD-related events. Previously reported  
6  
7  
8 363 relationship between COPD and PD may be results of flawed study design and  
9  
10 364 confounding by smoking. However, future well-designed studies are required to validate  
11  
12  
13 365 the present findings.  
14

15 366

### 18 367 **Abbreviations**

19  
20 368 ABL: Alveolar bone loss; AE: Acute exacerbation; BI: Bleeding index; CAL: Clinical  
21  
22  
23 369 attachment level; CI: Confident interval; COPD: Chronic obstructive pulmonary disease;  
24  
25  
26 370 GB: Gingival bleeding; GOLD: Global Initiative for Chronic Obstructive Lung Diseases;  
27  
28 371 HR: Hazard ratio; OHI: Oral health index; OR: Odds ratio; PD: Periodontal disease; PLI:  
29  
30 372 Plaque index; PPD: Probing pocket depth; RR: Relative risk.  
31  
32

33 373

34  
35  
36 374 **Contributors** LC and LL designed the study. MY and XL screened and selected relevant  
37  
38 375 studies. MY, RP and XL rated the study quality and extracted the data. MY, RP, XL and  
39  
40  
41 376 JP analyzed the data. All authors interpreted the data, and MY, RP, XL, JP drafted the  
42  
43  
44 377 paper. LC and LL critically revised the paper. All authors acknowledged and agreed with  
45  
46  
47 378 the format and content of the paper before submission for publication. LC and LL are  
48  
49 379 the guarantors and responsible for the overall contents of this study.  
50

51 380

52  
53  
54 381 **Funding** This research received no specific grant from any funding agency in the public,  
55  
56  
57 382 commercial or not-for-profit sectors.  
58  
59  
60

1  
2  
3  
4  
5 383  
6  
7

8 384 **Competing interests** None declared.  
9

10 385  
11  
12

13 386 **Patient and public involvement** Patients and/or the public were not involved in the  
14  
15 387 design, or conduct, or reporting, or dissemination plans of this research.  
16  
17

18 388  
19

20 389 **Patient consent for publication** Not applicable.  
21  
22

23 390  
24

25 391 **Ethics approval** Not applicable.  
26  
27

28 392  
29

30 393 **Data availability statement** The data that support the findings of this study are available  
31  
32 394 from the corresponding author upon reasonable request.  
33  
34

35 395  
36  
37

38 396 **ORCID iD**  
39

40 397 Lei Chen <https://orcid.org/0000-0003-3476-0035>  
41  
42  
43

44 398  
45

## 46 399 **REFERENCES**

- 47  
48 400 1. World Health Organization. The top 10 causes of death, 2020. Available:  
49  
50 <https://www.who.int/news-room/fact-sheets/detail/the-top-10-causes-of-death>  
51 401  
52 (accessed 13 May 2022)  
53 402  
54 403 2. Global Initiative for Chronic Obstructive Lung Disease. Global strategy for the  
55  
56 diagnosis, management and prevention of chronic obstructive pulmonary  
57 404  
58 disease (2022 report). Available: <https://goldcopd.org/2022-gold-reports/>  
59 405  
60

- 1  
2  
3  
4  
5 406 (accessed 13 May 2022)  
6  
7 407 3. Negewo NA, Gibson PG, McDonald VM. COPD and its comorbidities: Impact,  
8  
9 408 measurement and mechanisms. *Respirology* 2015;20:1160-71.  
10  
11 409 4. Tan L, Tang X, Pan C, *et al.* Relationship among clinical periodontal,  
12  
13 410 microbiologic parameters and lung function in participants with chronic  
14  
15 411 obstructive pulmonary disease. *J Periodontol* 2019;90:134-40.  
16  
17 412 5. Pihlstrom BL, Michalowicz BS, Johnson NW. Periodontal diseases. *Lancet*  
18  
19 413 2005;366:1809-20.  
20  
21 414 6. Kassebaum NJ, Bernabé E, Dahiya M, *et al.* Global burden of severe  
22  
23 415 periodontitis in 1990-2010: a systematic review and meta-regression. *J Dent*  
24  
25 416 *Res* 2014;93:1045-53.  
26  
27 417 7. Szczepanik FSC, Grossi ML, Casati M, *et al.* Periodontitis is an inflammatory  
28  
29 418 disease of oxidative stress: We should treat it that way. *Periodontol 2000*  
30  
31 419 2020;84:45-68.  
32  
33 420 8. Usher AK, Stockley RA. The link between chronic periodontitis and COPD: a  
34  
35 421 common role for the neutrophil? *BMC Med* 2013;11:241.  
36  
37 422 9. Dong J, Li W, Wang Q, *et al.* Relationships Between Oral Microecosystem and  
38  
39 423 Respiratory Diseases. *Front Mol Biosci* 2021;8:718222.  
40  
41 424 10. Genco RJ, Borgnakke WS. Risk factors for periodontal disease. *Periodontol*  
42  
43 425 *2000* 2013;62:59-94.  
44  
45 426 11. Sapey E, Yonel Z, Edgar R, *et al.* The clinical and inflammatory relationships  
46  
47 427 between periodontitis and chronic obstructive pulmonary disease. *J Clin*  
48  
49 428 *Periodontol* 2020;47:1040-52.  
50  
51 429 12. Scannapieco FA. Role of oral bacteria in respiratory infection. *J Periodontol*  
52  
53 430 1999;70:793-802.  
54  
55 431 13. Kelly N, Winning L, Irwin C, *et al.* Periodontal status and chronic obstructive  
56  
57 432 pulmonary disease (COPD) exacerbations: a systematic review. *BMC Oral*  
58  
59 433 *Health* 2021;21:425.  
60  
60 434 14. Scannapieco FA, Papandonatos GD, Dunford RG. Associations between oral



- 1  
2  
3  
4  
5 435 conditions and respiratory disease in a national sample survey population. *Ann*  
6  
7 436 *Periodontol* 1998;3:251-6.
- 8  
9 437 15. Si Y, Fan H, Song Y, *et al.* Association between periodontitis and chronic  
10  
11 438 obstructive pulmonary disease in a Chinese population. *J Periodontol*  
12  
13 439 2012;83:1288-96.
- 14  
15 440 16. Qian Y, Yuan W, Mei N, *et al.* Periodontitis increases the risk of respiratory  
16  
17 441 disease mortality in older patients. *Exp Gerontol* 2020;133:110878.
- 18  
19 442 17. Zhou X, Han J, Liu Z, *et al.* Effects of periodontal treatment on lung function  
20  
21 443 and exacerbation frequency in patients with chronic obstructive pulmonary  
22  
23 444 disease and chronic periodontitis: a 2-year pilot randomized controlled trial. *J*  
24  
25 445 *Clin Periodontol* 2014;41:564-72.
- 26  
27 446 18. Kucukcoskun M, Baser U, Oztekin G, *et al.* Initial periodontal treatment for  
28  
29 447 prevention of chronic obstructive pulmonary disease exacerbations. *J*  
30  
31 448 *Periodontol* 2013;84:863-70.
- 32  
33 449 19. Wang Z, Zhou X, Zhang J, *et al.* Periodontal health, oral health behaviours, and  
34  
35 450 chronic obstructive pulmonary disease. *J Clin Periodontol* 2009;36:750-5.
- 36  
37 451 20. Hyman JJ, Reid BC. Cigarette smoking, periodontal disease: and chronic  
38  
39 452 obstructive pulmonary disease. *J Periodontol* 2004;75:9-15.
- 40  
41 453 21. Barros SP, Suruki R, Loewy ZG, *et al.* A cohort study of the impact of tooth  
42  
43 454 loss and periodontal disease on respiratory events among COPD subjects:  
44  
45 455 modulatory role of systemic biomarkers of inflammation. *PLoS One*  
46  
47 456 2013;8:e68592.
- 48  
49 457 22. Moher D, Shamseer L, Clarke M, *et al.* Preferred reporting items for systematic  
50  
51 458 review and meta-analysis protocols (PRISMA-P) 2015 statement. *Syst Rev*  
52  
53 459 2015;4:1.
- 54  
55 460 23. Nussbaumer-Streit B, Klerings I, Dobrescu AI, *et al.* Excluding non-English  
56  
57 461 publications from evidence-syntheses did not change conclusions: a meta-  
58  
59 462 epidemiological study. *J Clin Epidemiol* 2020;118:42-54.
- 60  
463 24. Wells G, Shea B, O'Connell D, *et al.* The Newcastle-Ottawa Scale (NOS) for

- 1  
2  
3  
4  
5 464 assessing the quality of nonrandomised studies in meta-analyses, 2021.  
6  
7 465 Available: [http://www.ohri.ca/programs/clinical\\_epidemiology/oxford.asp](http://www.ohri.ca/programs/clinical_epidemiology/oxford.asp)  
8  
9 466 (accessed 21 March 2022).
- 10 467 25. Kinane DF, Stathopoulou PG, Papapanou PN. Periodontal diseases. *Nat Rev*  
11  
12 468 *Dis Primers* 2017;3:17038.
- 13  
14 469 26. Farook FF, Alodwene H, Alharbi R, *et al.* Reliability assessment between  
15  
16 470 clinical attachment loss and alveolar bone level in dental radiographs. *Clin Exp*  
17  
18 471 *Dent Res* 2020;6:596-601.
- 19  
20 472 27. Lin L. Bias caused by sampling error in meta-analysis with small sample sizes.  
21  
22 473 *PLoS One* 2018;13:e0204056.
- 23  
24 474 28. Hayes C, Sparrow D, Cohen M, *et al.* The association between alveolar bone  
25  
26 475 loss and pulmonary function: the VA Dental Longitudinal Study. *Ann*  
27  
28 476 *Periodontol* 1998;3:257-61.
- 29  
30 477 29. Garcia RI, Nunn ME, Vokonas PS. Epidemiologic associations between  
31  
32 478 periodontal disease and chronic obstructive pulmonary disease. *Ann*  
33  
34 479 *Periodontol* 2001;6:71-7.
- 35  
36 480 30. Scannapieco FA, Ho AW. Potential associations between chronic respiratory  
37  
38 481 disease and periodontal disease: analysis of National Health and Nutrition  
39  
40 482 Examination Survey III. *J Periodontol* 2001;72:50-6.
- 41  
42 483 31. Leuckfeld I, Obregon-Whittle MV, Lund MB, *et al.* Severe chronic obstructive  
43  
44 484 pulmonary disease: association with marginal bone loss in periodontitis. *Respir*  
45  
46 485 *Med* 2008;102:488-94.
- 47  
48 486 32. Deo V, Bhongade ML, Ansari S, *et al.* Periodontitis as a potential risk factor  
49  
50 487 for chronic obstructive pulmonary disease: a retrospective study. *Indian J Dent*  
51  
52 488 *Res* 2009;20:466-70.
- 53  
54 489 33. Zhou X, Han J, Song Y, *et al.* Serum levels of 25-hydroxyvitamin D, oral  
55  
56 490 health and chronic obstructive pulmonary disease. *J Clin Periodontol*  
57  
58 491 2012;39:350-6.
- 59  
60 492 34. Ledić K, Marinković S, Puhar I, *et al.* Periodontal disease increases risk for

- 1  
2  
3  
4  
5 493 chronic obstructive pulmonary disease. *Coll Antropol* 2013;37:937-42.
- 6  
7 494 35. Chung JH, Hwang HJ, Kim SH, *et al.* Associations Between Periodontitis and  
8  
9 495 Chronic Obstructive Pulmonary Disease: The 2010 to 2012 Korean National  
10  
11 496 Health and Nutrition Examination Survey. *J Periodontol* 2016;87:864-71.
- 12  
13 497 36. Harland J, Furuta M, Takeuchi K, *et al.* Periodontitis modifies the association  
14  
15 498 between smoking and chronic obstructive pulmonary disease in Japanese men.  
16  
17 499 *J Oral Sci* 2018;60:226-31.
- 18  
19 500 37. Lopez-de-Andrés A, Vazquez-Vazquez L, Martinez-Huedo MA, *et al.* Is COPD  
20  
21 501 associated with periodontal disease? A population-based study in Spain. *Int J*  
22  
23 502 *Chron Obstruct Pulmon Dis* 2018;13:3435-45.
- 24  
25 503 38. Takeuchi K, Matsumoto K, Furuta M, *et al.* Periodontitis Is Associated with  
26  
27 504 Chronic Obstructive Pulmonary Disease. *J Dent Res* 2019;98:534-40.
- 28  
29 505 39. Bomble N, Shetiya SH, Agarwal DR. Association of periodontal status with  
30  
31 506 lung function in patients with and without chronic obstructive pulmonary  
32  
33 507 disease visiting a medical hospital in Pune: A comparative study. *J Indian Soc*  
34  
35 508 *Periodontol* 2020;24:67-71.
- 36  
37 509 40. Jung ES, Lee KH, Choi YY. Association between oral health status and chronic  
38  
39 510 obstructive pulmonary disease in Korean adults. *Int Dent J* 2020;70:208-13.
- 40  
41 511 41. Winning L, Polyzois I, Sanmartin Berglund J, *et al.* Periodontitis and airflow  
42  
43 512 limitation in older Swedish individuals. *J Clin Periodontol* 2020;47:715-25.
- 44  
45 513 42. Zhou X, Wang J, Liu W, *et al.* Periodontal Status and Microbiologic Pathogens  
46  
47 514 in Patients with Chronic Obstructive Pulmonary Disease and Periodontitis: A  
48  
49 515 Case-Control Study. *Int J Chron Obstruct Pulmon Dis* 2020;15:2071-9.
- 50  
51 516 43. Kataoka S, Kimura M, Yamaguchi T, *et al.* A cross-sectional study of  
52  
53 517 relationships between periodontal disease and general health: The Hitachi Oral  
54  
55 518 Healthcare Survey. *BMC Oral Health* 2021;21:644.
- 56  
57 519 44. Liu Z, Zhang W, Zhang J, *et al.* Oral hygiene, periodontal health and chronic  
58  
59 520 obstructive pulmonary disease exacerbations. *J Clin Periodontol* 2012;39:45-  
60 521 52.

- 1  
2  
3  
4  
5 522 45. AbdelHalim H, AboElNaga H, Aggour R. Chronic obstructive pulmonary  
6 523 disease exacerbations and periodontitis: a possible association. *The Egyptian*  
7 524 *Journal of Bronchology* 2018.
- 10 525 46. Zeng XT, Tu ML, Liu DY, *et al.* Periodontal disease and risk of chronic  
11 526 obstructive pulmonary disease: a meta-analysis of observational studies. *PLoS*  
12 527 *One* 2012;7:e46508.
- 16 528 47. Gomes-Filho IS, Cruz SSD, Trindade SC, *et al.* Periodontitis and respiratory  
17 529 diseases: A systematic review with meta-analysis. *Oral Dis* 2020;26:439-46.
- 20 530 48. Wu Z, Xiao C, Chen F, *et al.* Pulmonary disease and periodontal health: a  
21 531 meta-analysis. *Sleep Breath* 2022.
- 24 532 49. Hujoel PP, Drangsholt M, Spiekerman C, *et al.* Periodontitis-systemic disease  
25 533 associations in the presence of smoking--causal or coincidental? *Periodontol*  
26 534 *2000* 2002;30:51-60.
- 30 535 50. Intini G, Katsuragi Y, Kirkwood KL, *et al.* Alveolar bone loss: mechanisms,  
31 536 potential therapeutic targets, and interventions. *Adv Dent Res* 2014;26:38-46.

537

538

539

540

541

542

543

## 544 **Figure legends**

545 **Figure 1** PRISMA flow diagram of study selection.

546 **Figure 2** Forest plot of the risk of COPD by periodontal disease, subgroup analysis based

1  
2  
3  
4  
5 547 on adjusted by smoking status and intensity versus by smoking status only. Values more  
6  
7  
8 548 than one indicate a higher risk in patients with periodontal disease.

9  
10 549 **Figure 3** Forest plot of the risk of COPD by periodontal disease. **A** in smokers and **B** in  
11  
12  
13 550 never smokers. Values more than one indicate a higher risk in patients with periodontal  
14  
15 551 disease.

16  
17  
18 552 **Figure 4** Forest plot of the risk of COPD-related events by periodontal disease. Values  
19  
20  
21 553 more than one indicate a higher risk in patients with periodontal disease.

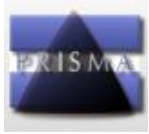

## PRISMA 2009 Flow Diagram

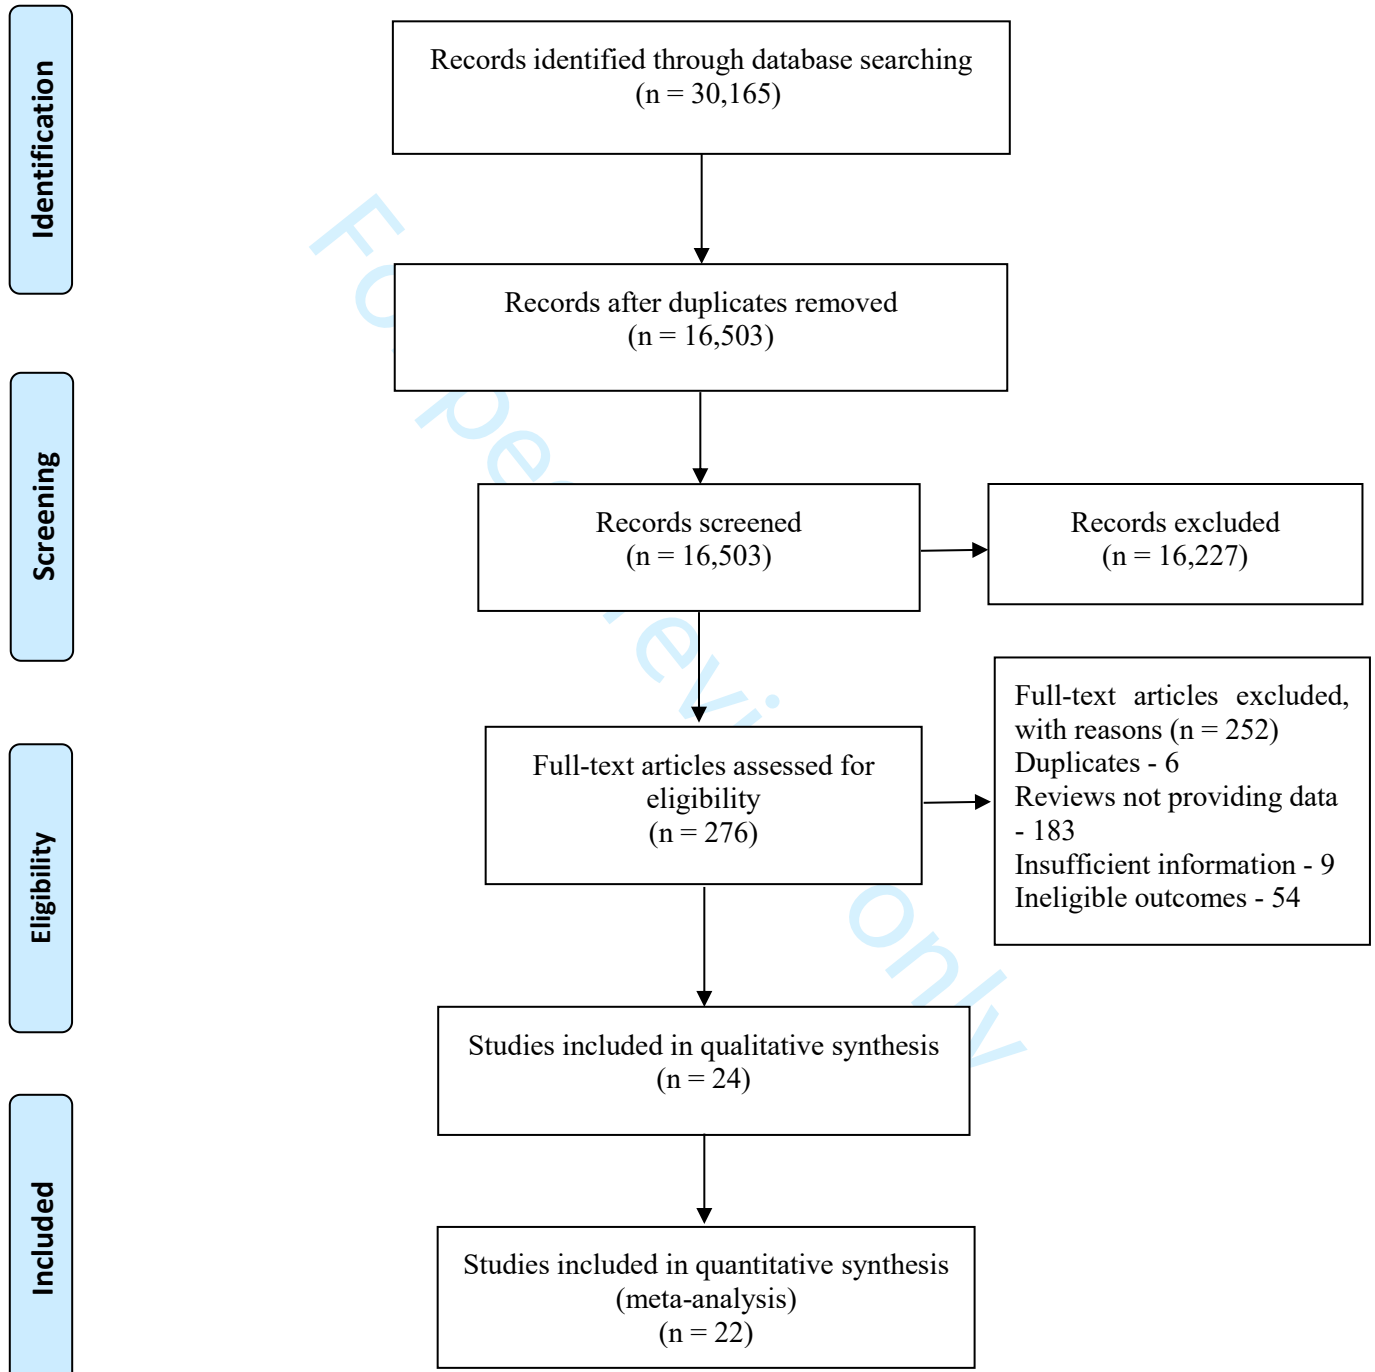

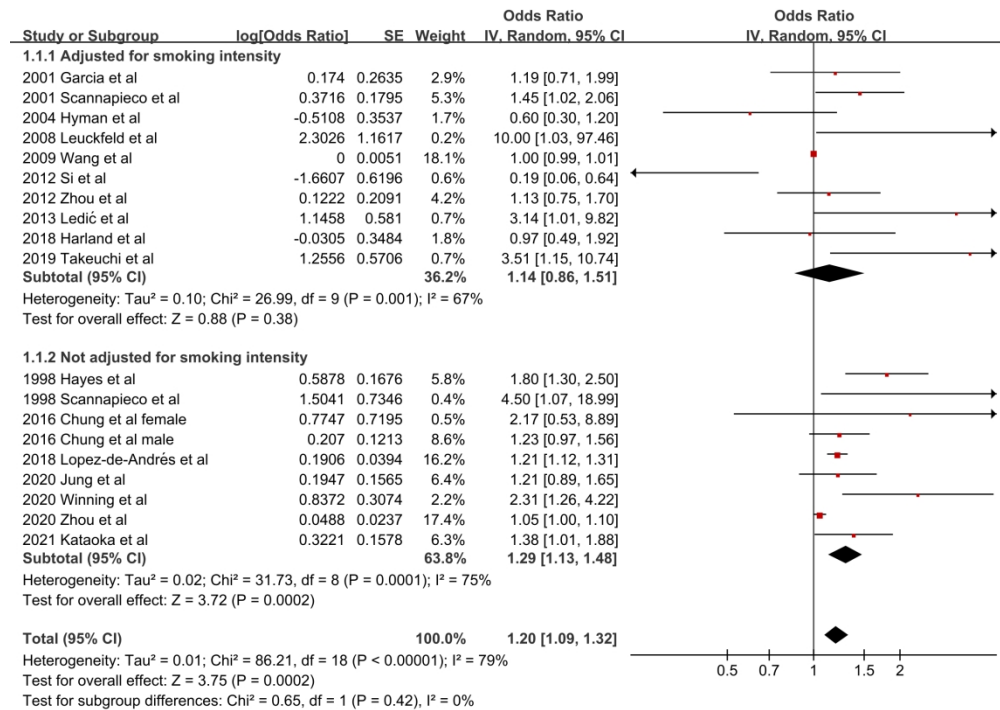

Figure 2 Forest plot of the risk of COPD by periodontal disease, subgroup analysis based on adjusted by smoking status and intensity versus by smoking status only. Values more than one indicate a higher risk in patients with periodontal disease.

536x384mm (118 x 118 DPI)

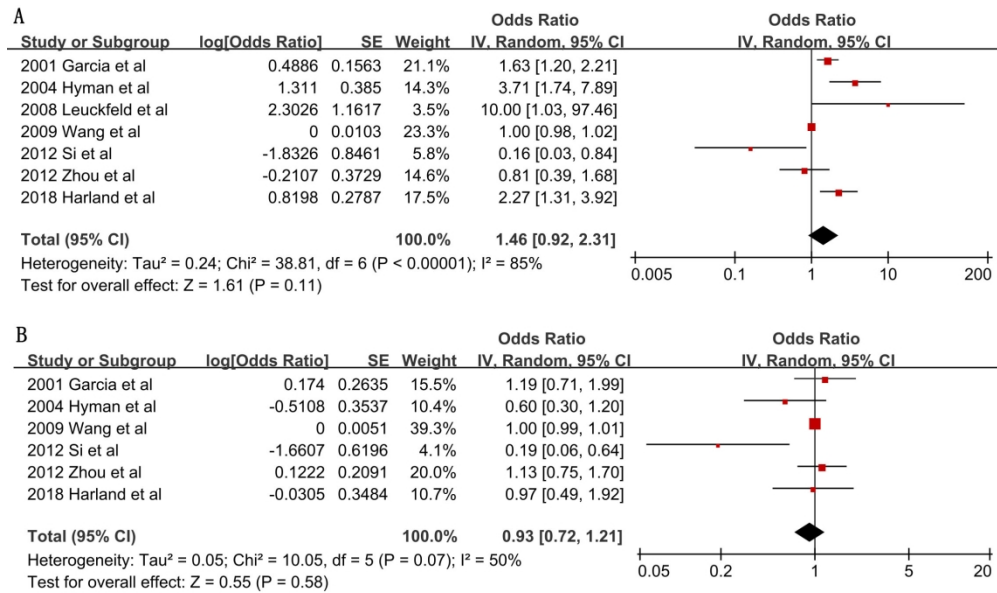

Figure 3 Forest plot of the risk of COPD by periodontal disease. A in smokers and B in never smokers. Values more than one indicate a higher risk in patients with periodontal disease.

192x118mm (300 x 300 DPI)



1  
2  
3  
4  
5  
6  
7  
8  
9  
10  
11  
12  
13  
14  
15  
16  
17  
18  
19  
20  
21  
22  
23  
24  
25  
26  
27  
28  
29  
30  
31  
32  
33  
34  
35  
36  
37  
38  
39  
40  
41  
42  
43  
44  
45  
46  
47  
48  
49  
50  
51  
52  
53  
54  
55  
56  
57  
58  
59  
60

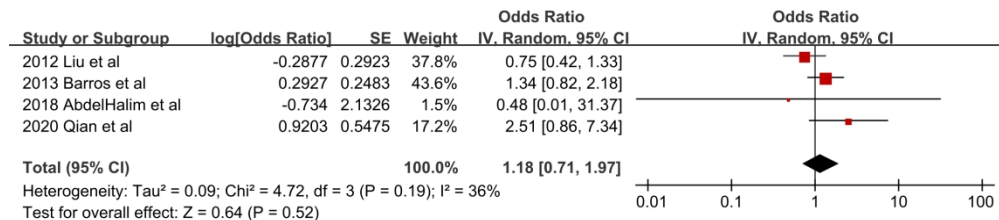

Figure 4 Forest plot of the risk of COPD-related events by periodontal disease. Values more than one indicate a higher risk in patients with periodontal disease.

497x118mm (118 x 118 DPI)

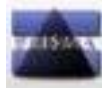

## PRISMA 2009 Checklist

| Section/topic             | Item No | Checklist item                                                                                                                                                                                                                                                                                              | Reported on Page Number/Line Number | Reported on Section/Paragraph                  |
|---------------------------|---------|-------------------------------------------------------------------------------------------------------------------------------------------------------------------------------------------------------------------------------------------------------------------------------------------------------------|-------------------------------------|------------------------------------------------|
| <b>TITLE</b>              |         |                                                                                                                                                                                                                                                                                                             |                                     |                                                |
| Title                     | 1       | Identify the report as a systematic review, meta-analysis, or both.                                                                                                                                                                                                                                         | Page 1 / Line 2                     | Title page                                     |
| <b>ABSTRACT</b>           |         |                                                                                                                                                                                                                                                                                                             |                                     |                                                |
| Structured summary        | 2       | Provide a structured summary including, as applicable: background; objectives; data sources; study eligibility criteria, participants, and interventions; study appraisal and synthesis methods; results; limitations; conclusions and implications of key findings; systematic review registration number. | Page 2 / Line 27-46                 | Abstract                                       |
| <b>INTRODUCTION</b>       |         |                                                                                                                                                                                                                                                                                                             |                                     |                                                |
| Rationale                 | 3       | Describe the rationale for the review in the context of what is already known.                                                                                                                                                                                                                              | Page 3-5 / Line 63-96               | Introduction / Paragraph 1-4                   |
| Objectives                | 4       | Provide an explicit statement of questions being addressed with reference to participants, interventions, comparisons, outcomes, and study design (PICOS).                                                                                                                                                  | Page 5 / Line 96-99                 | Introduction / Paragraph 4                     |
| <b>METHODS</b>            |         |                                                                                                                                                                                                                                                                                                             |                                     |                                                |
| Protocol and registration | 5       | Indicate if a review protocol exists, if and where it can be accessed (e.g., Web address), and, if available, provide registration information including registration number.                                                                                                                               | Page 5 / Line 102-104               | Methods / Paragraph 2                          |
| Eligibility criteria      | 6       | Specify study characteristics (e.g., PICOS, length of follow-up) and report characteristics (e.g., years considered, language, publication status) used as criteria for eligibility, giving rationale.                                                                                                      | Page 6 / Line 111-115               | Methods / Paragraph 2                          |
| Information sources       | 7       | Describe all information sources (e.g., databases with dates of coverage, contact with study authors to identify additional studies) in the search and date last searched.                                                                                                                                  | Page 5 / Line 107,108               | Methods / Paragraph 2                          |
| Search                    | 8       | Present full electronic search strategy for at least one database, including any limits used, such that it could be repeated.                                                                                                                                                                               | Page 5,6 / Line 108,109,119,120     | Methods / Paragraph 2<br>Supplemental table S1 |
| Study selection           | 9       | State the process for selecting studies (i.e., screening, eligibility, included in systematic review, and, if applicable, included in the meta-analysis).                                                                                                                                                   | Page 6 / Line 116-122               | Methods / Paragraph 3                          |
| Data collection process   | 10      | Describe method of data extraction from reports (e.g., piloted forms, independently, in duplicate) and any processes for obtaining and confirming data from investigators.                                                                                                                                  | Page 6,7 / Line 125,126,137,138     | Methods / Paragraph 4                          |
| Data items                | 11      | List and define all variables for which data were sought (e.g., PICOS, funding sources) and any assumptions and simplifications made.                                                                                                                                                                       | Page 6 / Line 126-133               | Methods / Paragraph 4                          |

|                                    |    |                                                                                                                                                                                                                        |                                                  |                                                     |
|------------------------------------|----|------------------------------------------------------------------------------------------------------------------------------------------------------------------------------------------------------------------------|--------------------------------------------------|-----------------------------------------------------|
| Risk of bias in individual studies | 12 | Describe methods used for assessing risk of bias of individual studies (including specification of whether this was done at the study or outcome level), and how this information is to be used in any data synthesis. | Page 7 / Line 133-137                            | Methods / Paragraph 4                               |
| Summary measures                   | 13 | State the principal summary measures (e.g., risk ratio, difference in means).                                                                                                                                          | Page 7 / Line 141                                | Methods / Paragraph 5                               |
| Synthesis of results               | 14 | Describe the methods of handling data and combining results of studies, if done, including measures of consistency (e.g., I <sup>2</sup> ) for each meta-analysis.                                                     | Page 7 / Line 148-151                            | Methods / Paragraph 5                               |
| Risk of bias across studies        | 15 | Specify any assessment of risk of bias that may affect the cumulative evidence (e.g., publication bias, selective reporting within studies).                                                                           | Page 8 / Line 162-164                            | Methods / Paragraph 7                               |
| Additional analyses                | 16 | Describe methods of additional analyses (e.g., sensitivity or subgroup analyses, meta-regression), if done, indicating which were pre-specified.                                                                       | Page 7,8 / Line 152-162                          | Methods / Paragraph 6,7                             |
| <b>RESULTS</b>                     |    |                                                                                                                                                                                                                        |                                                  |                                                     |
| Study selection                    | 17 | Give numbers of studies screened, assessed for eligibility, and included in the review, with reasons for exclusions at each stage, ideally with a flow diagram.                                                        | Page 8,9 / Line 174-181                          | Results / Paragraph 1<br>Figure 1                   |
| Study characteristics              | 18 | For each study, present characteristics for which data were extracted (e.g., study size, PICOS, follow-up period) and provide the citations.                                                                           | Page 9,10 / Line 182-205                         | Results / Paragraph 2-4<br>Table S2 and S3          |
| Risk of bias within studies        | 19 | Present data on risk of bias of each study and, if available, any outcome level assessment (see item 12).                                                                                                              | Page 10 / Line 208-213                           | Results / Paragraph 5<br>Table S4                   |
| Results of individual studies      | 20 | For all outcomes considered (benefits or harms), present, for each study: (a) simple summary data for each intervention group (b) effect estimates and confidence intervals, ideally with a forest plot.               | Page 10,11 / Line 216-221                        | Results / Paragraph 6<br>Figure 2 and 4             |
| Synthesis of results               | 21 | Present results of each meta-analysis done, including confidence intervals and measures of consistency.                                                                                                                | Page 11 / Line 221-224<br>Page 13 / Line 262-264 | Results / Paragraph 6,9;<br>Figure 2 and 4          |
| Risk of bias across studies        | 22 | Present results of any assessment of risk of bias across studies (see Item 15).                                                                                                                                        | Page 11 / Line 224-226,<br>229-231               | Results / Paragraph 6<br>Figure S2                  |
| Additional analysis                | 23 | Give results of additional analyses, if done (e.g., sensitivity or subgroup analyses, meta-regression [see Item 16]).                                                                                                  | Page 11-13 / Line 226-228,<br>232-243, 252-255   | Results / Paragraph 6,7<br>Table 1, Figure 3 and S1 |
| <b>DISCUSSION</b>                  |    |                                                                                                                                                                                                                        |                                                  |                                                     |
| Summary of evidence                | 24 | Summarize the main findings including the strength of evidence for each main outcome; consider their relevance to key groups (e.g., healthcare providers, users, and policy makers).                                   | Page 13-17 / Line 267-335                        | Discussion / Paragraph 1-5                          |
| Limitations                        | 25 | Discuss limitations at study and outcome level (e.g., risk of bias), and at review-level (e.g., incomplete retrieval of identified research, reporting bias).                                                          | Page 17,18 / Line 338-357                        | Discussion / Paragraph 6                            |
| Conclusions                        | 26 | Provide a general interpretation of the results in the context of other evidence, and implications for future research.                                                                                                | Page 18 / Line 360-364                           | Conclusion / Paragraph 1                            |

| FUNDING |    |                                                                                                                                            |                        |         |
|---------|----|--------------------------------------------------------------------------------------------------------------------------------------------|------------------------|---------|
| Funding | 27 | Describe sources of funding for the systematic review and other support (e.g., supply of data); role of funders for the systematic review. | Page 19 / Line 380,381 | Funding |

**From:** Moher D, Liberati A, Tetzlaff J, Altman DG, The PRISMA Group (2009). Preferred Reporting Items for Systematic Reviews and Meta-Analyses: The PRISMA Statement. PLoS Med 6(7): e1000097. doi:10.1371/journal.pmed1000097

For more information, visit: [www.prisma-statement.org](http://www.prisma-statement.org).

Please leave this space alone as it will be supplemented by the editorial office when needed.

For peer review only

**Table S1** Search strategy**Search term**

1. (Oral health) OR (periodontal disease) OR (periodontal health) OR (periodontitis)  
OR (clinical attachment level) OR (alveolar bone loss) OR (probing depth)
2. (Respiratory disease) OR (chronic obstructive pulmonary disease) OR (pulmonary  
function) OR (airflow limitation)
3. 1 AND 2

For peer review only

**Table S2** Characteristics of included studies

| Year / Study                               | Design          | Location      | No. COPD /<br>Control subjects | Age (COPD /<br>Control subjects) | Assessment of<br>PD       | Assessment of<br>COPD |
|--------------------------------------------|-----------------|---------------|--------------------------------|----------------------------------|---------------------------|-----------------------|
| 1998 Hayes <i>et al</i> <sup>1</sup>       | Case-control    | United States | 261/857                        | 45.1±9.7/42.2±9.1                | ABL                       | FEV1                  |
| 1998 Scannapieco <i>et al</i> <sup>2</sup> | Cross-sectional | United States | 77/309                         | NA                               | OHI                       | Self-reported         |
| 2001 Garcia <i>et al</i> <sup>3</sup>      | Case-control    | United States | 279/833                        | NA                               | ABL, PPD                  | FEV1                  |
| 2001 Scannapieco <i>et al</i> <sup>4</sup> | Cross-sectional | United States | 810/12,982                     | 51.2±17.9/43.9±17.7              | CAL, GB                   | Self-reported         |
| 2004 Hyman <i>et al</i> <sup>5</sup>       | Cross-sectional | United States | 993/6,632                      | 62.3±14.1/47.4±14.2              | CAL                       | GOLD                  |
| 2008 Leuckfeld <i>et al</i> <sup>6</sup>   | Cross-sectional | Norway        | 130/50                         | 54.9±4.9/47.0±9.8                | ABL                       | GOLD                  |
| 2009 Deo <i>et al</i> <sup>7</sup>         | Case-control    | India         | 150/50                         | 41.4±7.5/43.6±5.5                | CAL, GB                   | FEV1 / FVC            |
| 2009 Wang <i>et al</i> <sup>8</sup>        | Case-control    | China         | 306/328                        | 63.9±9.8/63.3±9.0                | CAL, PLI                  | GOLD                  |
| 2012 Liu <i>et al</i> <sup>9</sup>         | Case-control    | China         | 183/209*                       | 64.3±10.1/63.6±9.7*              | CAL, PPD, BI              | GOLD                  |
| 2012 Si <i>et al</i> <sup>10</sup>         | Case-control    | China         | 581/438                        | 63.9±9.4/62.8±9.5                | CAL, ABL, PPD,<br>PLI, BI | GOLD                  |
| 2012 Zhou <i>et al</i> <sup>11</sup>       | Case-control    | China         | 193/181                        | 63.6±10.3/62.1±9.1               | CAL, ABL, PPD,<br>PLI, BI | GOLD                  |
| 2013 Barros <i>et al</i> <sup>12</sup>     | Cohort          | United States | 399/1,236 <sup>§</sup>         | 63.9±5.7/66.0±5.1 <sup>#</sup>   | CAL, PPD                  | GOLD                  |
| 2013 Ledić <i>et al</i> <sup>13</sup>      | Case-control    | Croatia       | 93/43                          | 65.8±9.7/62.1±11.9               | CAL                       | GOLD                  |
| 2016 Chung <i>et al</i> <sup>14</sup>      | Cross-sectional | Korea         | 697/5,181                      | 64.3±0.2/54.6±0.1                | PPD, GB                   | GOLD                  |
| 2018 AbdelHalim <i>et al</i> <sup>15</sup> | Cross-sectional | Egypt         | 134/116*                       | 56.8±10.4/55.3±9.1*              | CAL, PPD, BI,<br>PLI, OHI | GOLD                  |
| 2018 Harland <i>et al</i> <sup>16</sup>    | Cross-sectional | Japan         | 149/1,325                      | 61.3±9.1/54.5±8.7                | PPD                       | GOLD                  |

|    |                                                 |                 |        |                     |                    |               |               |
|----|-------------------------------------------------|-----------------|--------|---------------------|--------------------|---------------|---------------|
| 1  |                                                 |                 |        |                     |                    |               |               |
| 2  |                                                 |                 |        |                     |                    |               |               |
| 3  |                                                 |                 |        |                     |                    |               |               |
| 4  | 2018 Lopez-de-Andrés <i>et al</i> <sup>17</sup> | Case-control    | Spain  | 2,699/2,699         | 63±14/61±14        | Self-reported | Self-reported |
| 5  |                                                 |                 |        |                     |                    |               |               |
| 6  | 2019 Bomble <i>et al</i> <sup>18</sup>          | Case-control    | India  | 39/78               | NA                 | CAL, OHI, PPD | GOLD          |
| 7  |                                                 |                 |        |                     |                    |               |               |
| 8  |                                                 |                 |        |                     |                    |               |               |
| 9  | 2019 Takeuchi <i>et al</i> <sup>19</sup>        | Cohort          | Japan  | 22/878              | NA                 | CAL, PPD      | GOLD          |
| 10 |                                                 |                 |        |                     |                    |               |               |
| 11 |                                                 |                 |        |                     |                    |               |               |
| 12 | 2020 Jung <i>et al</i> <sup>20</sup>            | Cross-sectional | Korea  | 1,134/6,585         | 62.6±0.4/53.6±0.2  | PPD           | FEV1 / FVC    |
| 13 |                                                 |                 |        |                     |                    |               |               |
| 14 | 2020 Qian <i>et al</i> <sup>21</sup>            | Cohort          | China  | 23 <sup>‡</sup> /NA | 83.1±4.8/80.3±3.7  | ABL           | NR            |
| 15 |                                                 |                 |        |                     |                    |               |               |
| 16 |                                                 |                 |        |                     |                    |               |               |
| 17 | 2020 Winning <i>et al</i> <sup>22</sup>         | Cross-sectional | Sweden | 86/740              | NA                 | ABL           | GOLD          |
| 18 |                                                 |                 |        |                     |                    |               |               |
| 19 |                                                 |                 |        |                     |                    |               |               |
| 20 | 2020 Zhou <i>et al</i> <sup>23</sup>            | Case-control    | China  | 60/60               | 63.1±10.1/60.0±9.4 | CAL, PLI      | GOLD          |
| 21 |                                                 |                 |        |                     |                    |               |               |
| 22 | 2021 Kataoka <i>et al</i> <sup>24</sup>         | Cross-sectional | Japan  | 464/249             | 54.1±9.4/NA        | PPD           | GOLD          |
| 23 |                                                 |                 |        |                     |                    |               |               |

24 Continuous data are presented as mean ± standard deviation (SD) unless otherwise indicated.

25 \*No. COPD subjects with frequent exacerbation (≥2 exacerbations in the last year)/Infrequent exacerbation (<2  
26 exacerbations in the last year).

27  
28 <sup>§</sup>No. COPD subjects with events (hospitalization for exacerbation or COPD-related death) in the 5-year follow-up  
29 visit/COPD subjects without events in the 5-year follow-up visit.

30  
31 <sup>‡</sup>No. COPD-related mortality in a follow-up visit more than 5 years.

32 ABL, alveolar bone loss; BI, bleeding index; CAL, clinical attachment level; FEV1, forced expiratory volume in 1  
33 second; FVC, forced vital capacity; GB, gingival bleeding; GOLD, Global Initiative for Chronic Obstructive Lung  
34 Disease; NA, not available; OHI, oral health index; PD, periodontal disease; PLI, plaque index; PPD, probing  
35 pocket depth.  
36  
37  
38  
39  
40  
41  
42  
43  
44  
45  
46  
47  
48  
49  
50  
51  
52  
53  
54  
55  
56  
57  
58  
59  
60

**Table S3** Adjustment for confounders of included studies

| Study Author                               | Covariates in logistic regression multivariable model                                                                                                      |
|--------------------------------------------|------------------------------------------------------------------------------------------------------------------------------------------------------------|
| Hayes <i>et al</i> <sup>1</sup>            | Age, smoking, education, height                                                                                                                            |
| Scannapieco <i>et al</i> <sup>2</sup>      | Smoking                                                                                                                                                    |
| Garcia <i>et al</i> <sup>3</sup>           | Age, height, alcohol, education ( <b>with stratified analysis on smoking</b> )                                                                             |
| Leuckfeld <i>et al</i> <sup>6</sup>        | Age, female gender, <b>pack years of smoking</b>                                                                                                           |
| Deo <i>et al</i> <sup>7</sup>              | Age, gender and smoking                                                                                                                                    |
| Liu <i>et al</i> <sup>9</sup>              | Age, gender, BMI and smoking                                                                                                                               |
| Wang <i>et al</i> <sup>8</sup>             | Age, gender, BMI ( <b>with stratified analysis on smoking</b> )                                                                                            |
| Si <i>et al</i> <sup>10</sup>              | Age, gender, occupation, educational level ( <b>with stratified analysis on smoking</b> )                                                                  |
| Zhou <i>et al</i> <sup>11</sup>            | Age, gender, smoking, BMI, season ( <b>with stratified analysis on smoking</b> )                                                                           |
| Ledić <i>et al</i> <sup>13</sup>           | Age, gender, <b>pack years of smoking</b> , BMI                                                                                                            |
| Lopez-de-Andrés <i>et al</i> <sup>17</sup> | Age, gender, smoking, educational level, DM, obesity                                                                                                       |
| Bomble <i>et al</i> <sup>18</sup>          | Smoking                                                                                                                                                    |
| Zhou <i>et al</i> <sup>23</sup>            | Age, gender, smoking, BMI                                                                                                                                  |
| Kataoka <i>et al</i> <sup>24</sup>         | Age, smoking                                                                                                                                               |
| Qian <i>et al</i> <sup>21</sup>            | Age, sex, education levels, BMI, smoking, drinking, hypertension, DM                                                                                       |
| Barros <i>et al</i> <sup>12</sup>          | Age, gender, Race, BMI, education, <b>pack years of smoking</b> , hypertension                                                                             |
| Scannapieco <i>et al</i> <sup>4</sup>      | Age, gender, <b>pack years of smoking</b> , Race, education, income, dental visits, alcohol, DM                                                            |
| Hyman <i>et al</i> <sup>5</sup>            | Age, gender, Race, history of hypertension and heart attack, dental visit within 1 year, BMI, family income ( <b>with stratified analysis on smoking</b> ) |
| Chung <i>et al</i> <sup>14</sup>           | Age, smoking, family income, education, alcohol, exercise, BMI, tooth brushing frequency, DM, number of natural teeth                                      |
| Harland <i>et al</i> <sup>16</sup>         | Age, number of present teeth, BMI, alcohol consumption, occupation,                                                                                        |



---

|                                       |                                                                                                                                                                                                                               |
|---------------------------------------|-------------------------------------------------------------------------------------------------------------------------------------------------------------------------------------------------------------------------------|
|                                       | hypertension, DM ( <b>with stratified analysis on smoking</b> )                                                                                                                                                               |
| Takeuchi <i>et al</i> <sup>19</sup>   | Age, gender, <b>pack years of smoking</b> , occupation, DM, BMI, physical activity, alcohol intake, number of present teeth                                                                                                   |
| Jung <i>et al</i> <sup>20</sup>       | Age, gender, smoking, educational level, household income, alcohol consumption, periodontal status, number of missing teeth, oral health factors                                                                              |
| Winning <i>et al</i> <sup>22</sup>    | Age, gender, smoking, height, BMI, exercise, DM, hypertension, MI, education level, living condition                                                                                                                          |
| AbdelHalim <i>et al</i> <sup>15</sup> | Age, BMI, low-level of education, <b>pack years of smoking</b> , MRC, CAT, hospitalizations, COPD category (C-D), FVC (% predicted), FEV1 (% predicted), FEV1 / FVC (% predicted), MMEF (% predicted), PEF (% predicted), CRP |

---

BMI, body mass index; CAT, chronic obstructive pulmonary disease assessment test; CRP, C-reactive protein; DM, diabetes mellitus; FEV1, forced expiratory volume in 1 second; FVC, forced vital capacity; MI, myocardial infarction; MMEF, maximum mid-expiratory flow; MRC, Medical Research Council; PEF, peak expiratory flow.

**Bold:** the covariate of smoking intensity (duration and dose) or stratified analyses on smoking status.

**Table S4** Quality assessment based on the Newcastle-Ottawa Scale

(A) Cohort study

| Study<br>Author                     | Selection         |                      |                              |                        | Comparability | Outcome                  |                        |                             | Total<br>score |
|-------------------------------------|-------------------|----------------------|------------------------------|------------------------|---------------|--------------------------|------------------------|-----------------------------|----------------|
|                                     | Exposed<br>cohort | Nonexposed<br>cohort | Ascertainment<br>of exposure | Outcome<br>of interest |               | Assessment<br>of outcome | Length of<br>follow-up | Adequacy<br>of<br>follow-up |                |
| Barros <i>et al</i> <sup>12</sup>   | *                 | *                    | *                            | ...                    | ...           | *                        | *                      | *                           | 6              |
| Sukeuchi <i>et al</i> <sup>19</sup> | *                 | *                    | *                            | *                      | ...           | *                        | *                      | *                           | 7              |
| Qian <i>et al</i> <sup>21</sup>     | ...               | *                    | *                            | ...                    | ...           | *                        | *                      | ...                         | 4              |

(B) Case-control / cross-sectional study

| Study<br>Author                            | Selection          |                                         |                      |                       | Comparability | Outcome                      |                                                                 |                       | Total<br>score |
|--------------------------------------------|--------------------|-----------------------------------------|----------------------|-----------------------|---------------|------------------------------|-----------------------------------------------------------------|-----------------------|----------------|
|                                            | Case<br>definition | Representati-<br>veness of the<br>cases | Control<br>selection | Control<br>definition |               | Ascertainment<br>of exposure | Same method<br>of<br>ascertainment<br>for cases and<br>controls | Non-resp<br>onse rate |                |
| Hayes <i>et al</i> <sup>1</sup>            | *                  | ...                                     | *                    | *                     | *             | *                            | *                                                               | *                     | 7              |
| Scarpapico <i>et al</i> <sup>2</sup>       | ...                | *                                       | *                    | *                     | ...           | *                            | *                                                               | ...                   | 5              |
| García <i>et al</i> <sup>3</sup>           | *                  | ...                                     | *                    | *                     | *             | *                            | *                                                               | *                     | 7              |
| Scarpapico <i>et al</i> <sup>4</sup>       | ...                | *                                       | *                    | *                     | ...           | *                            | *                                                               | *                     | 6              |
| Hynnian <i>et al</i> <sup>5</sup>          | *                  | *                                       | *                    | *                     | ...           | *                            | *                                                               | *                     | 7              |
| Leukfeld <i>et al</i> <sup>6</sup>         | *                  | ...                                     | ...                  | *                     | ...           | *                            | *                                                               | *                     | 5              |
| Deo <i>et al</i> <sup>7</sup>              | *                  | *                                       | ...                  | *                     | *             | *                            | *                                                               | *                     | 7              |
| Wang <i>et al</i> <sup>8</sup>             | *                  | *                                       | ...                  | *                     | *             | *                            | *                                                               | *                     | 7              |
| Liu <i>et al</i> <sup>9</sup>              | *                  | *                                       | ...                  | *                     | *             | *                            | *                                                               | *                     | 7              |
| Si <i>et al</i> <sup>10</sup>              | *                  | *                                       | ...                  | *                     | *             | *                            | *                                                               | *                     | 7              |
| Zhou <i>et al</i> <sup>11</sup>            | *                  | *                                       | ...                  | *                     | *             | *                            | *                                                               | *                     | 7              |
| Lečić <i>et al</i> <sup>13</sup>           | *                  | *                                       | ...                  | *                     | *             | *                            | *                                                               | *                     | 7              |
| Chung <i>et al</i> <sup>14</sup>           | *                  | *                                       | *                    | *                     | ...           | *                            | *                                                               | *                     | 7              |
| Abdel Halim <i>et al</i> <sup>15</sup>     | *                  | ...                                     | ...                  | *                     | ...           | *                            | *                                                               | *                     | 5              |
| Harland <i>et al</i> <sup>16</sup>         | *                  | *                                       | ...                  | *                     | ...           | *                            | *                                                               | *                     | 6              |
| Lopez-de-Andrés <i>et al</i> <sup>14</sup> | ...                | *                                       | *                    | *                     | *             | ...                          | *                                                               | *                     | 6              |
| Bomble <i>et al</i> <sup>18</sup>          | *                  | *                                       | ...                  | *                     | **            | *                            | *                                                               | *                     | 8              |
| Wang <i>et al</i> <sup>20</sup>            | ...                | *                                       | *                    | *                     | ...           | *                            | *                                                               | *                     | 6              |
| Wang <i>et al</i> <sup>22</sup>            | *                  | *                                       | *                    | *                     | ...           | *                            | *                                                               | *                     | 7              |

1  
2  
3  
4  
5  
6  
7  
8  
9  
10  
11  
12  
13  
14  
15  
16  
17  
18  
19  
20  
21  
22  
23  
24  
25  
26  
27  
28  
29  
30  
31  
32  
33  
34  
35  
36  
37  
38  
39  
40  
41  
42  
43  
44  
45  
46  
47  
48  
49  
50  
51  
52  
53  
54  
55  
56  
57  
58  
59  
60

|                                   |   |   |     |     |     |   |   |   |   |
|-----------------------------------|---|---|-----|-----|-----|---|---|---|---|
| Zhou <i>et al</i> <sup>23</sup>   | * | * | ... | ... | **  | * | * | * | 7 |
| Kaboka <i>et al</i> <sup>24</sup> | * | * | *   | *   | ... | * | * | * | 7 |

For peer review only

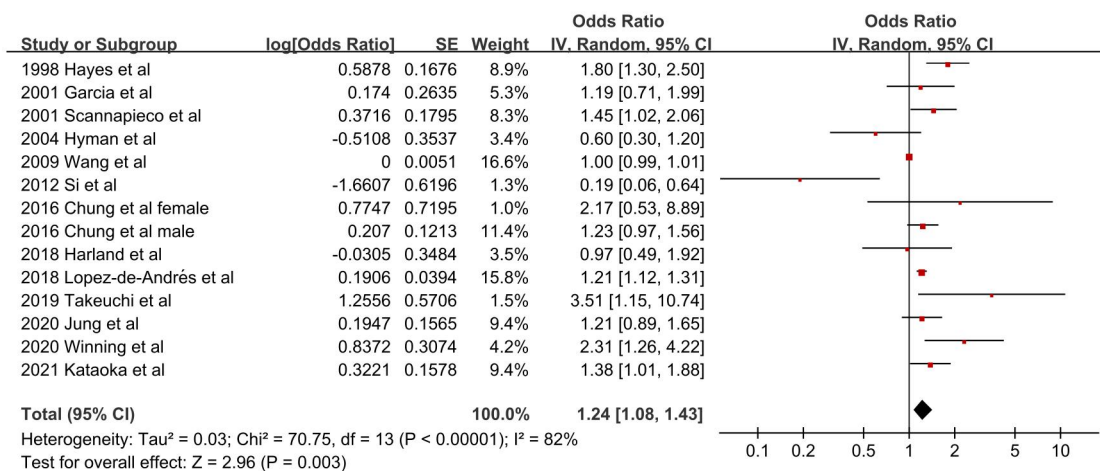

**Figure S1** Sensitivity analysis on studies with larger sample size ( $N \geq 500$ ). Values more than one indicate a higher risk of COPD in patients with PD.

1  
2  
3  
4  
5  
6  
7  
8  
9  
10  
11  
12  
13  
14  
15  
16  
17  
18  
19  
20  
21  
22  
23  
24  
25  
26  
27  
28  
29  
30  
31  
32  
33  
34  
35  
36  
37  
38  
39  
40  
41  
42  
43  
44  
45  
46  
47  
48  
49  
50  
51  
52  
53  
54  
55  
56  
57  
58  
59  
60

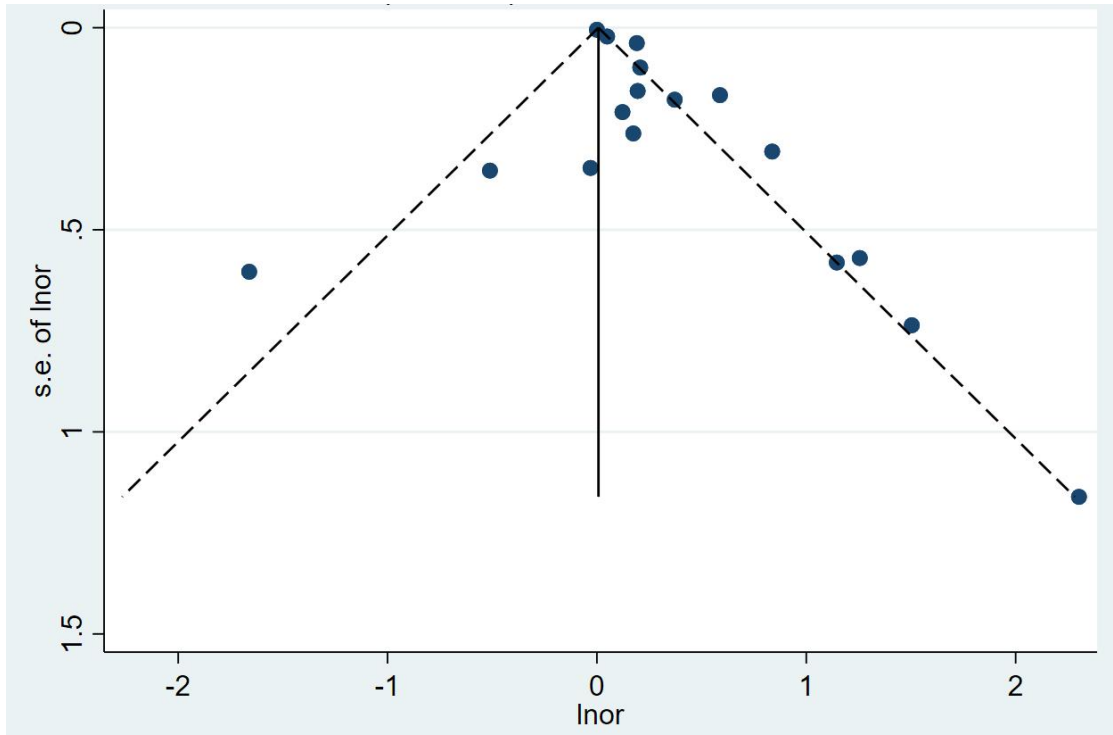

Figure S2 Funnel plot for risk of COPD, with pseudo 95% confidence limits.

## References

1. Hayes C, Sparrow D, Cohen M, *et al*. The association between alveolar bone loss and pulmonary function: the VA Dental Longitudinal Study. *Ann Periodontol* 1998;3:257-61.
2. Scannapieco FA, Papandonatos GD, Dunford RG. Associations between oral conditions and respiratory disease in a national sample survey population. *Ann Periodontol* 1998;3:251-6.
3. Garcia RI, Nunn ME, Vokonas PS. Epidemiologic associations between periodontal disease and chronic obstructive pulmonary disease. *Ann Periodontol* 2001;6:71-7.
4. Scannapieco FA, Ho AW. Potential associations between chronic respiratory disease and periodontal disease: analysis of National Health and Nutrition Examination Survey III. *J Periodontol* 2001;72:50-6.
5. Hyman JJ, Reid BC. Cigarette smoking, periodontal disease: and chronic obstructive pulmonary disease. *J Periodontol* 2004;75:9-15.
6. Leuckfeld I, Obregon-Whittle MV, Lund MB, *et al*. Severe chronic obstructive pulmonary disease: association with marginal bone loss in periodontitis. *Respir Med* 2008;102:488-94.
7. Deo V, Bhongade ML, Ansari S, *et al*. Periodontitis as a potential risk factor for chronic obstructive pulmonary disease: a retrospective study. *Indian J Dent Res* 2009;20:466-70.
8. Wang Z, Zhou X, Zhang J, *et al*. Periodontal health, oral health behaviours, and chronic obstructive pulmonary disease. *J Clin Periodontol* 2009;36:750-5.
9. Liu Z, Zhang W, Zhang J, *et al*. Oral hygiene, periodontal health and chronic obstructive pulmonary disease exacerbations. *J Clin Periodontol* 2012;39:45-52.
10. Si Y, Fan H, Song Y, *et al*. Association between periodontitis and chronic obstructive pulmonary disease in a Chinese population. *J Periodontol* 2012;83:1288-96.
11. Zhou X, Han J, Song Y, *et al*. Serum levels of 25-hydroxyvitamin D, oral health and chronic obstructive pulmonary disease. *J Clin Periodontol* 2012;39:350-6.
12. Barros SP, Suruki R, Loewy ZG, *et al*. A cohort study of the impact of tooth loss and periodontal disease on respiratory events among COPD subjects: modulatory role of systemic biomarkers of inflammation. *PLoS One* 2013;8:e68592.
13. Ledić K, Marinković S, Puhar I, *et al*. Periodontal disease increases risk for chronic obstructive pulmonary disease. *Coll Antropol* 2013;37:937-42.

- 1
- 2
- 3
- 4 14. Chung JH, Hwang HJ, Kim SH, *et al.* Associations Between Periodontitis and Chronic
- 5 Obstructive Pulmonary Disease: The 2010 to 2012 Korean National Health and Nutrition
- 6 Examination Survey. *J Periodontol* 2016;87:864-71.
- 7
- 8
- 9 15. AbdelHalim H, AboElNaga H, Aggour R. Chronic obstructive pulmonary disease
- 10 exacerbations and periodontitis: a possible association. *The Egyptian Journal of Bronchology*
- 11 2018.
- 12
- 13
- 14
- 15 16. Harland J, Furuta M, Takeuchi K, *et al.* Periodontitis modifies the association between
- 16 smoking and chronic obstructive pulmonary disease in Japanese men. *J Oral Sci*
- 17 2018;60:226-31.
- 18
- 19
- 20
- 21 17. Lopez-de-Andrés A, Vazquez-Vazquez L, Martinez-Huedo MA, *et al.* Is COPD associated
- 22 with periodontal disease? A population-based study in Spain. *Int J Chron Obstruct Pulmon*
- 23 *Dis* 2018;13:3435-45.
- 24
- 25
- 26
- 27 18. Bomble N, Shetiya SH, Agarwal DR. Association of periodontal status with lung function in
- 28 patients with and without chronic obstructive pulmonary disease visiting a medical hospital in
- 29 Pune: A comparative study. *J Indian Soc Periodontol* 2020;24:67-71.
- 30
- 31
- 32
- 33 19. Takeuchi K, Matsumoto K, Furuta M, *et al.* Periodontitis Is Associated with Chronic
- 34 Obstructive Pulmonary Disease. *J Dent Res* 2019;98:534-40.
- 35
- 36
- 37 20. Jung ES, Lee KH, Choi YY. Association between oral health status and chronic obstructive
- 38 pulmonary disease in Korean adults. *Int Dent J* 2020;70:208-13.
- 39
- 40
- 41 21. Qian Y, Yuan W, Mei N, *et al.* Periodontitis increases the risk of respiratory disease mortality
- 42 in older patients. *Exp Gerontol* 2020;133:110878.
- 43
- 44
- 45 22. Winning L, Polyzois I, Sanmartin Berglund J, *et al.* Periodontitis and airflow limitation in
- 46 older Swedish individuals. *J Clin Periodontol* 2020;47:715-25.
- 47
- 48
- 49 23. Zhou X, Wang J, Liu W, *et al.* Periodontal Status and Microbiologic Pathogens in Patients
- 50 with Chronic Obstructive Pulmonary Disease and Periodontitis: A Case-Control Study. *Int J*
- 51 *Chron Obstruct Pulmon Dis* 2020;15:2071-9.
- 52
- 53
- 54 24. Kataoka S, Kimura M, Yamaguchi T, *et al.* A cross-sectional study of relationships between
- 55 periodontal disease and general health: The Hitachi Oral Healthcare Survey. *BMC Oral Health*
- 56 2021;21:644.
- 57
- 58
- 59
- 60

# BMJ Open

## The association between chronic obstructive pulmonary disease and periodontal disease: a systematic review and meta-analysis

|                                 |                                                                                                                                                                                                                                                                                                                                                                                                                                                                                                                                                                                                                                                                                                             |
|---------------------------------|-------------------------------------------------------------------------------------------------------------------------------------------------------------------------------------------------------------------------------------------------------------------------------------------------------------------------------------------------------------------------------------------------------------------------------------------------------------------------------------------------------------------------------------------------------------------------------------------------------------------------------------------------------------------------------------------------------------|
| Journal:                        | <i>BMJ Open</i>                                                                                                                                                                                                                                                                                                                                                                                                                                                                                                                                                                                                                                                                                             |
| Manuscript ID                   | bmjopen-2022-067432.R1                                                                                                                                                                                                                                                                                                                                                                                                                                                                                                                                                                                                                                                                                      |
| Article Type:                   | Original research                                                                                                                                                                                                                                                                                                                                                                                                                                                                                                                                                                                                                                                                                           |
| Date Submitted by the Author:   | 25-Feb-2023                                                                                                                                                                                                                                                                                                                                                                                                                                                                                                                                                                                                                                                                                                 |
| Complete List of Authors:       | Yang, Mei; Sichuan University West China Hospital, Department of Respiratory and Critical Care Medicine<br>Peng, Ran; Sichuan University West China Hospital, Department of Respiratory and Critical Care Medicine; 363 Hospital, Department of Respiratory and Critical Care Medicine<br>Li, Xiaoou; Sichuan University West China Hospital, Department of Respiratory and Critical Care Medicine<br>Peng, Junjie; Sichuan University West China Hospital, Department of Respiratory and Critical Care Medicine<br>Liu, Lin; 363 Hospital, Department of Respiratory and Critical Care Medicine<br>Chen, Lei; Sichuan University West China Hospital, Department of Respiratory and Critical Care Medicine |
| <b>Primary Subject Heading</b>: | Respiratory medicine                                                                                                                                                                                                                                                                                                                                                                                                                                                                                                                                                                                                                                                                                        |
| Secondary Subject Heading:      | Public health, Smoking and tobacco, Dentistry and oral medicine                                                                                                                                                                                                                                                                                                                                                                                                                                                                                                                                                                                                                                             |
| Keywords:                       | Chronic airways disease < THORACIC MEDICINE, RESPIRATORY MEDICINE (see Thoracic Medicine), ORAL MEDICINE, Emphysema < THORACIC MEDICINE                                                                                                                                                                                                                                                                                                                                                                                                                                                                                                                                                                     |
|                                 |                                                                                                                                                                                                                                                                                                                                                                                                                                                                                                                                                                                                                                                                                                             |

SCHOLARONE™  
Manuscripts





I, the Submitting Author has the right to grant and does grant on behalf of all authors of the Work (as defined in the below author licence), an exclusive licence and/or a non-exclusive licence for contributions from authors who are: i) UK Crown employees; ii) where BMJ has agreed a CC-BY licence shall apply, and/or iii) in accordance with the terms applicable for US Federal Government officers or employees acting as part of their official duties; on a worldwide, perpetual, irrevocable, royalty-free basis to BMJ Publishing Group Ltd ("BMJ") its licensees and where the relevant Journal is co-owned by BMJ to the co-owners of the Journal, to publish the Work in this journal and any other BMJ products and to exploit all rights, as set out in our [licence](#).

The Submitting Author accepts and understands that any supply made under these terms is made by BMJ to the Submitting Author unless you are acting as an employee on behalf of your employer or a postgraduate student of an affiliated institution which is paying any applicable article publishing charge ("APC") for Open Access articles. Where the Submitting Author wishes to make the Work available on an Open Access basis (and intends to pay the relevant APC), the terms of reuse of such Open Access shall be governed by a Creative Commons licence – details of these licences and which [Creative Commons](#) licence will apply to this Work are set out in our licence referred to above.

Other than as permitted in any relevant BMJ Author's Self Archiving Policies, I confirm this Work has not been accepted for publication elsewhere, is not being considered for publication elsewhere and does not duplicate material already published. I confirm all authors consent to publication of this Work and authorise the granting of this licence.

1  
2  
3  
4  
5 **1 Title Page**  
6

7 **2 Title:** The association between chronic obstructive pulmonary disease and periodontal  
8  
9  
10  
11  
12  
13  
14  
15  
16  
17  
18  
19  
20  
21  
22  
23  
24  
25  
26  
27  
28  
29  
30  
31  
32  
33  
34  
35  
36  
37  
38  
39  
40  
41  
42  
43  
44  
45  
46  
47  
48  
49  
50  
51  
52  
53  
54  
55  
56  
57  
58  
59  
60

3 disease: a systematic review and meta-analysis

4  
5 **Authors' full names:** Mei Yang<sup>1\*</sup>, Ran Peng<sup>1,2\*</sup>, Xiaoou Li<sup>1\*</sup>, Junjie Peng<sup>1</sup>, Lin Liu<sup>2#</sup>,  
6  
7  
8  
9  
10  
11  
12  
13  
14  
15  
16  
17  
18  
19  
20  
21  
22  
23  
24  
25  
26  
27  
28  
29  
30  
31  
32  
33  
34  
35  
36  
37  
38  
39  
40  
41  
42  
43  
44  
45  
46  
47  
48  
49  
50  
51  
52  
53  
54  
55  
56  
57  
58  
59  
60

6 Lei Chen<sup>1#</sup>

7 **Authors' affiliations:** <sup>1</sup>Department of Respiratory and Critical Care Medicine, West  
8  
9  
10  
11  
12  
13  
14  
15  
16  
17  
18  
19  
20  
21  
22  
23  
24  
25  
26  
27  
28  
29  
30  
31  
32  
33  
34  
35  
36  
37  
38  
39  
40  
41  
42  
43  
44  
45  
46  
47  
48  
49  
50  
51  
52  
53  
54  
55  
56  
57  
58  
59  
60

8 China Hospital, West China School of Medicine, Sichuan University, Chengdu, Sichuan  
9  
10  
11  
12  
13  
14  
15  
16  
17  
18  
19  
20  
21  
22  
23  
24  
25  
26  
27  
28  
29  
30  
31  
32  
33  
34  
35  
36  
37  
38  
39  
40  
41  
42  
43  
44  
45  
46  
47  
48  
49  
50  
51  
52  
53  
54  
55  
56  
57  
58  
59  
60

9 610041, China.

10 <sup>2</sup>Department of Respiratory and Critical Care Medicine, 363 Hospital, Chengdu, Sichuan  
11  
12  
13  
14  
15  
16  
17  
18  
19  
20  
21  
22  
23  
24  
25  
26  
27  
28  
29  
30  
31  
32  
33  
34  
35  
36  
37  
38  
39  
40  
41  
42  
43  
44  
45  
46  
47  
48  
49  
50  
51  
52  
53  
54  
55  
56  
57  
58  
59  
60

11 610041, China

12  
13  
14  
15  
16  
17  
18  
19  
20  
21  
22  
23  
24  
25  
26  
27  
28  
29  
30  
31  
32  
33  
34  
35  
36  
37  
38  
39  
40  
41  
42  
43  
44  
45  
46  
47  
48  
49  
50  
51  
52  
53  
54  
55  
56  
57  
58  
59  
60

13 \* Contributed equally.

14  
15  
16  
17  
18  
19  
20  
21  
22  
23  
24  
25  
26  
27  
28  
29  
30  
31  
32  
33  
34  
35  
36  
37  
38  
39  
40  
41  
42  
43  
44  
45  
46  
47  
48  
49  
50  
51  
52  
53  
54  
55  
56  
57  
58  
59  
60

15 **#Correspondence to:** Lei Chen (lchens@126.com), Department of Respiratory and  
16  
17  
18  
19  
20  
21  
22  
23  
24  
25  
26  
27  
28  
29  
30  
31  
32  
33  
34  
35  
36  
37  
38  
39  
40  
41  
42  
43  
44  
45  
46  
47  
48  
49  
50  
51  
52  
53  
54  
55  
56  
57  
58  
59  
60

16 Critical Care Medicine, West China Hospital, West China School of Medicine, Sichuan  
17  
18  
19  
20  
21  
22  
23  
24  
25  
26  
27  
28  
29  
30  
31  
32  
33  
34  
35  
36  
37  
38  
39  
40  
41  
42  
43  
44  
45  
46  
47  
48  
49  
50  
51  
52  
53  
54  
55  
56  
57  
58  
59  
60

17 University, Chengdu, Sichuan 610041, China; Lin Liu (lliniu@126.com), Department  
18  
19  
20  
21  
22  
23  
24  
25  
26  
27  
28  
29  
30  
31  
32  
33  
34  
35  
36  
37  
38  
39  
40  
41  
42  
43  
44  
45  
46  
47  
48  
49  
50  
51  
52  
53  
54  
55  
56  
57  
58  
59  
60

18 of Respiratory and Critical Care Medicine, 363 Hospital, Chengdu, Sichuan 610041,  
19  
20  
21  
22  
23  
24  
25  
26  
27  
28  
29  
30  
31  
32  
33  
34  
35  
36  
37  
38  
39  
40  
41  
42  
43  
44  
45  
46  
47  
48  
49  
50  
51  
52  
53  
54  
55  
56  
57  
58  
59  
60

19 China

20  
21  
22  
23  
24  
25  
26  
27  
28  
29  
30  
31  
32  
33  
34  
35  
36  
37  
38  
39  
40  
41  
42  
43  
44  
45  
46  
47  
48  
49  
50  
51  
52  
53  
54  
55  
56  
57  
58  
59  
60

21 **Word count of the abstract:** 274

1  
2  
3  
4  
5 22 **Word count of the main text:** 3153  
6  
7

8 23  
9

10 24 **The association between chronic obstructive pulmonary**  
11  
12 **disease and periodontal disease: a systematic review and**  
13 25  
14 **meta-analysis**  
15 26  
16  
17

18 27  
19

20 28 **ABSTRACT**  
21  
22

23 29 **Objectives** Studies have suggested contradictory results on the relationship between  
24  
25 chronic obstructive pulmonary disease (COPD) and periodontal disease (PD). The aim  
26 30  
27 of this study was to determine whether PD increased the risk of COPD and COPD-  
28 31  
29 related clinical events.  
30  
31 32

32  
33 33 **Design** Systematic review and meta-analysis.  
34  
35

36 34 **Data sources** PubMed, EMBASE and CENTRAL were searched from inception to 22  
37  
38 February 2023.  
39 35  
40

41 36 **Eligibility criteria for studies** We included trials and observational studies evaluating  
42  
43 association of PD with the risk of COPD or COPD-related events (exacerbation and  
44 37  
45 mortality), with statistical adjustment for smoking.  
46 38  
47

48  
49 39 **Data extraction and synthesis** Two investigators independently extracted data from  
50  
51 selected studies using a standardized Excel file. Quality of studies was evaluated using  
52 40  
53 the Newcastle-Ottawa Scale. Odds ratio (OR) with 95% confident interval (CI) was  
54 41  
55 pooled in a random-effect model with inverse variance method.  
56 42  
57  
58  
59  
60

1  
2  
3  
4  
5 43 **Results** 22 observational studies with 51704 participants were included. Pooled analysis  
6  
7  
8 44 of 18 studies suggested that PD was weakly associated with the risk of COPD (OR 1.20,  
9  
10 45 95% CI 1.09 to 1.32). However, in stratified and subgroup analyses, with strict  
11  
12 46 adjustment for smoking, PD no longer related to the risk of COPD (adjusting for  
13  
14 47 smoking intensity: OR 1.14, 95% CI 0.86 to 1.51; smokers only: OR 1.46, 95% CI 0.92  
15  
16 48 to 2.31; never smokers only: OR 0.93, 95% CI 0.72 to 1.21). Moreover, PD did not  
17  
18 49 increase the risk of COPD-related exacerbation or mortality (OR 1.18, 95% CI 0.71 to  
19  
20 50 1.97) in the pooled result of four studies.  
21  
22  
23  
24  
25

26 51 **Conclusions** This study demonstrates PD confers no risk for COPD and COPD-related  
27  
28 52 events when strictly adjusted by smoking. Large-scale prospective cohort studies with  
29  
30 53 control of potential confounding factors are warranted to validate the present findings.  
31  
32  
33  
34  
35

## 36 55 **STRENGTHS AND LIMITATIONS OF THIS STUDY**

- 37  
38  
39 56 1. This is the largest systematic review and meta-analysis on association between  
40  
41 57 chronic obstructive pulmonary disease (COPD) and periodontal disease (PD)  
42  
43 58 collecting data over 20 years.  
44  
45  
46 59 2. This is the first meta-analysis investigating whether PD increases the risk of COPD-  
47  
48 60 related events (exacerbation or mortality).  
49  
50  
51 61 3. Compared with previous reports, this study was conducted with more strict  
52  
53 62 adjustment for confounding by smoking, which was the most important confounder  
54  
55 63 in the COPD-PD relationship.  
56  
57  
58  
59  
60

1  
2  
3  
4  
5 64 4. Our study provided limited evidence on the outcome of COPD-related events  
6  
7  
8 65 because of limited data.

9  
10 66 5. Clinical heterogeneity and publication bias compromised the evidence strength of  
11  
12 67 this study, although subgroup and stratified analyses were performed.

13  
14  
15 68

## 17 69 **INTRODUCTION**

20 70 Chronic obstructive pulmonary disease (COPD) is the third leading cause of death,  
21  
22 71 resulting in enormous economic burden.<sup>1</sup> Commonly, COPD coexists with a variety of  
23  
24 72 disorders, called comorbidities, which play significant roles in the progression and  
25  
26 73 prognosis of COPD.<sup>2,3</sup> Understanding the COPD-comorbidities relationship has been a  
27  
28 74 momentous prerequisite for optimizing disease prevention and management strategies.<sup>2</sup>  
29  
30  
31 75 <sup>3</sup>

32  
33  
34  
35  
36 76 Given ageing and widespread use of inhaled corticosteroids in COPD, periodontal  
37  
38 77 disease (PD) has been a common comorbidity of COPD.<sup>4</sup> It is a chronic inflammatory  
39  
40 78 condition of tissues surrounding and supporting the teeth, including gingiva, bone and  
41  
42 79 ligament,<sup>5</sup> with the prevalence estimates over 10% around the world and especially  
43  
44 80 prevalent in elderly individuals.<sup>6</sup> To date, diagnosis and assessment of PD are mostly  
45  
46 81 based on periodontal measurements including clinical attachment level (CAL), probing  
47  
48 82 pocket depth (PPD) and alveolar bone loss (ABL).<sup>5</sup> They are primary clinical  
49  
50 83 manifestations of PD, reflecting the extent of periodontal tissue destruction.<sup>5</sup>

51  
52  
53  
54  
55  
56  
57 84 Based on the nature of inflammation,<sup>5,7</sup> mounting evidence has shed light on the  
58  
59  
60

1  
2  
3  
4  
5 85 association between PD and development of COPD.<sup>8 9</sup> Currently three points are  
6  
7  
8 86 proposed. First, they share the same risk factors, such as age, gender, smoking and  
9  
10 87 socioeconomic status.<sup>2 10</sup> Second, they have similar pathogenetic mechanisms. Both  
11  
12 88 diseases are characterized by host susceptibility to environmental factors, immune  
13  
14  
15 89 overreaction, oxidative stress and production of pro-inflammatory cytokines.<sup>7 8</sup> Most  
16  
17  
18 90 importantly, neutrophilic inflammation plays a key role in both diseases.<sup>8 11</sup> Third, oral  
19  
20 91 bacteria released from the dental plaque in PD could trigger progression and acute  
21  
22  
23 92 exacerbation (AE) of COPD.<sup>12 13</sup>

24  
25  
26 93 Meanwhile, epidemiological evidence has indicated that PD increases risk of COPD<sup>11</sup>  
27  
28 94 <sup>14 15</sup> and COPD-related events.<sup>13 16</sup> Scannapieco *et al* revealed a 4.5-fold increased risk  
29  
30 95 of COPD in patients with PD, compared with those without.<sup>14</sup> A dose-response  
31  
32  
33 96 relationship was further implied between PD severity and lung function.<sup>15</sup> Among  
34  
35  
36 97 patients with both diseases, COPD-related AE and mortality also significantly linked  
37  
38  
39 98 with periodontal status.<sup>13 16</sup> Periodontal therapy, such as scaling and root planing  
40  
41  
42 99 treatment, may ameliorate lung function and decrease frequency of AE in COPD with  
43  
44  
45 100 chronic periodontitis.<sup>17 18</sup> However, there were some other studies revealing opposite  
46  
47  
48 101 results, resulting in a long-standing controversy.<sup>19-21</sup> It is worth noting that, parameters  
49  
50  
51 102 used to determine PD apparently varied across studies, and these studies also failed to  
52  
53  
54 103 adequately control for confounders, especially smoking, the most important confounder  
55  
56  
57 104 for the COPD-PD relationship. Therefore, to provide the latest and most convincing  
58  
59  
60 105 evidence, we systematically reviewed current available literature to investigate whether

1  
2  
3  
4  
5 106 PD increases the risk of COPD. The secondary objective was to evaluate the association  
6  
7 107 between PD and the risk of COPD-related events. Subgroup and stratified analyses were  
8  
9  
10 108 also conducted to adjust for the confounding by smoking.  
11  
12

13 109

## 15 110 **METHODS**

17  
18 111 This systematic review and meta-analysis was conducted and reported in accordance to  
19  
20 112 the Preferred Reporting Items for Systematic Reviews and Meta-Analyses (PRISMA)  
21  
22  
23 113 guideline.<sup>22</sup>  
24  
25

26 114

### 28 115 **Search strategy and selection criteria**

30  
31 116 We searched PubMed, EMBASE and CENTRAL for records evaluating association  
32  
33 117 between COPD and PD, from inception to 22 February 2023. The search strategy was  
34  
35  
36 118 described in online supplemental table S1. The language was restricted to English, for  
37  
38  
39 119 the purpose of rapid review.<sup>23</sup> Studies meeting the following criteria were included: (1)  
40  
41 120 adult participants ( $\geq 18$  years); (2) original studies with randomized controlled trial  
42  
43  
44 121 (RCT), cohort, case-control or cross-sectional study designs; (3) presenting clear  
45  
46  
47 122 diagnostic or assessment criteria for COPD and PD; (4) evaluating association between  
48  
49 123 PD and the risk of COPD, or risk of COPD-related events (AE and mortality), with  
50  
51  
52 124 statistical adjustment for smoking, and providing the adjusted odds ratio (OR), relative  
53  
54 125 risk (RR) or hazard ratio (HR) for the risk of COPD, AE and mortality in relation to PD.

56  
57 126 According to the inclusion criteria, two independent investigators (MY and XL)

1  
2  
3  
4  
5 127 performed systematical search, screened titles and abstracts of all retrieved studies to  
6  
7 128 exclude duplicate or irrelevant records. For articles requiring further assessment, full-  
8  
9  
10 129 text reviews were carried out and references of retrieved articles and relevant reviews  
11  
12  
13 130 were also manually checked to identify additional eligible studies. Disagreements were  
14  
15 131 resolved by discussion between the two reviewers or with the help of the third  
16  
17  
18 132 investigator (RP).

19  
20  
21 133

### 22 23 134 **Data extraction and quality assessment**

24  
25 135 Two investigators (MY and RP) independently extracted data from selected studies  
26  
27 136 using a standardized Excel (Microsoft Corporation) file. The following information was  
28  
29  
30 137 extracted: author, year of publication, country, study design, number of subjects (COPD  
31  
32  
33 138 and non-COPD), demographic characteristics of participants, periodontal variables  
34  
35  
36 139 applied to assess PD, diagnostic criteria for COPD, definition of COPD-related AE and  
37  
38  
39 140 mortality, adjusted OR, RR or HR for the risk of COPD, AE and mortality in relation to  
40  
41  
42 141 PD, as well as adjustment for confounders. The primary outcome was the risk of COPD.  
43  
44 142 Secondary outcome was the risk of COPD-related adverse events, including AE and  
45  
46  
47 143 mortality. Quality of studies was independently evaluated using the Newcastle-Ottawa  
48  
49 144 Scale<sup>24</sup> by two investigators (MY and XL). A score of  $\geq 6$  was considered a low risk  
50  
51  
52 145 while  $< 6$  a high risk of bias. Both case-control and cohort studies had a maximum score  
53  
54  
55 146 of 9. Cross-sectional study was regarded as case-control study when performing quality  
56  
57 147 assessment. Discrepancies regarding data extraction and quality assessment were  
58  
59  
60



1  
2  
3  
4  
5 148 resolved through discussion and consensus.  
6  
7

8 149

9  
10 150 **Data analysis**  
11

12  
13 151 The final pooled estimate was expressed as OR with 95% confident interval (CI).  
14

15 152 Considering CAL, ABL and PPD have been regarded as the primary parameters for  
16

17  
18 153 PD,<sup>25 26</sup> where more than one adjusted estimate was shown in the paper, we preferentially  
19

20  
21 154 used the estimate regarding these parameters (CAL > ABL > PPD), or the estimate being  
22

23 155 better adjusted for tobacco smoking (never smokers > adjusting for smoking intensity  
24

25  
26 156 [duration and dose] > adjusting for smoking status), or the estimate regarding more  
27

28 157 severe PD, where available. For case-control and cross-sectional studies, we estimated  
29

30  
31 158 the OR whereas for cohort studies we estimated the RR or HR. The random-effect model  
32

33 159 with inverse variance method were applied due to potential heterogeneity resulting from  
34

35  
36 160 methodological differences. Heterogeneity across studies was identified with the I<sup>2</sup>  
37

38  
39 161 statistic. I<sup>2</sup> statistic >50% indicated significant heterogeneity.  
40

41 162 To explore heterogeneity, subgroup analyses were conducted based on study design  
42

43  
44 163 (case-control, cross-sectional and cohort studies), geographical location (Asia, North  
45

46 164 America, Europe), assessment of PD (CAL, ABL and PPD), definition of COPD (Global  
47

48  
49 165 Initiative for Chronic Obstructive Lung Diseases, GOLD and non-GOLD criteria) and  
50

51  
52 166 adjustment for smoking intensity (dose and duration of smoking). To better control the  
53

54 167 confounding effect of smoking, stratified analyses were performed in smokers and never  
55

56  
57 168 smokers respectively.  
58  
59  
60

1  
2  
3  
4  
5 169 To test the robustness of study findings, we performed sensitivity analysis on studies  
6  
7  
8 170 with relatively large sample size ( $\geq 500$  participants), which tended to be more  
9  
10 171 representative of the general population and with smaller bias in the overall estimates in  
11  
12  
13 172 meta-analyses.<sup>27</sup> Additionally, influence of a single study on the overall pooled estimate  
14  
15 173 was tested by omitting one study in each turn. Publication bias was visually assessed  
16  
17  
18 174 using a funnel plot and quantitatively evaluated by the Egger's tests.  $P < 0.05$  was  
19  
20  
21 175 considered statistically significant. All statistical analyses were performed using Stata  
22  
23 176 version 16 (StataCorp) and Review manager version 5.4 (Cochrane Collaboration).  
24  
25  
26 177

## 28 178 **Patient and public involvement**

30 179 No patient involved.  
31  
32  
33  
34 180

## 36 181 **RESULTS**

### 38 182 **Study selection and characteristics**

40  
41 183 A total of 30165 records were identified from the initial database search. 13662 records  
42  
43 184 were removed for duplicates, and 16227 records were excluded after titles and abstracts  
44  
45 185 screening because of irrelevant content and animal studies. The remaining 276 full-text  
46  
47 186 articles were identified for eligibility, of which 254 were excluded for reasons including  
48  
49  
50 187 duplicates (six studies), reviews (183 studies), insufficient information (nine studies) and  
51  
52  
53 188 ineligible designs and outcomes (56 studies). Finally, 22 studies<sup>14-16 19-21 28-43</sup> were  
54  
55  
56 189 included in the review. The selection process is shown in **figure 1**.  
57  
58  
59  
60

1  
2  
3  
4  
5 190 The characteristics of included 22 studies were shown in **table 1**. The number of  
6  
7  
8 191 participants was 51704 and there were 9973 (18.9%) patients with COPD. The mean age  
9  
10 192 of patients with COPD was between 45.1 and 83.1 years while the control subjects was  
11  
12  
13 193 between 42.2 and 80.3 years. These studies were published between 1998 and 2021. The  
14  
15 194 sample size ranged from 120 to 13792. Nine studies were case-control studies<sup>15 19 28 29 32</sup>  
16  
17  
18 195 <sup>33 36 40 42</sup> and 10 studies were cross-sectional studies,<sup>14 20 30 31 34 35 38 39 41 43</sup> only three  
19  
20 196 studies with a cohort study design.<sup>16 21 37</sup> Additionally, 11 studies were conducted in  
21  
22  
23 197 Asia,<sup>15 16 19 32 34 35 37 38 40-42</sup> while six studies in the North America,<sup>14 20 21 28-30</sup> four studies  
24  
25  
26 198 in Europe<sup>31 33 36 39</sup> and one study in Africa.<sup>43</sup>

199

200

**Table 1** Characteristics of included studies

| Year / Study                                | Design          | Location      | No. COPD /<br>Control subjects | Age (COPD /<br>Control subjects) | Assessment of<br>PD | Assessment of<br>COPD |
|---------------------------------------------|-----------------|---------------|--------------------------------|----------------------------------|---------------------|-----------------------|
| 1998 Hayes <i>et al</i> <sup>28</sup>       | Case-control    | United States | 261/857                        | 45.1±9.7/42.2±9.1                | ABL                 | FEV <sub>1</sub>      |
| 1998 Scannapieco <i>et al</i> <sup>14</sup> | Cross-sectional | United States | 77/309                         | NA                               | OHI                 | Self-reported         |
| 2001 Garcia <i>et al</i> <sup>29</sup>      | Case-control    | United States | 279/833                        | NA                               | ABL, PPD            | FEV <sub>1</sub>      |
| 2001 Scannapieco <i>et al</i> <sup>30</sup> | Cross-sectional | United States | 810/12,982                     | 51.2±17.9/43.9±17.7              | CAL, GB             | Self-reported         |
| 2004 Hyman <i>et al</i> <sup>20</sup>       | Cross-sectional | United States | 993/6,632                      | 62.3±14.1/47.4±14.2              | CAL                 | GOLD                  |
| 2008 Leuckfeld <i>et al</i> <sup>31</sup>   | Cross-sectional | Norway        | 130/50                         | 54.9±4.9/47.0±9.8                | ABL                 | GOLD                  |
| 2009 Wang <i>et al</i> <sup>19</sup>        | Case-control    | China         | 306/328                        | 63.9±9.8/63.3±9.0                | CAL, PLI            | GOLD                  |
| 2012 Liu <i>et al</i> <sup>42</sup>         | Case-control    | China         | 183/209*                       | 64.3±10.1/63.6±9.7               | CAL, PPD, BI        | GOLD                  |

1  
2  
3  
4  
5  
6  
7  
8  
9  
10  
11  
12  
13  
14  
15  
16  
17  
18  
19  
20  
21  
22  
23  
24  
25  
26  
27  
28  
29  
30  
31  
32  
33  
34  
35  
36  
37  
38  
39  
40  
41  
42  
43  
44  
45  
46  
47  
48  
49  
50  
51  
52  
53  
54  
55  
56  
57  
58  
59  
60

|                                                 |                 |               |                        |                    |                           |                        |
|-------------------------------------------------|-----------------|---------------|------------------------|--------------------|---------------------------|------------------------|
| 2012 Si <i>et al</i> <sup>15</sup>              | Case-control    | China         | 581/438                | 63.9±9.4/62.8±9.5  | CAL, ABL, PPD,<br>PLI, BI | GOLD                   |
| 2012 Zhou <i>et al</i> <sup>32</sup>            | Case-control    | China         | 193/181                | 63.6±0.3/62.1±9.1  | CAL, ABL, PPD,<br>PLI, BI | GOLD                   |
| 2013 Barros <i>et al</i> <sup>21</sup>          | Cohort          | United States | 399/1,236 <sup>§</sup> | 63.9±5.7/66.0±5.1  | CAL, PPD                  | GOLD                   |
| 2013 Ledić <i>et al</i> <sup>33</sup>           | Case-control    | Croatia       | 93/43                  | 65.8±9.7/62.1±11.9 | CAL                       | GOLD                   |
| 2016 Chung <i>et al</i> <sup>34</sup>           | Cross-sectional | Korea         | 697/5,181              | 64.3±0.2/54.6±0.1  | PPD, GB                   | GOLD                   |
| 2018 AbdelHalim <i>et al</i> <sup>43</sup>      | Cross-sectional | Egypt         | 134/116*               | 56.8±10.4/55.3±9.1 | CAL, PPD, BI,<br>PLI, OHI | GOLD                   |
| 2018 Harland <i>et al</i> <sup>35</sup>         | Cross-sectional | Japan         | 149/1,325              | 61.3±9.1/54.5±8.7  | PPD                       | GOLD                   |
| 2018 Lopez-de-Andrés <i>et al</i> <sup>36</sup> | Case-control    | Spain         | 2,699/2,699            | 63±14/61±14        | Self-reported             | Self-reported          |
| 2019 Takeuchi <i>et al</i> <sup>37</sup>        | Cohort          | Japan         | 22/878                 | NA                 | CAL, PPD                  | GOLD                   |
| 2020 Jung <i>et al</i> <sup>38</sup>            | Cross-sectional | Korea         | 1,134/6,585            | 62.6±0.4/53.6±0.2  | PPD                       | FEV <sub>1</sub> / FVC |
| 2020 Qian <i>et al</i> <sup>16</sup>            | Cohort          | China         | 23 <sup>‡</sup> /NA    | 83.1±4.8/80.3±3.7  | ABL                       | NR                     |
| 2020 Winning <i>et al</i> <sup>39</sup>         | Cross-sectional | Sweden        | 86/740                 | NA                 | ABL                       | GOLD                   |
| 2020 Zhou <i>et al</i> <sup>40</sup>            | Case-control    | China         | 60/60                  | 63.1±10.1/60.0±9.4 | CAL, PLI                  | GOLD                   |
| 2021 Kataoka <i>et al</i> <sup>41</sup>         | Cross-sectional | Japan         | 464/249                | 54.1±9.4/NA        | PPD                       | GOLD                   |

- 201 Continuous data are presented as mean ± standard deviation (SD) unless otherwise indicated.
- 202 \*No. COPD subjects with frequent exacerbation (≥2 exacerbations in the last year)/Infrequent exacerbation (< 2
- 203 exacerbations in the last year).
- 204 <sup>§</sup>No. COPD subjects with events (hospitalization for exacerbation or COPD-related death) in the 5-year follow-up
- 205 visit/COPD subjects without events in the 5-year follow-up visit.
- 206 <sup>‡</sup>No. COPD-related mortality in a follow-up visit more than 5 years.
- 207 ABL, alveolar bone loss; BI, bleeding index; CAL, clinical attachment level; FEV<sub>1</sub>, forced expiratory volume in 1
- 208 second; FVC, forced vital capacity; GB, gingival bleeding; GOLD, Global Initiative for Chronic Obstructive Lung

1  
2  
3  
4 209 Disease; NA, not available; OHI, oral health index; PD, periodontal disease; PLI, plaque index; PPD, probing pocket  
5 210 depth.  
6  
7 211

8  
9 212 All included articles performed multivariable analyses, in which the risk of COPD, or  
10  
11 213 risk of COPD-related events (AE or mortality), was identified as the dependent variable  
12  
13  
14 214 and PD as the independent variable. Controlling for confounding by smoking included  
15  
16 215 stratification (smokers and never smokers) or covariance adjustment in multivariable  
17  
18 216 models (the degree of control: never smokers > adjusting for smoking intensity [duration  
19  
20 217 and dose] > adjusting for smoking status).  
21  
22  
23

24 218 The adjustment for confounders of included studies was detailedly presented in online  
25  
26 219 supplemental table S2. 16 articles reported the adjusted ORs and 4 reported adjusted RRs,  
27  
28 220 two studies reporting HRs. Definition of COPD comprised the GOLD criteria,<sup>2</sup> FEV<sub>1</sub>  
29  
30 221 <65% of predicted volume, having a history of chronic bronchitis and / or emphysema,  
31  
32 222 self-reported and others. Periodontal parameters used for PD assessment were CAL,  
33  
34 223 ABL, PPD, gingival bleeding (GB), bleeding index (BI), plaque index (PLI) and oral  
35  
36 224 health index (OHI).  
37  
38  
39  
40  
41  
42  
43  
44

#### 45 226 **Assessment of bias**

46  
47 227 Based on the Newcastle-Ottawa Scale, quality assessment for the 22 studies was shown  
48  
49 228 in online supplemental table S3. Among them, 18 studies<sup>15 19-21 28-30 32-42</sup> were rated as  
50  
51 229 high quality with a total score of  $\geq 6$  whereas four studies<sup>14 16 31 43</sup> as a score of <6,  
52  
53 230 indicating a high risk of bias. The main reasons for lower scores were selection bias  
54  
55  
56 231 (representativeness of sample population), especially for control groups and  
57  
58  
59  
60

232 comparability of cases and control subjects.

233

### 234 **Primary outcome**

235 18 studies<sup>14 15 19 20 28-41</sup> provided data for the risk of COPD in relation to PD. Quantitative  
236 analysis demonstrated that after adjusting for smoking status, PD increased the risk of  
237 COPD, but only by a ratio of 1.20 (95% CI 1.09 to 1.32,  $p=0.0002$ ,  $I^2=79\%$ ) (**figure 2**).

238 Further exclusion of any single study did not materially alter the overall pooled OR, with  
239 a range from 1.17 (95% CI 1.06-1.28) to 1.28 (95% CI 1.12-1.46). Sensitivity analysis  
240 limited to studies with larger sample size ( $\geq 500$ )<sup>15 19 20 28-30 34-39 41</sup> revealed similar results  
241 (OR 1.24, 95% CI 1.08 to 1.43,  $p=0.003$ ,  $I^2=82\%$ ) (online supplemental figure S1).

242 However, significant publication bias was noted by visual inspections of the funnel plot  
243 (online supplemental figure S2) and the Egger's test for small study effects (bias  
244 coefficient 1.49, 95% CI 0.44 to 2.55,  $p=0.008$ ).

245 Subgroup analyses indicated that assessment parameters of PD ( $p=0.02$ ), study design  
246 ( $p=0.05$ ) and diagnosis of COPD ( $p=0.05$ ) were the potential main causes of  
247 heterogeneity (**table 2**). Moreover, there were several findings in subgroup analyses.

248 First, after further controlling for smoking intensity, PD did not increase the risk of  
249 COPD (OR 1.14, 95% CI 0.86 to 1.51,  $p=0.38$ , 10 studies<sup>15 19 20 29-33 35 37</sup>), similar to the  
250 subgroup applying a GOLD criterion (OR 1.10, 95% CI 1.00 to 1.22,  $p=0.06$ , 12  
251 studies<sup>15 19 20 31-35 37 39-41</sup>). Second, among the parameters of CAL, ABL and PPD, only  
252 subgroup using the parameter of ABL showed a significant association between PD and

253 the risk of COPD (OR 1.98, 95% CI 1.32 to 2.97,  $p=0.001$ , six studies<sup>15 28 29 31 32 39</sup>).

254 Third, in the three geographical locations (Asia, North America and Europe), only the

255 subgroup of Europe indicated that PD increased the risk of COPD (OR 2.05, 95% CI

256 1.07 to 3.95,  $p=0.03$ , four studies<sup>31 33 36 39</sup>).

257

258 **Table 2** Subgroup analyses regarding the risk of COPD

| Subgroups                                   | No. Studies | No. Participants<br>/Cases | OR value<br>(95% CI) | P<br>value    | I <sup>2</sup> , % |
|---------------------------------------------|-------------|----------------------------|----------------------|---------------|--------------------|
| Adjusted for smoking intensity <sup>a</sup> |             |                            |                      |               |                    |
| Yes                                         | 10          | 27,246 / 3,556             | 1.14 (0.86-1.51)     | 0.38          | 67                 |
| No                                          | 8           | 22,158 / 5,478             | 1.29 (1.13-1.48)     | <b>0.0002</b> | 75                 |
| Assessment of PD                            |             |                            |                      |               |                    |
| CAL                                         | 8           | 24,600 / 3,058             | 1.04 (0.96-1.14)     | 0.33          | 75                 |
| ABL                                         | 6           | 4,629 / 1,530              | 1.98 (1.32-2.97)     | <b>0.001</b>  | 56                 |
| PPD                                         | 8           | 19,189 / 3,519             | 1.16 (0.89-1.51)     | 0.27          | 63                 |
| Geographical location                       |             |                            |                      |               |                    |
| Asia                                        | 9           | 18,831 / 3,606             | 1.07 (0.99-1.17)     | 0.08          | 65                 |
| North America                               | 5           | 24,033 / 2,420             | 1.37 (0.93-2.01)     | 0.11          | 63                 |
| Europe                                      | 4           | 6,540 / 3,008              | 2.05 (1.07-3.95)     | <b>0.03</b>   | 71                 |
| Assessment of COPD                          |             |                            |                      |               |                    |
| GOLD                                        | 12          | 19,879 / 3,774             | 1.10 (1.00-1.22)     | 0.06          | 71                 |

|                 |   |                |                   |               |    |
|-----------------|---|----------------|-------------------|---------------|----|
| Non-GOLD        | 6 | 29,525 / 5,260 | 1.35 (1.14-1.61)  | <b>0.0007</b> | 46 |
| Study design    |   |                |                   |               |    |
| Case-control    | 8 | 9,911 / 4,472  | 1.12 (1.01-1.24)  | <b>0.03</b>   | 86 |
| Cross-sectional | 9 | 38,593 / 4,540 | 1.34 (1.08-1.66)  | <b>0.007</b>  | 45 |
| Cohort          | 1 | 878 / 22       | 3.51 (1.15-10.74) | <b>0.03</b>   | -  |

259 <sup>a</sup>Duration and dose of smoking.

260 ABL, alveolar bone loss; CAL, clinical attachment level; CI, confident interval; GOLD, Global  
 261 Initiative for Chronic Obstructive Lung Disease; OR, odds ratio; PD, periodontal disease; PPD,  
 262 probing pocket depth.

263 **Bold:** subgroups with positive results.

264

265 Stratified analyses regarding smoking status revealed that PD did not increase the risk  
 266 of COPD whether in smokers (OR 1.46, 95% CI 0.92 to 2.31, p=0.11, seven studies<sup>15 19</sup>  
 267 <sup>20 29 31 32 35</sup>) or never smokers (OR 0.93, 95% CI 0.72 to 1.21, p=0.58, six studies<sup>15 19 20 29</sup>  
 268 <sup>32 35</sup>) (**figure 3**).

269

## 270 Secondary outcome

271 Only four studies evaluated the risk of COPD-related AE or mortality.<sup>16 21 42 43</sup> Definition  
 272 of AE was acute deterioration in clinical presentations according to the recommendation  
 273 in GOLD guideline.<sup>21 42 43</sup> Pooled analysis showed that after adjusting for smoking status,  
 274 PD did not increase the risk of COPD-related AE or mortality (OR 1.18, 95% CI 0.71 to  
 275 1.97, p=0.52, I<sup>2</sup>=36%) (**figure 4**).

276

## 277 DISCUSSION



1  
2  
3  
4  
5 278 This systematic review and meta-analysis identified 22 observational studies to  
6  
7  
8 279 investigate the association between COPD and PD. The results indicated that, after  
9  
10 280 strictly adjusting for confounding by smoking, PD did not increase the risk of COPD, as  
11  
12  
13 281 well as the risk of COPD-related AE or mortality. Moreover, these findings were  
14  
15 282 consistent across the subgroup and stratified analyses.

16  
17  
18 283 To the best of our knowledge, this is the first and largest meta-analysis investigating  
19  
20 284 the association of PD with the risk of COPD and its clinical events, with adequately  
21  
22  
23 285 controlling the confounding effect of smoking. Besides, nearly all included articles were  
24  
25 286 adjusted for age, except the study by Scannapieco *et al.*<sup>14</sup> Prior publications have  
26  
27  
28 287 suggested that PD significantly increased the risk of COPD and COPD-related events.  
29  
30  
31 288 However, the majority of studies have non-negligible flaws, such as only performing  
32  
33  
34 289 univariate analyses, not controlling the confounding by smoking, and using parameters  
35  
36 290 with relatively low specificity for determining PD.<sup>13 25 43</sup> In the present study, to define  
37  
38  
39 291 PD as accurately as possible, we preferentially extracted data concerning the parameters  
40  
41 292 of CAL, ABL and PPD rather than PLI, OHI or remaining teeth. CAL, ABL and PPD  
42  
43  
44 293 are clinical measurements reflecting the destruction of periodontal tissues and  
45  
46 294 momentous parameters for diagnosis of PD.<sup>25 44</sup> Meanwhile, compared with previous  
47  
48  
49 295 meta-analyses, we enrolled more studies, applied more rigorous screening criteria and  
50  
51  
52 296 most importantly, revealed opposite results. In the meta-analyses with incomplete  
53  
54 297 adjustment for smoking, OR value for the risk of COPD ranged from 1.28 to 2.08.<sup>45-48</sup>  
55  
56  
57 298 However, our findings were similar to studies conducted in never smokers,<sup>15 19 20 29 32 35</sup>

1  
2  
3  
4  
5 299 which showed that PD conferred no risk for COPD. Additionally, pooled analyses  
6  
7  
8 300 regarding parameters of CAL, ABL and PPD revealed that PD also did not increase the  
9  
10 301 risk of COPD-related AE or mortality. These findings demonstrate that previously  
11  
12 302 reported correlation between PD and COPD may be results of flawed study design,  
13  
14  
15 303 confounding by smoking and even other factors, such as age and living condition.  
16  
17

18 304 As a momentous inducer for inflammation-related pathological processes, tobacco is  
19  
20 305 known to correlate with a variety of systemic disorders.<sup>49</sup> It is also one of the foremost  
21  
22 306 risk factors for both COPD and PD.<sup>5 10</sup> From the epidemiological perspective, tobacco  
23  
24 307 smoking is a confounder with spuriously inflated effect on the relationship between PD  
25  
26 308 and systemic diseases.<sup>49</sup> To investigate the true association between PD and COPD, it is  
27  
28 309 of great importance to rigorously control the confounding effect of smoking, which  
29  
30 310 means initiating research in never smokers. However, the majority of former studies  
31  
32 311 failed to do that. After a wide search, only six studies focusing on never smokers were  
33  
34 312 found, which unanimously indicated PD was not related with the risk of COPD. We also  
35  
36 313 observed a decreased intensity of the association between both diseases with the increase  
37  
38 314 of control for smoking. Therefore, it could be too early to make a certain conclusion on  
39  
40 315 the COPD-PD relationship. Although interventional studies revealed that periodontal  
41  
42 316 treatment reduced the risk of AE, a number of problems existed, including small sample  
43  
44 317 size, limited study quality and unclear history of smoking or medication during the  
45  
46 318 follow-up.<sup>17 18</sup> For example, compared with control subjects, patients in treatment groups  
47  
48  
49  
50  
51  
52  
53  
54  
55  
56  
57 319 may reduce smoking intentionally, which could spuriously enhance the positive effect  
58  
59  
60

1  
2  
3  
4  
5 320 of periodontal treatment. Consequently, future researches need to take these problems  
6  
7  
8 321 into account.

9  
10 322 It is worth noting that, another possibility that smoking acts as an effect modifier in  
11  
12  
13 323 the COPD-PD relationship should not be ignored. Two observational studies performing  
14  
15 324 stratified analyses concerning smoking status found that the strong correlation of PD  
16  
17  
18 325 with the risk of COPD was restricted to smokers.<sup>15 20</sup> However, this was not revealed in  
19  
20  
21 326 the present study, thus more investigations in smokers and never smokers respectively  
22  
23 327 are required.

24  
25  
26 328 Besides, current evidence has demonstrated several issues to be addressed in future  
27  
28  
29 329 study, comprising inconsistent diagnostic criteria of COPD and PD, the lack of  
30  
31  
32 330 prospective study design and differing adjustments for covariates. These contribute to  
33  
34 331 substantial heterogeneity among studies.<sup>45 46</sup> The present study indicated the  
35  
36  
37 332 heterogeneity was partly explained by study design, diagnostic criteria of COPD and  
38  
39  
40 333 periodontal indexes used to assess PD. Significant association concerning PD and risk  
41  
42  
43 334 of COPD was only identified in subgroups lacking well designs, applying non-GOLD  
44  
45 335 criteria or utilizing ABL as the measure of PD. For one thing, this demonstrated that, as  
46  
47  
48 336 sources of bias, observational study design and nonstandard diagnostic method for  
49  
50  
51 337 COPD could induce apparent deviations, confusing the true relationship between COPD  
52  
53  
54 338 and PD. For another, given undetermined diagnostic criteria for PD, discrepancies  
55  
56  
57 339 between ABL and other indexes cannot fully support the COPD-PD association. Notably,  
58  
59  
60 340 as a radiographic measure, although ABL has been widely considered to reflect

1  
2  
3  
4  
5 341 cumulative effects of periodontal attachment loss over time by chronic inflammation,<sup>28</sup>  
6  
7  
8 342 it does not only exist in PD. Non-periodontal diseases such as liver disorders, cancer and  
9  
10 343 osteoporosis<sup>50</sup> could also result in ABL. As mentioned previously,<sup>28</sup> the observed  
11  
12  
13 344 correlation between ABL and risk of COPD may relate to those non-periodontal diseases.  
14  
15  
16 345

### 17 18 346 **Limitations**

19  
20 347 Several potential limitations should be taken into consideration when interpreting the  
21  
22  
23 348 present results. First, all included studies are observational, which are highly subject to  
24  
25  
26 349 selection bias and confounding by indication. Second, substantial heterogeneity was  
27  
28  
29 350 identified in current study, though we conducted subgroup and stratified analyses to  
30  
31 351 partly explain and reduce it. As stated above, several problems leading to heterogeneity  
32  
33  
34 352 need to be addressed in future researches. Third, the number of studies on risk of COPD-  
35  
36 353 related events was limited, thus the result needs to be carefully understood. Limited  
37  
38  
39 354 number of studies in subgroup and stratified analyses suggested more relevant studies  
40  
41 355 with larger sample size are required. Fourth, although confounding effects of age and  
42  
43  
44 356 smoking were controlled by stratified analysis and statistical adjustment, other potential  
45  
46  
47 357 confounders such as gender, living condition and socioeconomic status<sup>10</sup> could also  
48  
49 358 reduce reliability of the results. Fifth, obvious publication bias was noted in relevant  
50  
51  
52 359 meta-analyses,<sup>45 46</sup> including the present study. For the purpose of rapid review,<sup>23</sup> we  
53  
54  
55 360 only included articles in English. There could exist non-English publications and  
56  
57 361 unpublished evidence, although we searched English-language studies as much as  
58  
59  
60

1  
2  
3  
4  
5 362 possible. Finally, although smoking status and intensity were considered in subgroup  
6  
7 363 analysis, information regarding tobacco content and chemical composition were not  
8  
9 364 collected. This information is difficult to obtain, especially from self-reported smoking,  
10  
11  
12 365 leaving a residual smoking-related bias. Consequently, it is advisable to explore  
13  
14  
15 366 relationship between COPD and PD in never smokers.  
16  
17  
18 367

## 368 **CONCLUSION**

369 In summary, this systematic review and meta-analysis suggests that PD is not associated  
370 with the risk of COPD and COPD-related events after strict adjustment for smoking,  
371 although the positive relationship between COPD and PD was previously reported.  
372 Large-scale prospective cohort studies with control of potential confounding factors are  
373 warranted to validate the present findings.  
374

## 375 **Abbreviations**

376 ABL: Alveolar bone loss; AE: Acute exacerbation; BI: Bleeding index; CAL: Clinical  
377 attachment level; CI: Confident interval; COPD: Chronic obstructive pulmonary disease;  
378 GB: Gingival bleeding; GOLD: Global Initiative for Chronic Obstructive Lung Diseases;  
379 HR: Hazard ratio; OHI: Oral health index; OR: Odds ratio; PD: Periodontal disease; PLI:  
380 Plaque index; PPD: Probing pocket depth; RR: Relative risk.  
381

382 **Contributors** LC and LL designed the study. MY and XL screened and selected relevant

1  
2  
3  
4  
5 383 studies. MY, RP and XL rated the study quality and extracted the data. MY, RP, XL and  
6  
7  
8 384 JP analyzed the data. All authors interpreted the data, and MY, RP, XL, JP drafted the  
9  
10 385 paper. LC and LL critically revised the paper. All authors acknowledged and agreed with  
11  
12  
13 386 the format and content of the paper before submission for publication. LC and LL are  
14  
15 387 the guarantors and responsible for the overall contents of this study.  
16  
17

18 388

19  
20 389 **Funding** This study was supported in part by grant 2016YFC0901100 from the National  
21  
22  
23 390 Key Research and Development Program of China.  
24  
25

26 391

27  
28 392 **Competing interests** None declared.  
29  
30

31 393

32  
33 394 **Patient and public involvement** Patients and/or the public were not involved in the  
34  
35  
36 395 design, or conduct, or reporting, or dissemination plans of this research.  
37  
38

39 396

40  
41 397 **Patient consent for publication** Not applicable.  
42  
43

44 398

45  
46 399 **Ethics approval** Not applicable.  
47  
48

49 400

50  
51 401 **Data availability statement** All data relevant to the study are included in the article or  
52  
53  
54 402 uploaded as supplementary information.  
55  
56

57 403  
58  
59  
60

404 **ORCID iD**405 Lei Chen <https://orcid.org/0000-0003-3476-0035>

406

407 **REFERENCES**

- 408 1. World Health Organization. The top 10 causes of death, 2020. Available:  
 409 <https://www.who.int/news-room/fact-sheets/detail/the-top-10-causes-of-death> (accessed 25  
 410 February 2023).
- 411 2. Global Initiative for Chronic Obstructive Lung Disease. Global strategy for the diagnosis,  
 412 management and prevention of chronic obstructive pulmonary disease (2023 report).  
 413 Available: <https://goldcopd.org/2023-gold-report-2/> (accessed 25 February 2023).
- 414 3. Negewo NA, Gibson PG, McDonald VM. COPD and its comorbidities: Impact,  
 415 measurement and mechanisms. *Respirology* 2015;20:1160-1171.
- 416 4. Tan L, Tang X, Pan C, *et al.* Relationship among clinical periodontal, microbiologic  
 417 parameters and lung function in participants with chronic obstructive pulmonary disease. *J*  
 418 *Periodontol* 2019;90:134-140.
- 419 5. Pihlstrom BL, Michalowicz BS, Johnson NW. Periodontal diseases. *Lancet*  
 420 2005;366:1809-1820.
- 421 6. Kassebaum NJ, Bernabé E, Dahiya M, *et al.* Global burden of severe periodontitis in 1990-  
 422 2010: a systematic review and meta-regression. *J Dent Res* 2014;93:1045-1053.
- 423 7. Sczepanik FSC, Grossi ML, Casati M, *et al.* Periodontitis is an inflammatory disease of  
 424 oxidative stress: We should treat it that way. *Periodontol 2000* 2020;84:45-68.
- 425 8. Usher AK, Stockley RA. The link between chronic periodontitis and COPD: a common  
 426 role for the neutrophil? *BMC Med* 2013;11:241.
- 427 9. Dong J, Li W, Wang Q, *et al.* Relationships Between Oral Microecosystem and  
 428 Respiratory Diseases. *Front Mol Biosci* 2021;8:718222.
- 429 10. Genco RJ, Borgnakke WS. Risk factors for periodontal disease. *Periodontol 2000*  
 430 2013;62:59-94.
- 431 11. Sapey E, Yonel Z, Edgar R, *et al.* The clinical and inflammatory relationships between  
 432 periodontitis and chronic obstructive pulmonary disease. *J Clin Periodontol* 2020;47:1040-  
 433 1052.
- 434 12. Scannapieco FA. Role of oral bacteria in respiratory infection. *J Periodontol* 1999;70:793-  
 435 802.
- 436 13. Kelly N, Winning L, Irwin C, *et al.* Periodontal status and chronic obstructive pulmonary  
 437 disease (COPD) exacerbations: a systematic review. *BMC Oral Health* 2021;21:425.
- 438 14. Scannapieco FA, Papandonatos GD, Dunford RG. Associations between oral conditions  
 439 and respiratory disease in a national sample survey population. *Ann Periodontol*  
 440 1998;3:251-256.
- 441 15. Si Y, Fan H, Song Y, *et al.* Association between periodontitis and chronic obstructive  
 442 pulmonary disease in a Chinese population. *J Periodontol* 2012;83:1288-1296.

- 1  
2  
3  
4 443 16. Qian Y, Yuan W, Mei N, *et al.* Periodontitis increases the risk of respiratory disease  
5 444 mortality in older patients. *Exp Gerontol* 2020;133:110878.
- 7 445 17. Zhou X, Han J, Liu Z, *et al.* Effects of periodontal treatment on lung function and  
8 446 exacerbation frequency in patients with chronic obstructive pulmonary disease and chronic  
9 447 periodontitis: a 2-year pilot randomized controlled trial. *J Clin Periodontol* 2014;41:564-  
11 448 572.
- 12 449 18. Kucukcoskun M, Baser U, Oztekin G, *et al.* Initial periodontal treatment for prevention of  
13 450 chronic obstructive pulmonary disease exacerbations. *J Periodontol* 2013;84:863-870.
- 15 451 19. Wang Z, Zhou X, Zhang J, *et al.* Periodontal health, oral health behaviours, and chronic  
16 452 obstructive pulmonary disease. *J Clin Periodontol* 2009;36:750-755.
- 17 453 20. Hyman JJ, Reid BC. Cigarette smoking, periodontal disease: and chronic obstructive  
18 454 pulmonary disease. *J Periodontol* 2004;75:9-15.
- 20 455 21. Barros SP, Suruki R, Loewy ZG, *et al.* A cohort study of the impact of tooth loss and  
21 456 periodontal disease on respiratory events among COPD subjects: modulatory role of  
22 457 systemic biomarkers of inflammation. *PLoS One* 2013;8:e68592.
- 24 458 22. Moher D, Shamseer L, Clarke M, *et al.* Preferred reporting items for systematic review and  
25 459 meta-analysis protocols (PRISMA-P) 2015 statement. *Syst Rev* 2015;4:1.
- 26 460 23. Nussbaumer-Streit B, Klerings I, Dobrescu AI, *et al.* Excluding non-English publications  
27 461 from evidence-syntheses did not change conclusions: a meta-epidemiological study. *J Clin*  
28 462 *Epidemiol* 2020;118:42-54.
- 30 463 24. Wells G, Shea B, O'Connell D, *et al.* The Newcastle-Ottawa Scale (NOS) for assessing the  
31 464 quality of nonrandomised studies in meta-analyses, 2021. Available:  
33 465 [http://www.ohri.ca/programs/clinical\\_epidemiology/oxford.asp](http://www.ohri.ca/programs/clinical_epidemiology/oxford.asp) (accessed 25 February  
34 466 2023).
- 35 467 25. Kinane DF, Stathopoulou PG, Papapanou PN. Periodontal diseases. *Nat Rev Dis Primers*  
36 468 2017;3:17038.
- 38 469 26. Farook FF, Alodwene H, Alharbi R, *et al.* Reliability assessment between clinical  
39 470 attachment loss and alveolar bone level in dental radiographs. *Clin Exp Dent Res*  
40 471 2020;6:596-601.
- 42 472 27. Lin L. Bias caused by sampling error in meta-analysis with small sample sizes. *PLoS One*  
43 473 2018;13:e0204056.
- 44 474 28. Hayes C, Sparrow D, Cohen M, *et al.* The association between alveolar bone loss and  
45 475 pulmonary function: the VA Dental Longitudinal Study. *Ann Periodontol* 1998;3:257-261.
- 47 476 29. Garcia RI, Nunn ME, Vokonas PS. Epidemiologic associations between periodontal  
48 477 disease and chronic obstructive pulmonary disease. *Ann Periodontol* 2001;6:71-77.
- 50 478 30. Scannapieco FA, Ho AW. Potential associations between chronic respiratory disease and  
51 479 periodontal disease: analysis of National Health and Nutrition Examination Survey III. *J*  
52 480 *Periodontol* 2001;72:50-56.
- 54 481 31. Leuckfeld I, Obregon-Whittle MV, Lund MB, *et al.* Severe chronic obstructive pulmonary  
55 482 disease: association with marginal bone loss in periodontitis. *Respir Med* 2008;102:488-  
56 483 494.
- 57 484 32. Zhou X, Han J, Song Y, *et al.* Serum levels of 25-hydroxyvitamin D, oral health and  
58 485 chronic obstructive pulmonary disease. *J Clin Periodontol* 2012;39:350-356.



- 1  
2  
3  
4 486 33. Ledić K, Marinković S, Puhar I, *et al.* Periodontal disease increases risk for chronic  
5 487 obstructive pulmonary disease. *Coll Antropol* 2013;37:937-942.
- 7 488 34. Chung JH, Hwang HJ, Kim SH, *et al.* Associations Between Periodontitis and Chronic  
8 489 Obstructive Pulmonary Disease: The 2010 to 2012 Korean National Health and Nutrition  
9 490 Examination Survey. *J Periodontol* 2016;87:864-871.
- 11 491 35. Harland J, Furuta M, Takeuchi K, *et al.* Periodontitis modifies the association between  
12 492 smoking and chronic obstructive pulmonary disease in Japanese men. *J Oral Sci*  
13 493 2018;60:226-231.
- 15 494 36. Lopez-de-Andrés A, Vazquez-Vazquez L, Martinez-Huedo MA, *et al.* Is COPD associated  
16 495 with periodontal disease? A population-based study in Spain. *Int J Chron Obstruct Pulmon*  
17 496 *Dis* 2018;13:3435-3445.
- 19 497 37. Takeuchi K, Matsumoto K, Furuta M, *et al.* Periodontitis Is Associated with Chronic  
20 498 Obstructive Pulmonary Disease. *J Dent Res* 2019;98:534-540.
- 22 499 38. Jung ES, Lee KH, Choi YY. Association between oral health status and chronic obstructive  
23 500 pulmonary disease in Korean adults. *Int Dent J* 2020;70:208-213.
- 24 501 39. Winning L, Polyzois I, Sanmartin Berglund J, *et al.* Periodontitis and airflow limitation in  
25 502 older Swedish individuals. *J Clin Periodontol* 2020;47:715-725.
- 27 503 40. Zhou X, Wang J, Liu W, *et al.* Periodontal Status and Microbiologic Pathogens in Patients  
28 504 with Chronic Obstructive Pulmonary Disease and Periodontitis: A Case-Control Study. *Int*  
29 505 *J Chron Obstruct Pulmon Dis* 2020;15:2071-2079.
- 31 506 41. Kataoka S, Kimura M, Yamaguchi T, *et al.* A cross-sectional study of relationships  
32 507 between periodontal disease and general health: The Hitachi Oral Healthcare Survey. *BMC*  
33 508 *Oral Health* 2021;21:644.
- 35 509 42. Liu Z, Zhang W, Zhang J, *et al.* Oral hygiene, periodontal health and chronic obstructive  
36 510 pulmonary disease exacerbations. *J Clin Periodontol* 2012;39:45-52.
- 38 511 43. Abdelhalim H, Aboelnaga H, Aggour R. Chronic obstructive pulmonary disease  
39 512 exacerbations and periodontitis: a possible association. *Egyptian Journal of Bronchology*  
40 513 2018;12.
- 42 514 44. Papapanou PN, Sanz M, Buduneli N, *et al.* Periodontitis: Consensus report of workgroup 2  
43 515 of the 2017 World Workshop on the Classification of Periodontal and Peri-Implant  
44 516 Diseases and Conditions. *J Clin Periodontol* 2018;45 Suppl 20:S162-s170.
- 46 517 45. Zeng XT, Tu ML, Liu DY, *et al.* Periodontal disease and risk of chronic obstructive  
47 518 pulmonary disease: a meta-analysis of observational studies. *PLoS One* 2012;7:e46508.
- 49 519 46. Gomes-Filho IS, Cruz SSD, Trindade SC, *et al.* Periodontitis and respiratory diseases: A  
50 520 systematic review with meta-analysis. *Oral Dis* 2020;26:439-446.
- 52 521 47. Wu Z, Xiao C, Chen F, *et al.* Pulmonary disease and periodontal health: a meta-analysis.  
53 522 *Sleep Breath* 2022.
- 55 523 48. Molina A, Huck O, Herrera D, *et al.* The association between respiratory diseases and  
54 524 periodontitis: A systematic review and meta-analysis. *J Clin Periodontol* 2023.
- 56 525 49. Hujjoel PP, Drangsholt M, Spiekerman C, *et al.* Periodontitis-systemic disease associations  
57 526 in the presence of smoking--causal or coincidental? *Periodontol 2000* 2002;30:51-60.
- 59 527 50. Intini G, Katsuragi Y, Kirkwood KL, *et al.* Alveolar bone loss: mechanisms, potential  
60 528 therapeutic targets, and interventions. *Adv Dent Res* 2014;26:38-46.

1  
2  
3  
4  
5 529  
6  
7  
8 530  
9  
10 531  
11  
12  
13 532  
14  
15 533  
16  
17  
18 534  
19  
20  
21 535  
22  
23 536  
24  
25  
26 537  
27  
28 538  
29  
30  
31 539  
32  
33 540  
34  
35  
36 541  
37  
38  
39 542  
40  
41 543  
42  
43  
44 544  
45  
46  
47 545  
48  
49 546  
50  
51  
52 547  
53

54 **Figure legends**

55  
56  
57 **Figure 1** PRISMA flow diagram of study selection.  
58  
59  
60

1  
2  
3  
4  
5 550 **Figure 2** Forest plot of the risk of COPD by periodontal disease, subgroup analysis based  
6  
7  
8 551 on adjusted by smoking status and intensity versus by smoking status only. Values more  
9  
10 552 than one indicate a higher risk in patients with periodontal disease.

11  
12  
13 553 **Figure 3** Forest plot of the risk of COPD by periodontal disease. **A** in smokers and **B** in  
14  
15 554 never smokers. Values more than one indicate a higher risk in patients with periodontal  
16  
17  
18 555 disease.

19  
20  
21 556 **Figure 4** Forest plot of the risk of COPD-related events by periodontal disease. Values  
22  
23 557 more than one indicate a higher risk in patients with periodontal disease.  
24  
25  
26  
27  
28  
29  
30  
31  
32  
33  
34  
35  
36  
37  
38  
39  
40  
41  
42  
43  
44  
45  
46  
47  
48  
49  
50  
51  
52  
53  
54  
55  
56  
57  
58  
59  
60

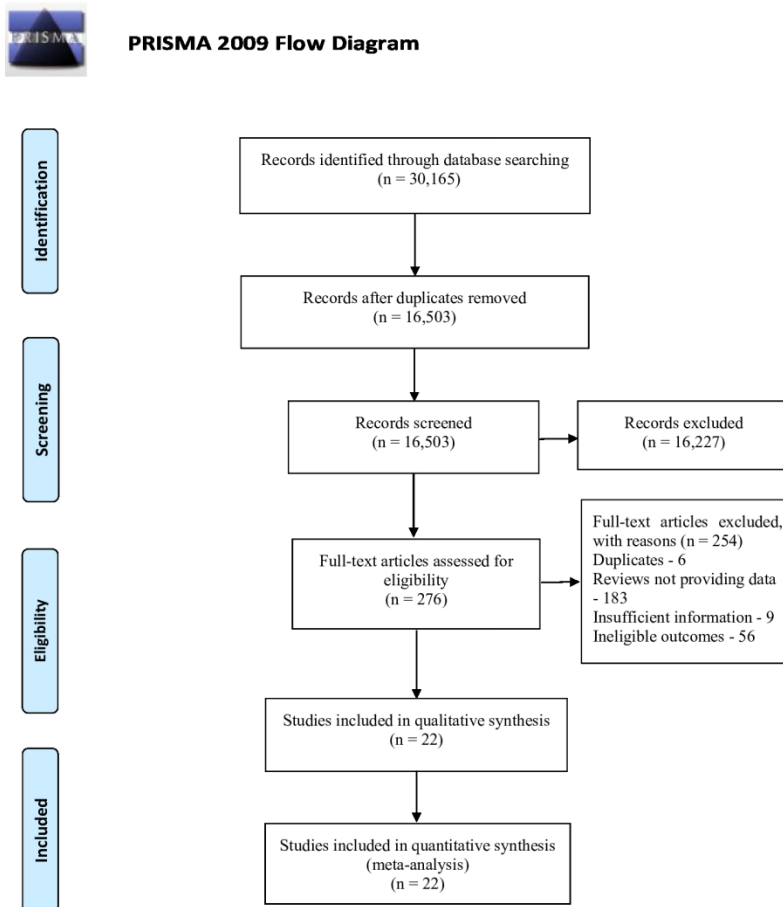

Figure 1 PRISMA flow diagram of study selection.

215x279mm (200 x 200 DPI)



Figure 2 Forest plot of the risk of COPD by periodontal disease, subgroup analysis based on adjusted by smoking status and intensity versus by smoking status only. Values more than one indicate a higher risk in patients with periodontal disease.

536x384mm (118 x 118 DPI)

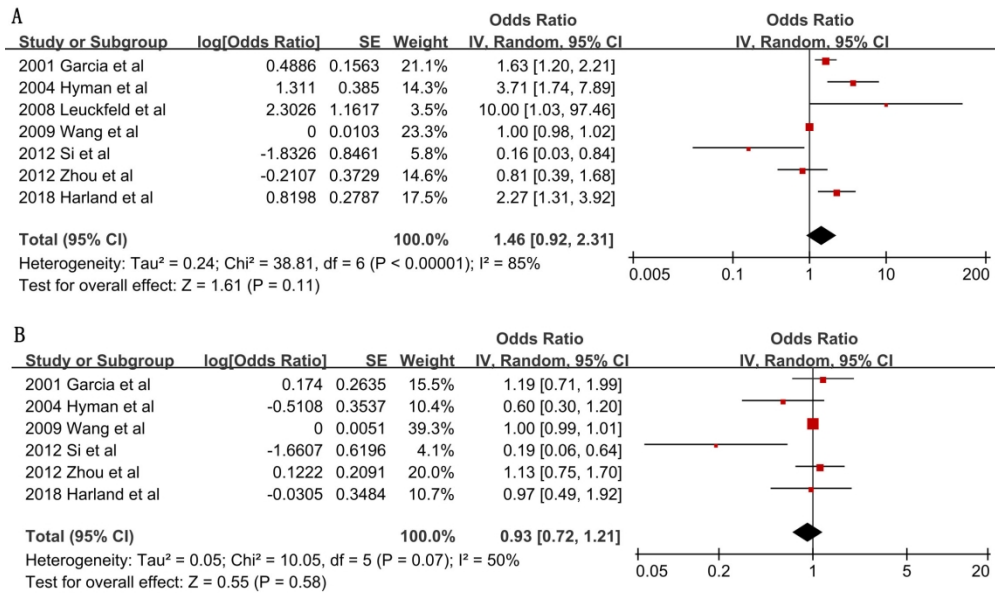

Figure 3 Forest plot of the risk of COPD by periodontal disease. A in smokers and B in never smokers. Values more than one indicate a higher risk in patients with periodontal disease.

192x118mm (300 x 300 DPI)

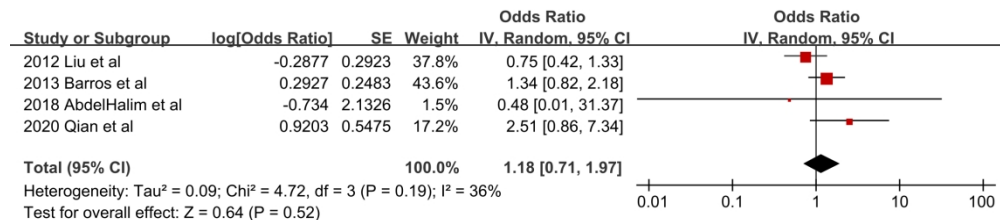

Figure 4 Forest plot of the risk of COPD-related events by periodontal disease. Values more than one indicate a higher risk in patients with periodontal disease.

497x118mm (118 x 118 DPI)

**Table S1** Search strategy**Search term**

1. (Oral health) OR (periodontal disease) OR (periodontal health) OR (periodontitis)  
OR (clinical attachment level) OR (alveolar bone loss) OR (probing depth)
2. (Respiratory disease) OR (chronic obstructive pulmonary disease) OR (pulmonary  
function) OR (airflow limitation)
3. 1 AND 2

For peer review only



**Table S2** Adjustment for confounders of included studies

| Study Author                               | Covariates in logistic regression multivariable model                                                                                                      |
|--------------------------------------------|------------------------------------------------------------------------------------------------------------------------------------------------------------|
| Hayes <i>et al</i> <sup>1</sup>            | Age, smoking, education, height                                                                                                                            |
| Scannapieco <i>et al</i> <sup>2</sup>      | Smoking                                                                                                                                                    |
| Garcia <i>et al</i> <sup>3</sup>           | Age, height, alcohol, education ( <b>with stratified analysis on smoking</b> )                                                                             |
| Leuckfeld <i>et al</i> <sup>4</sup>        | Age, female gender, <b>pack years of smoking</b>                                                                                                           |
| Liu <i>et al</i> <sup>5</sup>              | Age, gender, BMI and smoking                                                                                                                               |
| Wang <i>et al</i> <sup>6</sup>             | Age, gender, BMI ( <b>with stratified analysis on smoking</b> )                                                                                            |
| Si <i>et al</i> <sup>7</sup>               | Age, gender, occupation, educational level ( <b>with stratified analysis on smoking</b> )                                                                  |
| Zhou <i>et al</i> <sup>8</sup>             | Age, gender, smoking, BMI, season ( <b>with stratified analysis on smoking</b> )                                                                           |
| Ledić <i>et al</i> <sup>9</sup>            | Age, gender, <b>pack years of smoking</b> , BMI                                                                                                            |
| Lopez-de-Andrés <i>et al</i> <sup>10</sup> | Age, gender, smoking, educational level, DM, obesity                                                                                                       |
| Zhou <i>et al</i> <sup>11</sup>            | Age, gender, smoking, BMI                                                                                                                                  |
| Kataoka <i>et al</i> <sup>12</sup>         | Age, smoking                                                                                                                                               |
| Qian <i>et al</i> <sup>13</sup>            | Age, sex, education levels, BMI, smoking, drinking, hypertension, DM                                                                                       |
| Barros <i>et al</i> <sup>14</sup>          | Age, gender, Race, BMI, education, <b>pack years of smoking</b> , hypertension                                                                             |
| Scannapieco <i>et al</i> <sup>15</sup>     | Age, gender, <b>pack years of smoking</b> , Race, education, income, dental visits, alcohol, DM                                                            |
| Hyman <i>et al</i> <sup>16</sup>           | Age, gender, Race, history of hypertension and heart attack, dental visit within 1 year, BMI, family income ( <b>with stratified analysis on smoking</b> ) |
| Chung <i>et al</i> <sup>17</sup>           | Age, smoking, family income, education, alcohol, exercise, BMI, tooth brushing frequency, DM, number of natural teeth                                      |
| Harland <i>et al</i> <sup>18</sup>         | Age, number of present teeth, BMI, alcohol consumption, occupation, hypertension, DM ( <b>with stratified analysis on smoking</b> )                        |
| Takeuchi <i>et al</i> <sup>19</sup>        | Age, gender, <b>pack years of smoking</b> , occupation, DM, BMI, physical                                                                                  |

---

|                                       |                                                                                                                                                                                                                               |
|---------------------------------------|-------------------------------------------------------------------------------------------------------------------------------------------------------------------------------------------------------------------------------|
|                                       | activity, alcohol intake, number of present teeth                                                                                                                                                                             |
| Jung <i>et al</i> <sup>20</sup>       | Age, gender, smoking, educational level, household income, alcohol consumption, periodontal status, number of missing teeth, oral health factors                                                                              |
| Winning <i>et al</i> <sup>21</sup>    | Age, gender, smoking, height, BMI, exercise, DM, hypertension, MI, education level, living condition                                                                                                                          |
| AbdelHalim <i>et al</i> <sup>22</sup> | Age, BMI, low-level of education, <b>pack years of smoking</b> , MRC, CAT, hospitalizations, COPD category (C-D), FVC (% predicted), FEV1 (% predicted), FEV1 / FVC (% predicted), MMEF (% predicted), PEF (% predicted), CRP |

---

BMI, body mass index; CAT, chronic obstructive pulmonary disease assessment test; CRP, C-reactive protein; DM, diabetes mellitus; FEV1, forced expiratory volume in 1 second; FVC, forced vital capacity; MI, myocardial infarction; MMEF, maximum mid-expiratory flow; MRC, Medical Research Council; PEF, peak expiratory flow.

**Bold:** the covariate of smoking intensity (duration and dose) or stratified analyses on smoking status.

**Table S3** Quality assessment based on the Newcastle-Ottawa Scale**(A) Cohort study**

| Study<br>Author                     | Selection         |                      |                              |                        | Comparability | Outcome                  |                        |                             | Total<br>score |
|-------------------------------------|-------------------|----------------------|------------------------------|------------------------|---------------|--------------------------|------------------------|-----------------------------|----------------|
|                                     | Exposed<br>cohort | Nonexposed<br>cohort | Ascertainment<br>of exposure | Outcome<br>of interest |               | Assessment<br>of outcome | Length of<br>follow-up | Adequacy<br>of<br>follow-up |                |
| Barros <i>et al</i> <sup>14</sup>   | *                 | *                    | *                            | ...                    | ...           | *                        | *                      | *                           | 6              |
| Takeuchi <i>et al</i> <sup>19</sup> | *                 | *                    | *                            | *                      | ...           | *                        | *                      | *                           | 7              |
| Qian <i>et al</i> <sup>13</sup>     | ...               | *                    | *                            | ...                    | ...           | *                        | *                      | ...                         | 4              |

**(B) Case-control / cross-sectional study**

| Study<br>Author                               | Selection          |                                          |                      |                       | Comparability | Outcome                      |                                                              |                           | Total<br>score |
|-----------------------------------------------|--------------------|------------------------------------------|----------------------|-----------------------|---------------|------------------------------|--------------------------------------------------------------|---------------------------|----------------|
|                                               | Case<br>definition | Representati-<br>-veness of the<br>cases | Control<br>selection | Control<br>definition |               | Ascertainment<br>of exposure | Same method of<br>ascertainment<br>for cases and<br>controls | Non-<br>-response<br>rate |                |
| Hayes <i>et al</i> <sup>1</sup>               | *                  | ...                                      | *                    | *                     | *             | *                            | *                                                            | *                         | 7              |
| Scannapieco <i>et al</i> <sup>2</sup>         | ...                | *                                        | *                    | *                     | ...           | *                            | *                                                            | ...                       | 5              |
| Garcia <i>et al</i> <sup>3</sup>              | *                  | ...                                      | *                    | *                     | *             | *                            | *                                                            | *                         | 7              |
| Scannapieco <i>et al</i> <sup>15</sup>        | ...                | *                                        | *                    | *                     | ...           | *                            | *                                                            | *                         | 6              |
| Hyman <i>et al</i> <sup>16</sup>              | *                  | *                                        | *                    | *                     | ...           | *                            | *                                                            | *                         | 7              |
| Leuckfeld <i>et al</i> <sup>4</sup>           | *                  | ...                                      | ...                  | *                     | ...           | *                            | *                                                            | *                         | 5              |
| Wang <i>et al</i> <sup>6</sup>                | *                  | *                                        | ...                  | *                     | *             | *                            | *                                                            | *                         | 7              |
| Liu <i>et al</i> <sup>5</sup>                 | *                  | *                                        | ...                  | *                     | *             | *                            | *                                                            | *                         | 7              |
| Si <i>et al</i> <sup>7</sup>                  | *                  | *                                        | ...                  | *                     | *             | *                            | *                                                            | *                         | 7              |
| Zhou <i>et al</i> <sup>8</sup>                | *                  | *                                        | ...                  | *                     | *             | *                            | *                                                            | *                         | 7              |
| Ledić <i>et al</i> <sup>9</sup>               | *                  | *                                        | ...                  | *                     | *             | *                            | *                                                            | *                         | 7              |
| Chung <i>et al</i> <sup>17</sup>              | *                  | *                                        | *                    | *                     | ...           | *                            | *                                                            | *                         | 7              |
| AbdelHalim <i>et al</i> <sup>22</sup>         | *                  | ...                                      | ...                  | *                     | ...           | *                            | *                                                            | *                         | 5              |
| Harland <i>et al</i> <sup>18</sup>            | *                  | *                                        | ...                  | *                     | ...           | *                            | *                                                            | *                         | 6              |
| Lopez-de-Andrés<br><i>et al</i> <sup>10</sup> | ...                | *                                        | *                    | *                     | *             | ...                          | *                                                            | *                         | 6              |
| Jung <i>et al</i> <sup>20</sup>               | ...                | *                                        | *                    | *                     | ...           | *                            | *                                                            | *                         | 6              |
| Winning <i>et al</i> <sup>21</sup>            | *                  | *                                        | *                    | *                     | ...           | *                            | *                                                            | *                         | 7              |
| Zhou <i>et al</i> <sup>11</sup>               | *                  | *                                        | ...                  | ...                   | **            | *                            | *                                                            | *                         | 7              |
| Kataoka <i>et al</i> <sup>12</sup>            | *                  | *                                        | *                    | *                     | ...           | *                            | *                                                            | *                         | 7              |



**Figure S1** Sensitivity analysis on studies with larger sample size ( $N \geq 500$ ). Values more than one indicate a higher risk of COPD in patients with PD.

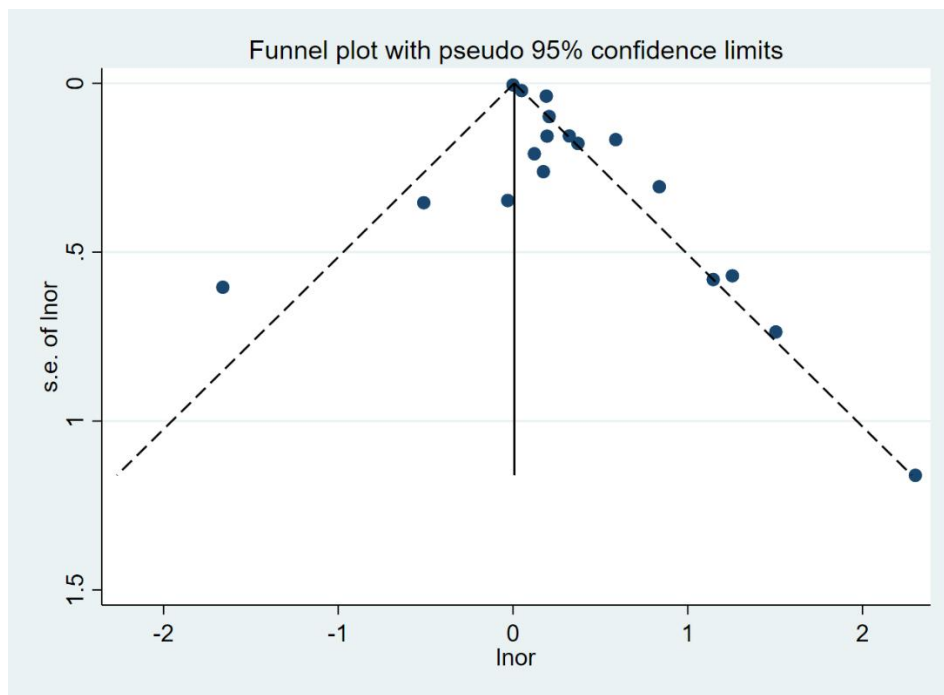

Figure S2 Funnel plot for the risk of COPD, with pseudo 95% confidence limits.

## References

1. Hayes C, Sparrow D, Cohen M, *et al.* The association between alveolar bone loss and pulmonary function: the VA Dental Longitudinal Study. *Ann Periodontol* 1998;3:257-261.
2. Scannapieco FA, Papandonatos GD, Dunford RG. Associations between oral conditions and respiratory disease in a national sample survey population. *Ann Periodontol* 1998;3:251-256.
3. Garcia RI, Nunn ME, Vokonas PS. Epidemiologic associations between periodontal disease and chronic obstructive pulmonary disease. *Ann Periodontol* 2001;6:71-77.
4. Leuckfeld I, Obregon-Whittle MV, Lund MB, *et al.* Severe chronic obstructive pulmonary disease: association with marginal bone loss in periodontitis. *Respir Med* 2008;102:488-494.
5. Liu Z, Zhang W, Zhang J, *et al.* Oral hygiene, periodontal health and chronic obstructive pulmonary disease exacerbations. *J Clin Periodontol* 2012;39:45-52.
6. Wang Z, Zhou X, Zhang J, *et al.* Periodontal health, oral health behaviours, and chronic obstructive pulmonary disease. *J Clin Periodontol* 2009;36:750-755.
7. Si Y, Fan H, Song Y, *et al.* Association between periodontitis and chronic obstructive pulmonary disease in a Chinese population. *J Periodontol* 2012;83:1288-1296.
8. Zhou X, Han J, Song Y, *et al.* Serum levels of 25-hydroxyvitamin D, oral health and chronic obstructive pulmonary disease. *J Clin Periodontol* 2012;39:350-356.
9. Ledić K, Marinković S, Puhar I, *et al.* Periodontal disease increases risk for chronic obstructive pulmonary disease. *Coll Antropol* 2013;37:937-942.
10. Lopez-de-Andrés A, Vazquez-Vazquez L, Martinez-Huedo MA, *et al.* Is COPD associated with periodontal disease? A population-based study in Spain. *Int J Chron Obstruct Pulmon Dis* 2018;13:3435-3445.
11. Zhou X, Wang J, Liu W, *et al.* Periodontal Status and Microbiologic Pathogens in Patients with Chronic Obstructive Pulmonary Disease and Periodontitis: A Case-Control Study. *Int J Chron Obstruct Pulmon Dis* 2020;15:2071-2079.
12. Kataoka S, Kimura M, Yamaguchi T, *et al.* A cross-sectional study of relationships between periodontal disease and general health: The Hitachi Oral Healthcare Survey. *BMC Oral Health* 2021;21:644.
13. Qian Y, Yuan W, Mei N, *et al.* Periodontitis increases the risk of respiratory disease mortality in older patients. *Exp Gerontol* 2020;133:110878.
14. Barros SP, Suruki R, Loewy ZG, *et al.* A cohort study of the impact of tooth loss and periodontal disease on respiratory events among COPD subjects: modulatory role of systemic biomarkers of inflammation. *PLoS One* 2013;8:e68592.
15. Scannapieco FA, Ho AW. Potential associations between chronic respiratory disease and periodontal disease: analysis of National Health and Nutrition Examination Survey III. *J Periodontol* 2001;72:50-56.
16. Hyman JJ, Reid BC. Cigarette smoking, periodontal disease: and chronic obstructive pulmonary disease. *J Periodontol* 2004;75:9-15.
17. Chung JH, Hwang HJ, Kim SH, *et al.* Associations Between Periodontitis and Chronic Obstructive Pulmonary Disease: The 2010 to 2012 Korean National Health and Nutrition Examination Survey. *J Periodontol* 2016;87:864-871.

- 1  
2  
3  
4  
5  
6  
7  
8  
9  
10  
11  
12  
13  
14  
15  
16  
17  
18  
19  
20  
21  
22  
23  
24  
25  
26  
27  
28  
29  
30  
31  
32  
33  
34  
35  
36  
37  
38  
39  
40  
41  
42  
43  
44  
45  
46  
47  
48  
49  
50  
51  
52  
53  
54  
55  
56  
57  
58  
59  
60
18. Harland J, Furuta M, Takeuchi K, *et al.* Periodontitis modifies the association between smoking and chronic obstructive pulmonary disease in Japanese men. *J Oral Sci* 2018;60:226-231.
  19. Takeuchi K, Matsumoto K, Furuta M, *et al.* Periodontitis Is Associated with Chronic Obstructive Pulmonary Disease. *J Dent Res* 2019;98:534-540.
  20. Jung ES, Lee KH, Choi YY. Association between oral health status and chronic obstructive pulmonary disease in Korean adults. *Int Dent J* 2020;70:208-213.
  21. Winning L, Polyzois I, Sanmartin Berglund J, *et al.* Periodontitis and airflow limitation in older Swedish individuals. *J Clin Periodontol* 2020;47:715-725.
  22. Abdelhalim H, Aboelnaga H, Aggour R. Chronic obstructive pulmonary disease exacerbations and periodontitis: a possible association. *Egyptian Journal of Bronchology* 2018;12.



## PRISMA 2009 Checklist

| Section/topic             | Item No | Checklist item                                                                                                                                                                                                                                                                                              | Reported on Page Number/Line Number | Reported on Section/Paragraph                  |
|---------------------------|---------|-------------------------------------------------------------------------------------------------------------------------------------------------------------------------------------------------------------------------------------------------------------------------------------------------------------|-------------------------------------|------------------------------------------------|
| <b>TITLE</b>              |         |                                                                                                                                                                                                                                                                                                             |                                     |                                                |
| Title                     | 1       | Identify the report as a systematic review, meta-analysis, or both.                                                                                                                                                                                                                                         | Page 1 / Line 2,3                   | Title page                                     |
| <b>ABSTRACT</b>           |         |                                                                                                                                                                                                                                                                                                             |                                     |                                                |
| Structured summary        | 2       | Provide a structured summary including, as applicable: background; objectives; data sources; study eligibility criteria, participants, and interventions; study appraisal and synthesis methods; results; limitations; conclusions and implications of key findings; systematic review registration number. | Page 2,3 / Line 28-52               | Abstract                                       |
| <b>INTRODUCTION</b>       |         |                                                                                                                                                                                                                                                                                                             |                                     |                                                |
| Rationale                 | 3       | Describe the rationale for the review in the context of what is already known.                                                                                                                                                                                                                              | Page 4,5 / Line 69-103              | Introduction / Paragraph 1-4                   |
| Objectives                | 4       | Provide an explicit statement of questions being addressed with reference to participants, interventions, comparisons, outcomes, and study design (PICOS).                                                                                                                                                  | Page 5 / Line 103-107               | Introduction / Paragraph 4                     |
| <b>METHODS</b>            |         |                                                                                                                                                                                                                                                                                                             |                                     |                                                |
| Protocol and registration | 5       | Indicate if a review protocol exists, if and where it can be accessed (e.g., Web address), and, if available, provide registration information including registration number.                                                                                                                               | Page 5,6 / Line 110-112             | Methods / Paragraph 1                          |
| Eligibility criteria      | 6       | Specify study characteristics (e.g., PICOS, length of follow-up) and report characteristics (e.g., years considered, language, publication status) used as criteria for eligibility, giving rationale.                                                                                                      | Page 6 / Line 118-124               | Methods / Paragraph 2                          |
| Information sources       | 7       | Describe all information sources (e.g., databases with dates of coverage, contact with study authors to identify additional studies) in the search and date last searched.                                                                                                                                  | Page 6 / Line 115,116               | Methods / Paragraph 2                          |
| Search                    | 8       | Present full electronic search strategy for at least one database, including any limits used, such that it could be repeated.                                                                                                                                                                               | Page 6 / Line 116-118               | Methods / Paragraph 2<br>Supplemental table S1 |
| Study selection           | 9       | State the process for selecting studies (i.e., screening, eligibility, included in systematic review, and, if applicable, included in the meta-analysis).                                                                                                                                                   | Page 6 / Line 125-131               | Methods / Paragraph 3                          |
| Data collection process   | 10      | Describe method of data extraction from reports (e.g., piloted forms, independently, in duplicate) and any processes for obtaining and confirming data from investigators.                                                                                                                                  | Page 7 / Line 134,135               | Methods / Paragraph 4                          |
| Data items                | 11      | List and define all variables for which data were sought (e.g., PICOS, funding sources) and any assumptions and simplifications made.                                                                                                                                                                       | Page 7 / Line 135-140               | Methods / Paragraph 4                          |



|                                    |    |                                                                                                                                                                                                                        |                                                      |                                                     |
|------------------------------------|----|------------------------------------------------------------------------------------------------------------------------------------------------------------------------------------------------------------------------|------------------------------------------------------|-----------------------------------------------------|
| Risk of bias in individual studies | 12 | Describe methods used for assessing risk of bias of individual studies (including specification of whether this was done at the study or outcome level), and how this information is to be used in any data synthesis. | Page 7 / Line 142-147                                | Methods / Paragraph 4                               |
| Summary measures                   | 13 | State the principal summary measures (e.g., risk ratio, difference in means).                                                                                                                                          | Page 7 / Line 150                                    | Methods / Paragraph 5                               |
| Synthesis of results               | 14 | Describe the methods of handling data and combining results of studies, if done, including measures of consistency (e.g., I <sup>2</sup> ) for each meta-analysis.                                                     | Page 8 / Line 156-160                                | Methods / Paragraph 5                               |
| Risk of bias across studies        | 15 | Specify any assessment of risk of bias that may affect the cumulative evidence (e.g., publication bias, selective reporting within studies).                                                                           | Page 8 / Line 171-173                                | Methods / Paragraph 7                               |
| Additional analyses                | 16 | Describe methods of additional analyses (e.g., sensitivity or subgroup analyses, meta-regression), if done, indicating which were pre-specified.                                                                       | Page 8 / Line 161-171                                | Methods / Paragraph 6,7                             |
| <b>RESULTS</b>                     |    |                                                                                                                                                                                                                        |                                                      |                                                     |
| Study selection                    | 17 | Give numbers of studies screened, assessed for eligibility, and included in the review, with reasons for exclusions at each stage, ideally with a flow diagram.                                                        | Page 9 / Line 181-188                                | Results / Paragraph 1; Figure 1                     |
| Study characteristics              | 18 | For each study, present characteristics for which data were extracted (e.g., study size, PICOS, follow-up period) and provide the citations.                                                                           | Page 9-12 / Line 189-223                             | Results / Paragraph 2-4; Table 1 and S2             |
| Risk of bias within studies        | 19 | Present data on risk of bias of each study and, if available, any outcome level assessment (see item 12).                                                                                                              | Page 12 / Line 225-231                               | Results / Paragraph 5; Table S3                     |
| Results of individual studies      | 20 | For all outcomes considered (benefits or harms), present, for each study: (a) simple summary data for each intervention group (b) effect estimates and confidence intervals, ideally with a forest plot.               | Page 12,13 / Line 234-243                            | Results / Paragraph 6; Figure 2 and 4               |
| Synthesis of results               | 21 | Present results of each meta-analysis done, including confidence intervals and measures of consistency.                                                                                                                | Page 12 / Line 234-236<br>Page 15 / Line 272-274     | Results / Paragraph 6,8; Figure 2 and 4             |
| Risk of bias across studies        | 22 | Present results of any assessment of risk of bias across studies (see Item 15).                                                                                                                                        | Page 12,13 / Line 237-238;<br>241-243                | Results / Paragraph 6; Figure S2                    |
| Additional analysis                | 23 | Give results of additional analyses, if done (e.g., sensitivity or subgroup analyses, meta-regression [see Item 16]).                                                                                                  | Page 12 / Line 238-240;<br>Page 13,14 / Line 244-267 | Results / Paragraph 6-8; Table 2, Figure 2,3 and S1 |
| <b>DISCUSSION</b>                  |    |                                                                                                                                                                                                                        |                                                      |                                                     |
| Summary of evidence                | 24 | Summarize the main findings including the strength of evidence for each main outcome; consider their relevance to key groups (e.g., healthcare providers, users, and policy makers).                                   | Page 15-18 / Line 277-343                            | Discussion / Paragraph 1-5                          |
| Limitations                        | 25 | Discuss limitations at study and outcome level (e.g., risk of bias), and at review-level (e.g., incomplete retrieval of identified research, reporting bias).                                                          | Page 18 / Line 346-365                               | Discussion / Paragraph 6                            |
| Conclusions                        | 26 | Provide a general interpretation of the results in the context of other evidence, and implications for future research.                                                                                                | Page 19 / Line 368-372                               | Conclusion / Paragraph 1                            |

| FUNDING |    |                                                                                                                                            |                        |         |
|---------|----|--------------------------------------------------------------------------------------------------------------------------------------------|------------------------|---------|
| Funding | 27 | Describe sources of funding for the systematic review and other support (e.g., supply of data); role of funders for the systematic review. | Page 20 / Line 388,389 | Funding |

**From:** Moher D, Liberati A, Tetzlaff J, Altman DG, The PRISMA Group (2009). Preferred Reporting Items for Systematic Reviews and Meta-Analyses: The PRISMA Statement. PLoS Med 6(7): e1000097. doi:10.1371/journal.pmed1000097

For more information, visit: [www.prisma-statement.org](http://www.prisma-statement.org).

Please leave this space alone as it will be supplemented by the editorial office when needed.

For peer review only

# BMJ Open

## The association between chronic obstructive pulmonary disease and periodontal disease: a systematic review and meta-analysis

|                                 |                                                                                                                                                                                                                                                                                                                                                                                                                                                                                                                                                                                                                                                                                                   |
|---------------------------------|---------------------------------------------------------------------------------------------------------------------------------------------------------------------------------------------------------------------------------------------------------------------------------------------------------------------------------------------------------------------------------------------------------------------------------------------------------------------------------------------------------------------------------------------------------------------------------------------------------------------------------------------------------------------------------------------------|
| Journal:                        | <i>BMJ Open</i>                                                                                                                                                                                                                                                                                                                                                                                                                                                                                                                                                                                                                                                                                   |
| Manuscript ID                   | bmjopen-2022-067432.R2                                                                                                                                                                                                                                                                                                                                                                                                                                                                                                                                                                                                                                                                            |
| Article Type:                   | Original research                                                                                                                                                                                                                                                                                                                                                                                                                                                                                                                                                                                                                                                                                 |
| Date Submitted by the Author:   | 16-May-2023                                                                                                                                                                                                                                                                                                                                                                                                                                                                                                                                                                                                                                                                                       |
| Complete List of Authors:       | Yang, Mei; Sichuan University West China Hospital, Department of Pulmonary and Critical Care Medicine<br>Peng, Ran; Sichuan University West China Hospital, Department of Pulmonary and Critical Care Medicine; 363 Hospital, Department of Respiratory and Critical Care Medicine<br>Li, Xiaoou; Sichuan University West China Hospital, Department of Pulmonary and Critical Care Medicine<br>Peng, Junjie; Sichuan University West China Hospital, Department of Pulmonary and Critical Care Medicine<br>Liu, Lin; 363 Hospital, Department of Respiratory and Critical Care Medicine<br>Chen, Lei; Sichuan University West China Hospital, Department of Pulmonary and Critical Care Medicine |
| <b>Primary Subject Heading</b>: | Respiratory medicine                                                                                                                                                                                                                                                                                                                                                                                                                                                                                                                                                                                                                                                                              |
| Secondary Subject Heading:      | Public health, Smoking and tobacco, Dentistry and oral medicine                                                                                                                                                                                                                                                                                                                                                                                                                                                                                                                                                                                                                                   |
| Keywords:                       | Chronic airways disease < THORACIC MEDICINE, RESPIRATORY MEDICINE (see Thoracic Medicine), ORAL MEDICINE, Emphysema < THORACIC MEDICINE                                                                                                                                                                                                                                                                                                                                                                                                                                                                                                                                                           |
|                                 |                                                                                                                                                                                                                                                                                                                                                                                                                                                                                                                                                                                                                                                                                                   |

SCHOLARONE™  
Manuscripts



I, the Submitting Author has the right to grant and does grant on behalf of all authors of the Work (as defined in the below author licence), an exclusive licence and/or a non-exclusive licence for contributions from authors who are: i) UK Crown employees; ii) where BMJ has agreed a CC-BY licence shall apply, and/or iii) in accordance with the terms applicable for US Federal Government officers or employees acting as part of their official duties; on a worldwide, perpetual, irrevocable, royalty-free basis to BMJ Publishing Group Ltd ("BMJ") its licensees and where the relevant Journal is co-owned by BMJ to the co-owners of the Journal, to publish the Work in this journal and any other BMJ products and to exploit all rights, as set out in our [licence](#).

The Submitting Author accepts and understands that any supply made under these terms is made by BMJ to the Submitting Author unless you are acting as an employee on behalf of your employer or a postgraduate student of an affiliated institution which is paying any applicable article publishing charge ("APC") for Open Access articles. Where the Submitting Author wishes to make the Work available on an Open Access basis (and intends to pay the relevant APC), the terms of reuse of such Open Access shall be governed by a Creative Commons licence – details of these licences and which [Creative Commons](#) licence will apply to this Work are set out in our licence referred to above.

Other than as permitted in any relevant BMJ Author's Self Archiving Policies, I confirm this Work has not been accepted for publication elsewhere, is not being considered for publication elsewhere and does not duplicate material already published. I confirm all authors consent to publication of this Work and authorise the granting of this licence.

1  
2  
3  
4  
5  
6  
7  
8  
9  
10  
11  
12  
13  
14  
15  
16  
17  
18  
19  
20  
21  
22  
23  
24  
25  
26  
27  
28  
29  
30  
31  
32  
33  
34  
35  
36  
37  
38  
39  
40  
41  
42  
43  
44  
45  
46  
47  
48  
49  
50  
51  
52  
53  
54  
55  
56  
57  
58  
59  
60

## 1 **Title Page**

2 **Title:** The association between chronic obstructive pulmonary disease and periodontal  
3 disease: a systematic review and meta-analysis

4  
5 **Authors' full names:** Mei Yang<sup>1\*</sup>, Ran Peng<sup>1,2\*</sup>, Xiaou Li<sup>1\*</sup>, Junjie Peng<sup>1</sup>, Lin Liu<sup>2#</sup>,  
6 Lei Chen<sup>1#</sup>

7 **Authors' affiliations:** <sup>1</sup>Department of Pulmonary and Critical Care Medicine, West  
8 China Hospital, Sichuan University, Chengdu, Sichuan 610041, China.

9 <sup>2</sup>Department of Respiratory and Critical Care Medicine, 363 Hospital, Chengdu, Sichuan  
10 610041, China

11  
12 \* Contributed equally.

13  
14 **#Correspondence to:** Lei Chen (lchens@126.com), Department of Pulmonary and  
15 Critical Care Medicine, West China Hospital, Sichuan University, Chengdu, Sichuan  
16 610041, China; Lin Liu (lliniu@126.com), Department of Respiratory and Critical Care  
17 Medicine, 363 Hospital, Chengdu, Sichuan 610041, China

18  
19 **Word count of the abstract:** 274

20 **Word count of the main text:** 3168

21

1  
2  
3  
4  
5 22  
6  
7

8 23 **The association between chronic obstructive pulmonary**  
9  
10 24 **disease and periodontal disease: a systematic review and**  
11  
12  
13 25 **meta-analysis**  
14  
15

16 26

17  
18 27 **ABSTRACT**

19  
20 28 **Objectives** Studies have suggested contradictory results on the relationship between  
21  
22  
23 29 chronic obstructive pulmonary disease (COPD) and periodontal disease (PD). The aim  
24  
25  
26 30 of this study was to determine whether PD increased the risk of COPD and COPD-  
27  
28  
29 31 related clinical events.

30  
31 32 **Design** Systematic review and meta-analysis.

32  
33 33 **Data sources** PubMed, EMBASE and CENTRAL were searched from inception to 22  
34  
35  
36 34 February 2023.

37  
38 35 **Eligibility criteria for studies** We included trials and observational studies evaluating  
39  
40  
41 36 association of PD with the risk of COPD or COPD-related events (exacerbation and  
42  
43  
44 37 mortality), with statistical adjustment for smoking.

45  
46 38 **Data extraction and synthesis** Two investigators independently extracted data from  
47  
48  
49 39 selected studies using a standardized Excel file. Quality of studies was evaluated using  
50  
51  
52 40 the Newcastle-Ottawa Scale. Odds ratio (OR) with 95% confident interval (CI) was  
53  
54  
55 41 pooled in a random-effect model with inverse variance method.

56  
57 42 **Results** 22 observational studies with 51704 participants were included. Pooled analysis  
58  
59  
60

1  
2  
3  
4  
5 43 of 18 studies suggested that PD was weakly associated with the risk of COPD (OR 1.20,  
6  
7  
8 44 95% CI 1.09 to 1.32). However, in stratified and subgroup analyses, with strict  
9  
10 45 adjustment for smoking, PD no longer related to the risk of COPD (adjusting for  
11  
12  
13 46 smoking intensity: OR 1.14, 95% CI 0.86 to 1.51; smokers only: OR 1.46, 95% CI 0.92  
14  
15 47 to 2.31; never smokers only: OR 0.93, 95% CI 0.72 to 1.21). Moreover, PD did not  
16  
17  
18 48 increase the risk of COPD-related exacerbation or mortality (OR 1.18, 95% CI 0.71 to  
19  
20  
21 49 1.97) in the pooled result of four studies.

22  
23 50 **Conclusions** This study demonstrates PD confers no risk for COPD and COPD-related  
24  
25  
26 51 events when strictly adjusted by smoking. Large-scale prospective cohort studies with  
27  
28  
29 52 control of potential confounding factors are warranted to validate the present findings.

30  
31 53

## 32 33 54 **STRENGTHS AND LIMITATIONS OF THIS STUDY**

- 34  
35  
36 55 1. This is the largest systematic review and meta-analysis on association between  
37  
38  
39 56 chronic obstructive pulmonary disease (COPD) and periodontal disease (PD)  
40  
41  
42 57 collecting data over 20 years.
- 43  
44 58 2. This is the first meta-analysis investigating whether PD increases the risk of COPD-  
45  
46  
47 59 related events (exacerbation or mortality).
- 48  
49 60 3. Compared with previous reports, this study was conducted with more strict  
50  
51  
52 61 adjustment for confounding by smoking, which was the most important confounder  
53  
54  
55 62 in the COPD-PD relationship.
- 56  
57 63 4. Our study provided limited evidence on the outcome of COPD-related events  
58  
59  
60

1  
2  
3  
4  
5 64 because of limited data.  
6  
7

8 65 5. Clinical heterogeneity and publication bias compromised the evidence strength of  
9  
10 66 this study, although subgroup and stratified analyses were performed.  
11  
12

13 67

## 15 68 **INTRODUCTION**

17  
18 69 Chronic obstructive pulmonary disease (COPD) is the third leading cause of death,  
19  
20 70 resulting in enormous economic burden.<sup>1</sup> Commonly, COPD coexists with a variety of  
21  
22 71 disorders, called comorbidities, which play significant roles in the progression and  
23  
24 72 prognosis of COPD.<sup>2 3</sup> Understanding the COPD-comorbidities relationship has been a  
25  
26 73 momentous prerequisite for optimizing disease prevention and management strategies.<sup>2</sup>  
27  
28  
29

30  
31 74 <sup>3</sup>

32  
33  
34 75 Given ageing and widespread use of inhaled corticosteroids in COPD, periodontal  
35  
36 76 disease (PD) has been a common comorbidity of COPD.<sup>4</sup> It is a chronic inflammatory  
37  
38 77 condition of tissues surrounding and supporting the teeth, including gingiva, bone and  
39  
40 78 ligament,<sup>5</sup> with the prevalence estimates over 10% around the world and especially  
41  
42 79 prevalent in elderly individuals.<sup>6</sup> To date, diagnosis and assessment of PD are mostly  
43  
44 80 based on periodontal measurements including clinical attachment level (CAL), probing  
45  
46 81 pocket depth (PPD) and alveolar bone loss (ABL).<sup>5</sup> They are primary clinical  
47  
48 82 manifestations of PD, reflecting the extent of periodontal tissue destruction.<sup>5</sup>  
49  
50  
51

52  
53  
54 83 Based on the nature of inflammation,<sup>5 7</sup> mounting evidence has shed light on the  
55  
56 84 association between PD and development of COPD.<sup>8 9</sup> Currently three points are  
57  
58  
59  
60



1  
2  
3  
4  
5 85 proposed. First, they share the same risk factors, such as age, gender, smoking and  
6  
7  
8 86 socioeconomic status.<sup>2 10</sup> Second, they have similar pathogenetic mechanisms. Both  
9  
10 87 diseases are characterized by host susceptibility to environmental factors, immune  
11  
12  
13 88 overreaction, oxidative stress and production of pro-inflammatory cytokines.<sup>7 8</sup> Most  
14  
15  
16 89 importantly, neutrophilic inflammation plays a key role in both diseases.<sup>8 11</sup> Third, oral  
17  
18 90 bacteria released from the dental plaque in PD could trigger progression and acute  
19  
20  
21 91 exacerbation (AE) of COPD.<sup>12 13</sup>

22  
23 92 Meanwhile, epidemiological evidence has indicated that PD increases risk of COPD<sup>11</sup>  
24  
25  
26 93 <sup>14 15</sup> and COPD-related events.<sup>13 16</sup> Scannapieco *et al* revealed a 4.5-fold increased risk  
27  
28  
29 94 of COPD in patients with PD, compared with those without.<sup>14</sup> A dose-response  
30  
31  
32 95 relationship was further implied between PD severity and lung function.<sup>15</sup> Among  
33  
34  
35 96 patients with both diseases, COPD-related AE and mortality also significantly linked  
36  
37  
38 97 with periodontal status.<sup>13 16</sup> Periodontal therapy, such as scaling and root planing  
39  
40  
41 98 treatment, may ameliorate lung function and decrease frequency of AE in COPD with  
42  
43  
44 99 chronic periodontitis.<sup>17 18</sup> However, there were some other studies revealing opposite  
45  
46  
47 100 results, resulting in a long-standing controversy.<sup>19-21</sup> It is worth noting that, parameters  
48  
49  
50 101 used to determine PD apparently varied across studies, and these studies also failed to  
51  
52  
53 102 adequately control for confounders, especially smoking, the most important confounder  
54  
55  
56 103 for the COPD-PD relationship. Therefore, to provide the latest and most convincing  
57  
58  
59 104 evidence, we systematically reviewed current available literature to investigate whether  
60  
61  
62 105 PD increases the risk of COPD. The secondary objective was to evaluate the association

1  
2  
3  
4  
5 106 between PD and the risk of COPD-related events. Subgroup and stratified analyses were  
6  
7 107 also conducted to adjust for the confounding by smoking.  
8  
9

10  
11 108

## 12 109 **METHODS**

13  
14  
15 110 This systematic review and meta-analysis was conducted and reported in accordance to  
16  
17  
18 111 the Preferred Reporting Items for Systematic Reviews and Meta-Analyses (PRISMA)  
19  
20 112 guideline.<sup>22</sup>  
21  
22

23 113

### 24 114 **Search strategy and selection criteria**

25  
26  
27 115 We searched PubMed, EMBASE and CENTRAL for records evaluating association  
28  
29  
30 116 between COPD and PD, from inception to 22 February 2023. The search strategy was  
31  
32  
33 117 described in **online supplemental table 1**. The language was restricted to English, for  
34  
35  
36 118 the purpose of rapid review.<sup>23</sup> Studies meeting the following criteria were included: (1)  
37  
38 119 adult participants ( $\geq 18$  years); (2) original studies with randomized controlled trial  
39  
40  
41 120 (RCT), cohort, case-control or cross-sectional study designs; (3) presenting clear  
42  
43  
44 121 diagnostic or assessment criteria for COPD and PD; (4) evaluating association between  
45  
46 122 PD and the risk of COPD, or risk of COPD-related events (AE and mortality), with  
47  
48  
49 123 statistical adjustment for smoking, and providing the adjusted odds ratio (OR), relative  
50  
51  
52 124 risk (RR) or hazard ratio (HR) for the risk of COPD, AE and mortality in relation to PD.

53  
54 125 According to the inclusion criteria, two independent investigators (MY and XL)  
55  
56  
57 126 performed systematical search, screened titles and abstracts of all retrieved studies to  
58  
59  
60

1  
2  
3  
4  
5 127 exclude duplicate or irrelevant records. For articles requiring further assessment, full-  
6  
7  
8 128 text reviews were carried out and references of retrieved articles and relevant reviews  
9  
10 129 were also manually checked to identify additional eligible studies. Disagreements were  
11  
12  
13 130 resolved by discussion between the two reviewers or with the help of the third  
14  
15 131 investigator (RP).

16  
17  
18 132

### 19 20 133 **Data extraction and quality assessment**

21  
22  
23 134 Two investigators (MY and RP) independently extracted data from selected studies  
24  
25  
26 135 using a standardized Excel (Microsoft Corporation) file. The following information was  
27  
28  
29 136 extracted: author, year of publication, country, study design, number of subjects (COPD  
30  
31 137 and non-COPD), demographic characteristics of participants, periodontal variables  
32  
33  
34 138 applied to assess PD, diagnostic criteria for COPD, definition of COPD-related AE and  
35  
36 139 mortality, adjusted OR, RR or HR for the risk of COPD, AE and mortality in relation to  
37  
38  
39 140 PD, as well as adjustment for confounders. The primary outcome was the risk of COPD.  
40  
41  
42 141 Secondary outcome was the risk of COPD-related adverse events, including AE and  
43  
44 142 mortality. Quality of studies was independently evaluated using the Newcastle-Ottawa  
45  
46 143 Scale<sup>24</sup> by two investigators (MY and XL). A score of  $\geq 6$  was considered a low risk  
47  
48  
49 144 while  $< 6$  a high risk of bias. Both case-control and cohort studies had a maximum score  
50  
51  
52 145 of 9. Cross-sectional study was regarded as case-control study when performing quality  
53  
54 146 assessment. Discrepancies regarding data extraction and quality assessment were  
55  
56  
57 147 resolved through discussion and consensus.  
58  
59  
60

1  
2  
3  
4  
5 148  
6  
78 149 **Data analysis**  
9

10 150 The final pooled estimate was expressed as OR with 95% confident interval (CI).  
11  
12 151 Considering CAL, ABL and PPD have been regarded as the primary parameters for  
13  
14 152 PD,<sup>25 26</sup> where more than one adjusted estimate was shown in the paper, we preferentially  
15  
16 153 used the estimate regarding these parameters (CAL > ABL > PPD), or the estimate being  
17  
18 154 better adjusted for tobacco smoking (never smokers > adjusting for smoking intensity  
19  
20 155 [duration and dose] > adjusting for smoking status), or the estimate regarding more  
21  
22 156 severe PD, where available. For case-control and cross-sectional studies, we estimated  
23  
24 157 the OR whereas for cohort studies we estimated the RR or HR. The random-effect model  
25  
26 158 with inverse variance method were applied due to potential heterogeneity resulting from  
27  
28 159 methodological differences. Heterogeneity across studies was identified with the I<sup>2</sup>  
29  
30 160 statistic. I<sup>2</sup> statistic >50% indicated significant heterogeneity.  
31  
32  
33  
34  
35  
36  
37  
38

39 161 To explore heterogeneity, subgroup analyses were conducted based on study design  
40  
41 162 (case-control, cross-sectional and cohort studies), geographical location (Asia, North  
42  
43 163 America, Europe), assessment of PD (CAL, ABL and PPD), definition of COPD (Global  
44  
45 164 Initiative for Chronic Obstructive Lung Diseases, GOLD and non-GOLD criteria) and  
46  
47 165 adjustment for smoking intensity (dose and duration of smoking). To better control the  
48  
49 166 confounding effect of smoking, stratified analyses were performed in smokers and never  
50  
51 167 smokers respectively.  
52  
53  
54  
55

56  
57 168 To test the robustness of study findings, we performed sensitivity analysis on studies  
58  
59  
60

1  
2  
3  
4  
5 169 with relatively large sample size ( $\geq 500$  participants), which tended to be more  
6  
7  
8 170 representative of the general population and with smaller bias in the overall estimates in  
9  
10 171 meta-analyses.<sup>27</sup> Additionally, influence of a single study on the overall pooled estimate  
11  
12  
13 172 was tested by omitting one study in each turn. Publication bias was visually assessed  
14  
15 173 using a funnel plot and quantitatively evaluated by the Egger's tests.  $P < 0.05$  was  
16  
17  
18 174 considered statistically significant. All statistical analyses were performed using Stata  
19  
20 175 version 16 (StataCorp) and Review manager version 5.4 (Cochrane Collaboration).  
21  
22

23 176

### 24 25 177 **Patient and public involvement**

26  
27  
28 178 No patients or other individuals are involved in the design, conduct, reporting or  
29  
30  
31 179 dissemination of this research.  
32

33 180

## 34 35 181 **RESULTS**

### 36 37 182 **Study selection and characteristics**

38  
39 183 A total of 30165 records were identified from the initial database search. 13662 records  
40  
41  
42 184 were removed for duplicates, and 16227 records were excluded after titles and abstracts  
43  
44  
45 185 screening because of irrelevant content and animal studies. The remaining 276 full-text  
46  
47  
48 186 articles were identified for eligibility, of which 254 were excluded for reasons including  
49  
50  
51 187 duplicates (six studies), reviews (183 studies), insufficient information (nine studies) and  
52  
53  
54 188 ineligible designs and outcomes (56 studies). Finally, 22 studies<sup>14-16 19-21 28-43</sup> were  
55  
56  
57 189 included in the review. The selection process is shown in **figure 1**.  
58  
59  
60

1  
2  
3  
4  
5 190 The characteristics of included 22 studies were shown in **table 1**. The number of  
6  
7  
8 191 participants was 51704 and there were 9973 (18.9%) patients with COPD. The mean age  
9  
10 192 of patients with COPD was between 45.1 and 83.1 years while the control subjects was  
11  
12  
13 193 between 42.2 and 80.3 years. These studies were published between 1998 and 2021. The  
14  
15 194 sample size ranged from 120 to 13792. Nine studies were case-control studies<sup>15 19 28 29 32</sup>  
16  
17  
18 195 <sup>33 36 40 42</sup> and 10 studies were cross-sectional studies,<sup>14 20 30 31 34 35 38 39 41 43</sup> only three  
19  
20 196 studies with a cohort study design.<sup>16 21 37</sup> Additionally, 11 studies were conducted in  
21  
22  
23 197 Asia,<sup>15 16 19 32 34 35 37 38 40-42</sup> while six studies in the North America,<sup>14 20 21 28-30</sup> four studies  
24  
25  
26 198 in Europe<sup>31 33 36 39</sup> and one study in Africa.<sup>43</sup>

199

200

**Table 1** Characteristics of included studies

| Year / Study                                | Design          | Location      | No. COPD /<br>Control subjects | Age (COPD /<br>Control subjects) | Assessment of<br>PD | Assessment of<br>COPD |
|---------------------------------------------|-----------------|---------------|--------------------------------|----------------------------------|---------------------|-----------------------|
| 1998 Hayes <i>et al</i> <sup>28</sup>       | Case-control    | United States | 261/857                        | 45.1±9.7/42.2±9.1                | ABL                 | FEV <sub>1</sub>      |
| 1998 Scannapieco <i>et al</i> <sup>14</sup> | Cross-sectional | United States | 77/309                         | NA                               | OHI                 | Self-reported         |
| 2001 Garcia <i>et al</i> <sup>29</sup>      | Case-control    | United States | 279/833                        | NA                               | ABL, PPD            | FEV <sub>1</sub>      |
| 2001 Scannapieco <i>et al</i> <sup>30</sup> | Cross-sectional | United States | 810/12,982                     | 51.2±17.9/43.9±17.7              | CAL, GB             | Self-reported         |
| 2004 Hyman <i>et al</i> <sup>20</sup>       | Cross-sectional | United States | 993/6,632                      | 62.3±14.1/47.4±14.2              | CAL                 | GOLD                  |
| 2008 Leuckfeld <i>et al</i> <sup>31</sup>   | Cross-sectional | Norway        | 130/50                         | 54.9±4.9/47.0±9.8                | ABL                 | GOLD                  |
| 2009 Wang <i>et al</i> <sup>19</sup>        | Case-control    | China         | 306/328                        | 63.9±9.8/63.3±9.0                | CAL, PLI            | GOLD                  |
| 2012 Liu <i>et al</i> <sup>42</sup>         | Case-control    | China         | 183/209*                       | 64.3±10.1/63.6±9.7               | CAL, PPD, BI        | GOLD                  |

1  
2  
3  
4  
5  
6  
7  
8  
9  
10  
11  
12  
13  
14  
15  
16  
17  
18  
19  
20  
21  
22  
23  
24  
25  
26  
27  
28  
29  
30  
31  
32  
33  
34  
35  
36  
37  
38  
39  
40  
41  
42  
43  
44  
45  
46  
47  
48  
49  
50  
51  
52  
53  
54  
55  
56  
57  
58  
59  
60

|                                                 |                 |               |                        |                    |                           |                        |
|-------------------------------------------------|-----------------|---------------|------------------------|--------------------|---------------------------|------------------------|
| 2012 Si <i>et al</i> <sup>15</sup>              | Case-control    | China         | 581/438                | 63.9±9.4/62.8±9.5  | CAL, ABL, PPD,<br>PLI, BI | GOLD                   |
| 2012 Zhou <i>et al</i> <sup>32</sup>            | Case-control    | China         | 193/181                | 63.6±0.3/62.1±9.1  | CAL, ABL, PPD,<br>PLI, BI | GOLD                   |
| 2013 Barros <i>et al</i> <sup>21</sup>          | Cohort          | United States | 399/1,236 <sup>§</sup> | 63.9±5.7/66.0±5.1  | CAL, PPD                  | GOLD                   |
| 2013 Ledić <i>et al</i> <sup>33</sup>           | Case-control    | Croatia       | 93/43                  | 65.8±9.7/62.1±11.9 | CAL                       | GOLD                   |
| 2016 Chung <i>et al</i> <sup>34</sup>           | Cross-sectional | Korea         | 697/5,181              | 64.3±0.2/54.6±0.1  | PPD, GB                   | GOLD                   |
| 2018 AbdelHalim <i>et al</i> <sup>43</sup>      | Cross-sectional | Egypt         | 134/116*               | 56.8±10.4/55.3±9.1 | CAL, PPD, BI,<br>PLI, OHI | GOLD                   |
| 2018 Harland <i>et al</i> <sup>35</sup>         | Cross-sectional | Japan         | 149/1,325              | 61.3±9.1/54.5±8.7  | PPD                       | GOLD                   |
| 2018 Lopez-de-Andrés <i>et al</i> <sup>36</sup> | Case-control    | Spain         | 2,699/2,699            | 63±14/61±14        | Self-reported             | Self-reported          |
| 2019 Takeuchi <i>et al</i> <sup>37</sup>        | Cohort          | Japan         | 22/878                 | NA                 | CAL, PPD                  | GOLD                   |
| 2020 Jung <i>et al</i> <sup>38</sup>            | Cross-sectional | Korea         | 1,134/6,585            | 62.6±0.4/53.6±0.2  | PPD                       | FEV <sub>1</sub> / FVC |
| 2020 Qian <i>et al</i> <sup>16</sup>            | Cohort          | China         | 23 <sup>‡</sup> /NA    | 83.1±4.8/80.3±3.7  | ABL                       | NR                     |
| 2020 Winning <i>et al</i> <sup>39</sup>         | Cross-sectional | Sweden        | 86/740                 | NA                 | ABL                       | GOLD                   |
| 2020 Zhou <i>et al</i> <sup>40</sup>            | Case-control    | China         | 60/60                  | 63.1±10.1/60.0±9.4 | CAL, PLI                  | GOLD                   |
| 2021 Kataoka <i>et al</i> <sup>41</sup>         | Cross-sectional | Japan         | 464/249                | 54.1±9.4/NA        | PPD                       | GOLD                   |

- 201 Continuous data are presented as mean ± standard deviation (SD) unless otherwise indicated.
- 202 \*No. COPD subjects with frequent exacerbation (≥2 exacerbations in the last year)/Infrequent exacerbation (< 2
- 203 exacerbations in the last year).
- 204 <sup>§</sup>No. COPD subjects with events (hospitalization for exacerbation or COPD-related death) in the 5-year follow-up
- 205 visit/COPD subjects without events in the 5-year follow-up visit.
- 206 <sup>‡</sup>No. COPD-related mortality in a follow-up visit more than 5 years.
- 207 ABL, alveolar bone loss; BI, bleeding index; CAL, clinical attachment level; FEV<sub>1</sub>, forced expiratory volume in 1
- 208 second; FVC, forced vital capacity; GB, gingival bleeding; GOLD, Global Initiative for Chronic Obstructive Lung

209 Disease; NA, not available; OHI, oral health index; PD, periodontal disease; PLI, plaque index; PPD, probing pocket  
210 depth.

211

212 All included articles performed multivariable analyses, in which the risk of COPD, or  
213 risk of COPD-related events (AE or mortality), was identified as the dependent variable  
214 and PD as the independent variable. Controlling for confounding by smoking included  
215 stratification (smokers and never smokers) or covariance adjustment in multivariable  
216 models (the degree of control: never smokers > adjusting for smoking intensity [duration  
217 and dose] > adjusting for smoking status).

218 The adjustment for confounders of included studies was detailedly presented in **online**  
219 **supplemental table 2**. 16 articles reported the adjusted ORs and 4 reported adjusted RRs,  
220 two studies reporting HRs. Definition of COPD comprised the GOLD criteria,<sup>2</sup> FEV<sub>1</sub>  
221 <65% of predicted volume, having a history of chronic bronchitis and / or emphysema,  
222 self-reported and others. Periodontal parameters used for PD assessment were CAL,  
223 ABL, PPD, gingival bleeding (GB), bleeding index (BI), plaque index (PLI) and oral  
224 health index (OHI).

225

### 226 **Assessment of bias**

227 Based on the Newcastle-Ottawa Scale, quality assessment for the 22 studies was shown  
228 in **online supplemental table 3**. Among them, 18 studies<sup>15 19-21 28-30 32-42</sup> were rated as  
229 high quality with a total score of  $\geq 6$  whereas four studies<sup>14 16 31 43</sup> as a score of <6,  
230 indicating a high risk of bias. The main reasons for lower scores were selection bias  
231 (representativeness of sample population), especially for control groups and



232 comparability of cases and control subjects.

233

234 **Primary outcome**

235 18 studies<sup>14 15 19 20 28-41</sup> provided data for the risk of COPD in relation to PD. Quantitative  
236 analysis demonstrated that after adjusting for smoking status, PD increased the risk of  
237 COPD, but only by a ratio of 1.20 (95% CI 1.09 to 1.32,  $p=0.0002$ ,  $I^2=79\%$ ) (**figure 2**).  
238 Further exclusion of any single study did not materially alter the overall pooled OR, with  
239 a range from 1.17 (95% CI 1.06-1.28) to 1.28 (95% CI 1.12-1.46). Sensitivity analysis  
240 limited to studies with larger sample size ( $\geq 500$ )<sup>15 19 20 28-30 34-39 41</sup> revealed similar results  
241 (OR 1.24, 95% CI 1.08 to 1.43,  $p=0.003$ ,  $I^2=82\%$ ) (**online supplemental figure 1**).  
242 However, significant publication bias was noted by visual inspections of the funnel plot  
243 (**online supplemental figure 2**) and the Egger's test for small study effects (bias  
244 coefficient 1.49, 95% CI 0.44 to 2.55,  $p=0.008$ ).

245 Subgroup analyses indicated that assessment parameters of PD ( $p=0.02$ ), study design  
246 ( $p=0.05$ ) and diagnosis of COPD ( $p=0.05$ ) were the potential main causes of  
247 heterogeneity (**table 2**). Moreover, there were several findings in subgroup analyses.  
248 First, after further controlling for smoking intensity, PD did not increase the risk of  
249 COPD (OR 1.14, 95% CI 0.86 to 1.51,  $p=0.38$ , 10 studies<sup>15 19 20 29-33 35 37</sup>), similar to the  
250 subgroup applying a GOLD criterion (OR 1.10, 95% CI 1.00 to 1.22,  $p=0.06$ , 12  
251 studies<sup>15 19 20 31-35 37 39-41</sup>). Second, among the parameters of CAL, ABL and PPD, only  
252 subgroup using the parameter of ABL showed a significant association between PD and

253 the risk of COPD (OR 1.98, 95% CI 1.32 to 2.97,  $p=0.001$ , six studies<sup>15 28 29 31 32 39</sup>).

254 Third, in the three geographical locations (Asia, North America and Europe), only the

255 subgroup of Europe indicated that PD increased the risk of COPD (OR 2.05, 95% CI

256 1.07 to 3.95,  $p=0.03$ , four studies<sup>31 33 36 39</sup>).

257

258 **Table 2** Subgroup analyses regarding the risk of COPD

| Subgroups                                   | No. Studies | No. Participants<br>/Cases | OR value<br>(95% CI) | P<br>value    | I <sup>2</sup> , % |
|---------------------------------------------|-------------|----------------------------|----------------------|---------------|--------------------|
| Adjusted for smoking intensity <sup>a</sup> |             |                            |                      |               |                    |
| Yes                                         | 10          | 27,246 / 3,556             | 1.14 (0.86-1.51)     | 0.38          | 67                 |
| No                                          | 8           | 22,158 / 5,478             | 1.29 (1.13-1.48)     | <b>0.0002</b> | 75                 |
| Assessment of PD                            |             |                            |                      |               |                    |
| CAL                                         | 8           | 24,600 / 3,058             | 1.04 (0.96-1.14)     | 0.33          | 75                 |
| ABL                                         | 6           | 4,629 / 1,530              | 1.98 (1.32-2.97)     | <b>0.001</b>  | 56                 |
| PPD                                         | 8           | 19,189 / 3,519             | 1.16 (0.89-1.51)     | 0.27          | 63                 |
| Geographical location                       |             |                            |                      |               |                    |
| Asia                                        | 9           | 18,831 / 3,606             | 1.07 (0.99-1.17)     | 0.08          | 65                 |
| North America                               | 5           | 24,033 / 2,420             | 1.37 (0.93-2.01)     | 0.11          | 63                 |
| Europe                                      | 4           | 6,540 / 3,008              | 2.05 (1.07-3.95)     | <b>0.03</b>   | 71                 |
| Assessment of COPD                          |             |                            |                      |               |                    |
| GOLD                                        | 12          | 19,879 / 3,774             | 1.10 (1.00-1.22)     | 0.06          | 71                 |

|                 |   |                |                   |               |    |
|-----------------|---|----------------|-------------------|---------------|----|
| Non-GOLD        | 6 | 29,525 / 5,260 | 1.35 (1.14-1.61)  | <b>0.0007</b> | 46 |
| Study design    |   |                |                   |               |    |
| Case-control    | 8 | 9,911 / 4,472  | 1.12 (1.01-1.24)  | <b>0.03</b>   | 86 |
| Cross-sectional | 9 | 38,593 / 4,540 | 1.34 (1.08-1.66)  | <b>0.007</b>  | 45 |
| Cohort          | 1 | 878 / 22       | 3.51 (1.15-10.74) | <b>0.03</b>   | -  |

259 <sup>a</sup>Duration and dose of smoking.

260 ABL, alveolar bone loss; CAL, clinical attachment level; CI, confident interval; GOLD, Global  
 261 Initiative for Chronic Obstructive Lung Disease; OR, odds ratio; PD, periodontal disease; PPD,  
 262 probing pocket depth.

263 **Bold:** subgroups with positive results.

264

265 Stratified analyses regarding smoking status revealed that PD did not increase the risk  
 266 of COPD whether in smokers (OR 1.46, 95% CI 0.92 to 2.31, p=0.11, seven studies<sup>15 19</sup>  
 267 <sup>20 29 31 32 35</sup>) or never smokers (OR 0.93, 95% CI 0.72 to 1.21, p=0.58, six studies<sup>15 19 20 29</sup>  
 268 <sup>32 35</sup>) (**online supplemental figure 3**).

269

## 270 Secondary outcome

271 Only four studies evaluated the risk of COPD-related AE or mortality.<sup>16 21 42 43</sup> Definition  
 272 of AE was acute deterioration in clinical presentations according to the recommendation  
 273 in GOLD guideline.<sup>21 42 43</sup> Pooled analysis showed that after adjusting for smoking status,  
 274 PD did not increase the risk of COPD-related AE or mortality (OR 1.18, 95% CI 0.71 to  
 275 1.97, p=0.52, I<sup>2</sup>=36%) (**figure 3**).

276

## 277 DISCUSSION

1  
2  
3  
4  
5 278 This systematic review and meta-analysis identified 22 observational studies to  
6  
7  
8 279 investigate the association between COPD and PD. The results indicated that, after  
9  
10 280 strictly adjusting for confounding by smoking, PD did not increase the risk of COPD, as  
11  
12  
13 281 well as the risk of COPD-related AE or mortality. Moreover, these findings were  
14  
15 282 consistent across the subgroup and stratified analyses.

16  
17  
18 283 To the best of our knowledge, this is the first and largest meta-analysis investigating  
19  
20 284 the association of PD with the risk of COPD and its clinical events, with adequately  
21  
22  
23 285 controlling the confounding effect of smoking. Besides, nearly all included articles were  
24  
25  
26 286 adjusted for age, except the study by Scannapieco *et al.*<sup>14</sup> Prior publications have  
27  
28 287 suggested that PD significantly increased the risk of COPD and COPD-related events.  
29  
30  
31 288 However, the majority of studies have non-negligible flaws, such as only performing  
32  
33  
34 289 univariate analyses, not controlling the confounding by smoking, and using parameters  
35  
36 290 with relatively low specificity for determining PD.<sup>13 25 43</sup> In the present study, to define  
37  
38  
39 291 PD as accurately as possible, we preferentially extracted data concerning the parameters  
40  
41 292 of CAL, ABL and PPD rather than PLI, OHI or remaining teeth. CAL, ABL and PPD  
42  
43  
44 293 are clinical measurements reflecting the destruction of periodontal tissues and  
45  
46 294 momentous parameters for diagnosis of PD.<sup>25 44</sup> Meanwhile, compared with previous  
47  
48  
49 295 meta-analyses, we enrolled more studies, applied more rigorous screening criteria and  
50  
51  
52 296 most importantly, revealed opposite results. In the meta-analyses with incomplete  
53  
54 297 adjustment for smoking, OR value for the risk of COPD ranged from 1.28 to 2.08.<sup>45-48</sup>  
55  
56  
57 298 However, our findings were similar to studies conducted in never smokers,<sup>15 19 20 29 32 35</sup>

1  
2  
3  
4  
5 299 which showed that PD conferred no risk for COPD. Additionally, pooled analyses  
6  
7  
8 300 regarding parameters of CAL, ABL and PPD revealed that PD also did not increase the  
9  
10 301 risk of COPD-related AE or mortality. These findings demonstrate that previously  
11  
12 302 reported correlation between PD and COPD may be results of flawed study design,  
13  
14  
15 303 confounding by smoking and even other factors, such as age and living condition.  
16  
17

18 304 As a momentous inducer for inflammation-related pathological processes, tobacco is  
19  
20 305 known to correlate with a variety of systemic disorders.<sup>49</sup> It is also one of the foremost  
21  
22 306 risk factors for both COPD and PD.<sup>5 10</sup> From the epidemiological perspective, tobacco  
23  
24 307 smoking is a confounder with spuriously inflated effect on the relationship between PD  
25  
26 308 and systemic diseases.<sup>49</sup> To investigate the true association between PD and COPD, it is  
27  
28 309 of great importance to rigorously control the confounding effect of smoking, which  
29  
30 310 means initiating research in never smokers. However, the majority of former studies  
31  
32 311 failed to do that. After a wide search, only six studies focusing on never smokers were  
33  
34 312 found, which unanimously indicated PD was not related with the risk of COPD. We also  
35  
36 313 observed a decreased intensity of the association between both diseases with the increase  
37  
38 314 of control for smoking. Therefore, it could be too early to make a certain conclusion on  
39  
40 315 the COPD-PD relationship. Although interventional studies revealed that periodontal  
41  
42 316 treatment reduced the risk of AE, a number of problems existed, including small sample  
43  
44 317 size, limited study quality and unclear history of smoking or medication during the  
45  
46 318 follow-up.<sup>17 18</sup> For example, compared with control subjects, patients in treatment groups  
47  
48 319 may reduce smoking intentionally, which could spuriously enhance the positive effect  
49  
50  
51  
52  
53  
54  
55  
56  
57  
58  
59  
60

1  
2  
3  
4  
5 320 of periodontal treatment. Consequently, future researches need to take these problems  
6  
7  
8 321 into account.

9  
10 322 It is worth noting that, another possibility that smoking acts as an effect modifier in  
11  
12  
13 323 the COPD-PD relationship should not be ignored. Two observational studies performing  
14  
15 324 stratified analyses concerning smoking status found that the strong correlation of PD  
16  
17  
18 325 with the risk of COPD was restricted to smokers.<sup>15 20</sup> However, this was not revealed in  
19  
20  
21 326 the present study, thus more investigations in smokers and never smokers respectively  
22  
23 327 are required.

24  
25  
26 328 Besides, current evidence has demonstrated several issues to be addressed in future  
27  
28  
29 329 study, comprising inconsistent diagnostic criteria of COPD and PD, the lack of  
30  
31  
32 330 prospective study design and differing adjustments for covariates. These contribute to  
33  
34 331 substantial heterogeneity among studies.<sup>45 46</sup> The present study indicated the  
35  
36  
37 332 heterogeneity was partly explained by study design, diagnostic criteria of COPD and  
38  
39  
40 333 periodontal indexes used to assess PD. Significant association concerning PD and risk  
41  
42  
43 334 of COPD was only identified in subgroups lacking well designs, applying non-GOLD  
44  
45  
46 335 criteria or utilizing ABL as the measure of PD. For one thing, this demonstrated that, as  
47  
48  
49 336 sources of bias, observational study design and nonstandard diagnostic method for  
50  
51  
52 337 COPD could induce apparent deviations, confusing the true relationship between COPD  
53  
54  
55 338 and PD. For another, given undetermined diagnostic criteria for PD, discrepancies  
56  
57  
58 339 between ABL and other indexes cannot fully support the COPD-PD association. Notably,  
59  
60 340 as a radiographic measure, although ABL has been widely considered to reflect

1  
2  
3  
4  
5 341 cumulative effects of periodontal attachment loss over time by chronic inflammation,<sup>28</sup>  
6  
7  
8 342 it does not only exist in PD. Non-periodontal diseases such as liver disorders, cancer and  
9  
10 343 osteoporosis<sup>50</sup> could also result in ABL. As mentioned previously,<sup>28</sup> the observed  
11  
12  
13 344 correlation between ABL and risk of COPD may relate to those non-periodontal diseases.  
14  
15  
16 345

### 17 18 346 **Limitations**

19  
20 347 Several potential limitations should be taken into consideration when interpreting the  
21  
22  
23 348 present results. First, all included studies are observational, which are highly subject to  
24  
25  
26 349 selection bias and confounding by indication. Second, substantial heterogeneity was  
27  
28  
29 350 identified in current study, though we conducted subgroup and stratified analyses to  
30  
31 351 partly explain and reduce it. As stated above, several problems leading to heterogeneity  
32  
33  
34 352 need to be addressed in future researches. Third, the number of studies on risk of COPD-  
35  
36 353 related events was limited, thus the result needs to be carefully understood. Limited  
37  
38  
39 354 number of studies in subgroup and stratified analyses suggested more relevant studies  
40  
41 355 with larger sample size are required. Fourth, although confounding effects of age and  
42  
43  
44 356 smoking were controlled by stratified analysis and statistical adjustment, other potential  
45  
46  
47 357 confounders such as gender, living condition and socioeconomic status<sup>10</sup> could also  
48  
49 358 reduce reliability of the results. Fifth, obvious publication bias was noted in relevant  
50  
51  
52 359 meta-analyses,<sup>45 46</sup> including the present study. For the purpose of rapid review,<sup>23</sup> we  
53  
54  
55 360 only included articles in English. There could exist non-English publications and  
56  
57 361 unpublished evidence, although we searched English-language studies as much as  
58  
59  
60

1  
2  
3  
4  
5 362 possible. Finally, although smoking status and intensity were considered in subgroup  
6  
7 363 analysis, information regarding tobacco content and chemical composition were not  
8  
9 364 collected. This information is difficult to obtain, especially from self-reported smoking,  
10  
11  
12 365 leaving a residual smoking-related bias. Consequently, it is advisable to explore  
13  
14  
15 366 relationship between COPD and PD in never smokers.  
16  
17  
18 367

## 20 368 **CONCLUSION**

23 369 In summary, this systematic review and meta-analysis suggests that PD is not associated  
24  
25 370 with the risk of COPD and COPD-related events after strict adjustment for smoking,  
26  
27 371 although the positive relationship between COPD and PD was previously reported.  
28  
29 372 Large-scale prospective cohort studies with control of potential confounding factors are  
30  
31 373 warranted to validate the present findings.  
32  
33  
34 374

## 38 375 **Abbreviations**

41 376 ABL: Alveolar bone loss; AE: Acute exacerbation; BI: Bleeding index; CAL: Clinical  
42  
43 377 attachment level; CI: Confident interval; COPD: Chronic obstructive pulmonary disease;  
44  
45 378 GB: Gingival bleeding; GOLD: Global Initiative for Chronic Obstructive Lung Diseases;  
46  
47 379 HR: Hazard ratio; OHI: Oral health index; OR: Odds ratio; PD: Periodontal disease; PLI:  
48  
49 380 Plaque index; PPD: Probing pocket depth; RR: Relative risk.  
50  
51  
52 381

56  
57 382 **Contributors** LC and LL designed the study. MY and XL screened and selected relevant  
58  
59  
60



1  
2  
3  
4  
5 383 studies. MY, RP and XL rated the study quality and extracted the data. MY, RP, XL and  
6  
7  
8 384 JP analyzed the data. All authors interpreted the data, and MY, RP, XL, JP drafted the  
9  
10 385 paper. LC and LL critically revised the paper. All authors acknowledged and agreed with  
11  
12  
13 386 the format and content of the paper before submission for publication. LC and LL are  
14  
15 387 the guarantors and responsible for the overall contents of this study.  
16  
17

388

20 389 **Funding** This study was supported in part by grant 2016YFC0901100 from the National  
21  
22  
23 390 Key Research and Development Program of China.  
24  
25

391

28 392 **Competing interests** None declared.  
29  
30

393

33 394 **Patient and public involvement** No patients or other individuals are involved in the  
34  
35  
36 395 design, conduct, reporting or dissemination of this research.  
37  
38

396

41 397 **Patient consent for publication** Not applicable.  
42  
43

398

46 399 **Ethics approval** Not applicable.  
47  
48

400

51 401 **Data availability statement** All data relevant to the study are included in the article or  
52  
53  
54 402 uploaded as supplementary information.  
55  
56

403

404 **ORCID iD**405 Lei Chen <https://orcid.org/0000-0003-3476-0035>

406

407 **REFERENCES**

- 408 1. World Health Organization. The top 10 causes of death, 2020. Available:  
409 <https://www.who.int/news-room/fact-sheets/detail/the-top-10-causes-of-death> (accessed 25  
410 February 2023).
- 411 2. Global Initiative for Chronic Obstructive Lung Disease. Global strategy for the diagnosis,  
412 management and prevention of chronic obstructive pulmonary disease (2023 report).  
413 Available: <https://goldcopd.org/2023-gold-report-2/> (accessed 25 February 2023).
- 414 3. Negewo NA, Gibson PG, McDonald VM. COPD and its comorbidities: Impact,  
415 measurement and mechanisms. *Respirology* 2015;20:1160-1171.
- 416 4. Tan L, Tang X, Pan C, *et al.* Relationship among clinical periodontal, microbiologic  
417 parameters and lung function in participants with chronic obstructive pulmonary disease. *J*  
418 *Periodontol* 2019;90:134-140.
- 419 5. Pihlstrom BL, Michalowicz BS, Johnson NW. Periodontal diseases. *Lancet*  
420 2005;366:1809-1820.
- 421 6. Kassebaum NJ, Bernabé E, Dahiya M, *et al.* Global burden of severe periodontitis in 1990-  
422 2010: a systematic review and meta-regression. *J Dent Res* 2014;93:1045-1053.
- 423 7. Sczepanik FSC, Grossi ML, Casati M, *et al.* Periodontitis is an inflammatory disease of  
424 oxidative stress: We should treat it that way. *Periodontol 2000* 2020;84:45-68.
- 425 8. Usher AK, Stockley RA. The link between chronic periodontitis and COPD: a common  
426 role for the neutrophil? *BMC Med* 2013;11:241.
- 427 9. Dong J, Li W, Wang Q, *et al.* Relationships Between Oral Microecosystem and  
428 Respiratory Diseases. *Front Mol Biosci* 2021;8:718222.
- 429 10. Genco RJ, Borgnakke WS. Risk factors for periodontal disease. *Periodontol 2000*  
430 2013;62:59-94.
- 431 11. Sapey E, Yonel Z, Edgar R, *et al.* The clinical and inflammatory relationships between  
432 periodontitis and chronic obstructive pulmonary disease. *J Clin Periodontol* 2020;47:1040-  
433 1052.
- 434 12. Scannapieco FA. Role of oral bacteria in respiratory infection. *J Periodontol* 1999;70:793-  
435 802.
- 436 13. Kelly N, Winning L, Irwin C, *et al.* Periodontal status and chronic obstructive pulmonary  
437 disease (COPD) exacerbations: a systematic review. *BMC Oral Health* 2021;21:425.
- 438 14. Scannapieco FA, Papandonatos GD, Dunford RG. Associations between oral conditions  
439 and respiratory disease in a national sample survey population. *Ann Periodontol*  
440 1998;3:251-256.
- 441 15. Si Y, Fan H, Song Y, *et al.* Association between periodontitis and chronic obstructive  
442 pulmonary disease in a Chinese population. *J Periodontol* 2012;83:1288-1296.

- 1  
2  
3  
4 443 16. Qian Y, Yuan W, Mei N, *et al.* Periodontitis increases the risk of respiratory disease  
5 444 mortality in older patients. *Exp Gerontol* 2020;133:110878.
- 7 445 17. Zhou X, Han J, Liu Z, *et al.* Effects of periodontal treatment on lung function and  
8 446 exacerbation frequency in patients with chronic obstructive pulmonary disease and chronic  
9 447 periodontitis: a 2-year pilot randomized controlled trial. *J Clin Periodontol* 2014;41:564-  
11 448 572.
- 12 449 18. Kucukcoskun M, Baser U, Oztekin G, *et al.* Initial periodontal treatment for prevention of  
13 450 chronic obstructive pulmonary disease exacerbations. *J Periodontol* 2013;84:863-870.
- 15 451 19. Wang Z, Zhou X, Zhang J, *et al.* Periodontal health, oral health behaviours, and chronic  
16 452 obstructive pulmonary disease. *J Clin Periodontol* 2009;36:750-755.
- 17 453 20. Hyman JJ, Reid BC. Cigarette smoking, periodontal disease: and chronic obstructive  
18 454 pulmonary disease. *J Periodontol* 2004;75:9-15.
- 20 455 21. Barros SP, Suruki R, Loewy ZG, *et al.* A cohort study of the impact of tooth loss and  
21 456 periodontal disease on respiratory events among COPD subjects: modulatory role of  
22 457 systemic biomarkers of inflammation. *PLoS One* 2013;8:e68592.
- 24 458 22. Moher D, Shamseer L, Clarke M, *et al.* Preferred reporting items for systematic review and  
25 459 meta-analysis protocols (PRISMA-P) 2015 statement. *Syst Rev* 2015;4:1.
- 26 460 23. Nussbaumer-Streit B, Klerings I, Dobrescu AI, *et al.* Excluding non-English publications  
27 461 from evidence-syntheses did not change conclusions: a meta-epidemiological study. *J Clin*  
28 462 *Epidemiol* 2020;118:42-54.
- 30 463 24. Wells G, Shea B, O'Connell D, *et al.* The Newcastle-Ottawa Scale (NOS) for assessing the  
31 464 quality of nonrandomised studies in meta-analyses, 2021. Available:  
33 465 [http://www.ohri.ca/programs/clinical\\_epidemiology/oxford.asp](http://www.ohri.ca/programs/clinical_epidemiology/oxford.asp) (accessed 25 February  
34 466 2023).
- 35 467 25. Kinane DF, Stathopoulou PG, Papapanou PN. Periodontal diseases. *Nat Rev Dis Primers*  
36 468 2017;3:17038.
- 38 469 26. Farook FF, Alodwene H, Alharbi R, *et al.* Reliability assessment between clinical  
39 470 attachment loss and alveolar bone level in dental radiographs. *Clin Exp Dent Res*  
40 471 2020;6:596-601.
- 42 472 27. Lin L. Bias caused by sampling error in meta-analysis with small sample sizes. *PLoS One*  
43 473 2018;13:e0204056.
- 44 474 28. Hayes C, Sparrow D, Cohen M, *et al.* The association between alveolar bone loss and  
45 475 pulmonary function: the VA Dental Longitudinal Study. *Ann Periodontol* 1998;3:257-261.
- 47 476 29. Garcia RI, Nunn ME, Vokonas PS. Epidemiologic associations between periodontal  
48 477 disease and chronic obstructive pulmonary disease. *Ann Periodontol* 2001;6:71-77.
- 50 478 30. Scannapieco FA, Ho AW. Potential associations between chronic respiratory disease and  
51 479 periodontal disease: analysis of National Health and Nutrition Examination Survey III. *J*  
52 480 *Periodontol* 2001;72:50-56.
- 54 481 31. Leuckfeld I, Obregon-Whittle MV, Lund MB, *et al.* Severe chronic obstructive pulmonary  
55 482 disease: association with marginal bone loss in periodontitis. *Respir Med* 2008;102:488-  
56 483 494.
- 57 484 32. Zhou X, Han J, Song Y, *et al.* Serum levels of 25-hydroxyvitamin D, oral health and  
58 485 chronic obstructive pulmonary disease. *J Clin Periodontol* 2012;39:350-356.

- 1  
2  
3  
4 486 33. Ledić K, Marinković S, Puhar I, *et al.* Periodontal disease increases risk for chronic  
5 487 obstructive pulmonary disease. *Coll Antropol* 2013;37:937-942.
- 7 488 34. Chung JH, Hwang HJ, Kim SH, *et al.* Associations Between Periodontitis and Chronic  
8 489 Obstructive Pulmonary Disease: The 2010 to 2012 Korean National Health and Nutrition  
9 490 Examination Survey. *J Periodontol* 2016;87:864-871.
- 11 491 35. Harland J, Furuta M, Takeuchi K, *et al.* Periodontitis modifies the association between  
12 492 smoking and chronic obstructive pulmonary disease in Japanese men. *J Oral Sci*  
13 493 2018;60:226-231.
- 15 494 36. Lopez-de-Andrés A, Vazquez-Vazquez L, Martinez-Huedo MA, *et al.* Is COPD associated  
16 495 with periodontal disease? A population-based study in Spain. *Int J Chron Obstruct Pulmon*  
17 496 *Dis* 2018;13:3435-3445.
- 19 497 37. Takeuchi K, Matsumoto K, Furuta M, *et al.* Periodontitis Is Associated with Chronic  
20 498 Obstructive Pulmonary Disease. *J Dent Res* 2019;98:534-540.
- 22 499 38. Jung ES, Lee KH, Choi YY. Association between oral health status and chronic obstructive  
23 500 pulmonary disease in Korean adults. *Int Dent J* 2020;70:208-213.
- 24 501 39. Winning L, Polyzois I, Sanmartin Berglund J, *et al.* Periodontitis and airflow limitation in  
25 502 older Swedish individuals. *J Clin Periodontol* 2020;47:715-725.
- 27 503 40. Zhou X, Wang J, Liu W, *et al.* Periodontal Status and Microbiologic Pathogens in Patients  
28 504 with Chronic Obstructive Pulmonary Disease and Periodontitis: A Case-Control Study. *Int*  
29 505 *J Chron Obstruct Pulmon Dis* 2020;15:2071-2079.
- 31 506 41. Kataoka S, Kimura M, Yamaguchi T, *et al.* A cross-sectional study of relationships  
32 507 between periodontal disease and general health: The Hitachi Oral Healthcare Survey. *BMC*  
33 508 *Oral Health* 2021;21:644.
- 35 509 42. Liu Z, Zhang W, Zhang J, *et al.* Oral hygiene, periodontal health and chronic obstructive  
36 510 pulmonary disease exacerbations. *J Clin Periodontol* 2012;39:45-52.
- 38 511 43. Abdelhalim H, Aboelnaga H, Aggour R. Chronic obstructive pulmonary disease  
39 512 exacerbations and periodontitis: a possible association. *Egyptian Journal of Bronchology*  
40 513 2018;12.
- 42 514 44. Papapanou PN, Sanz M, Buduneli N, *et al.* Periodontitis: Consensus report of workgroup 2  
43 515 of the 2017 World Workshop on the Classification of Periodontal and Peri-Implant  
44 516 Diseases and Conditions. *J Clin Periodontol* 2018;45 Suppl 20:S162-s170.
- 46 517 45. Zeng XT, Tu ML, Liu DY, *et al.* Periodontal disease and risk of chronic obstructive  
47 518 pulmonary disease: a meta-analysis of observational studies. *PLoS One* 2012;7:e46508.
- 49 519 46. Gomes-Filho IS, Cruz SSD, Trindade SC, *et al.* Periodontitis and respiratory diseases: A  
50 520 systematic review with meta-analysis. *Oral Dis* 2020;26:439-446.
- 52 521 47. Wu Z, Xiao C, Chen F, *et al.* Pulmonary disease and periodontal health: a meta-analysis.  
53 522 *Sleep Breath* 2022.
- 55 523 48. Molina A, Huck O, Herrera D, *et al.* The association between respiratory diseases and  
54 524 periodontitis: A systematic review and meta-analysis. *J Clin Periodontol* 2023.
- 56 525 49. Hujjoel PP, Drangsholt M, Spiekerman C, *et al.* Periodontitis-systemic disease associations  
57 526 in the presence of smoking--causal or coincidental? *Periodontol 2000* 2002;30:51-60.
- 59 527 50. Intini G, Katsuragi Y, Kirkwood KL, *et al.* Alveolar bone loss: mechanisms, potential  
60 528 therapeutic targets, and interventions. *Adv Dent Res* 2014;26:38-46.

1  
2  
3  
4  
5 529  
6  
7

8 530  
9

10 531  
11  
12

13 532  
14

15 533  
16  
17

18 534  
19

20 535  
21  
22

23 536  
24  
25

26 537  
27  
28

29 538  
30  
31

32 539  
33  
34

35 540  
36  
37

38 541  
39  
40

41 542  
42  
43

44 543  
45  
46

47 544  
48  
49

50 545  
51  
52

53 546  
54  
55

56  
57  
58  
59  
60

547 **Figure legends**

548 **Figure 1** PRISMA flow diagram of study selection.

549 **Figure 2** Forest plot of the risk of COPD by periodontal disease, subgroup analysis based

1  
2  
3  
4  
5 550 on adjusted by smoking status and intensity versus by smoking status only. Values more  
6  
7  
8 551 than one indicate a higher risk in patients with periodontal disease.  
9  
10 552 **Figure 3** Forest plot of the risk of COPD-related events by periodontal disease. Values  
11  
12  
13 553 more than one indicate a higher risk in patients with periodontal disease.  
14  
15  
16  
17  
18  
19  
20  
21  
22  
23  
24  
25  
26  
27  
28  
29  
30  
31  
32  
33  
34  
35  
36  
37  
38  
39  
40  
41  
42  
43  
44  
45  
46  
47  
48  
49  
50  
51  
52  
53  
54  
55  
56  
57  
58  
59  
60

For peer review only



Figure 1 PRISMA flow diagram of study selection.

215x279mm (200 x 200 DPI)



Figure 2 Forest plot of the risk of COPD by periodontal disease, subgroup analysis based on adjusted by smoking status and intensity versus by smoking status only. Values more than one indicate a higher risk in patients with periodontal disease.

536x384mm (118 x 118 DPI)



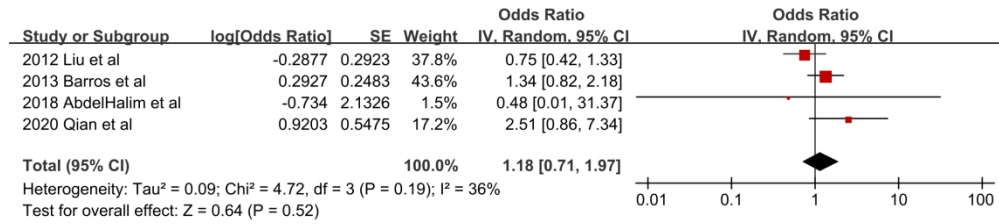

Figure 3 Forest plot of the risk of COPD-related events by periodontal disease. Values more than one indicate a higher risk in patients with periodontal disease.

497x118mm (118 x 118 DPI)

**Table 1** Search strategy**Search term**

1. (Oral health) OR (periodontal disease) OR (periodontal health) OR (periodontitis)  
OR (clinical attachment level) OR (alveolar bone loss) OR (probing depth)
2. (Respiratory disease) OR (chronic obstructive pulmonary disease) OR (pulmonary  
function) OR (airflow limitation)
3. 1 AND 2

For peer review only

**Table 2** Adjustment for confounders of included studies

| Study Author                               | Covariates in logistic regression multivariable model                                                                                                      |
|--------------------------------------------|------------------------------------------------------------------------------------------------------------------------------------------------------------|
| Hayes <i>et al</i> <sup>1</sup>            | Age, smoking, education, height                                                                                                                            |
| Scannapieco <i>et al</i> <sup>2</sup>      | Smoking                                                                                                                                                    |
| Garcia <i>et al</i> <sup>3</sup>           | Age, height, alcohol, education ( <b>with stratified analysis on smoking</b> )                                                                             |
| Leuckfeld <i>et al</i> <sup>4</sup>        | Age, female gender, <b>pack years of smoking</b>                                                                                                           |
| Liu <i>et al</i> <sup>5</sup>              | Age, gender, BMI and smoking                                                                                                                               |
| Wang <i>et al</i> <sup>6</sup>             | Age, gender, BMI ( <b>with stratified analysis on smoking</b> )                                                                                            |
| Si <i>et al</i> <sup>7</sup>               | Age, gender, occupation, educational level ( <b>with stratified analysis on smoking</b> )                                                                  |
| Zhou <i>et al</i> <sup>8</sup>             | Age, gender, smoking, BMI, season ( <b>with stratified analysis on smoking</b> )                                                                           |
| Ledić <i>et al</i> <sup>9</sup>            | Age, gender, <b>pack years of smoking</b> , BMI                                                                                                            |
| Lopez-de-Andrés <i>et al</i> <sup>10</sup> | Age, gender, smoking, educational level, DM, obesity                                                                                                       |
| Zhou <i>et al</i> <sup>11</sup>            | Age, gender, smoking, BMI                                                                                                                                  |
| Kataoka <i>et al</i> <sup>12</sup>         | Age, smoking                                                                                                                                               |
| Qian <i>et al</i> <sup>13</sup>            | Age, sex, education levels, BMI, smoking, drinking, hypertension, DM                                                                                       |
| Barros <i>et al</i> <sup>14</sup>          | Age, gender, Race, BMI, education, <b>pack years of smoking</b> , hypertension                                                                             |
| Scannapieco <i>et al</i> <sup>15</sup>     | Age, gender, <b>pack years of smoking</b> , Race, education, income, dental visits, alcohol, DM                                                            |
| Hyman <i>et al</i> <sup>16</sup>           | Age, gender, Race, history of hypertension and heart attack, dental visit within 1 year, BMI, family income ( <b>with stratified analysis on smoking</b> ) |
| Chung <i>et al</i> <sup>17</sup>           | Age, smoking, family income, education, alcohol, exercise, BMI, tooth brushing frequency, DM, number of natural teeth                                      |
| Harland <i>et al</i> <sup>18</sup>         | Age, number of present teeth, BMI, alcohol consumption, occupation, hypertension, DM ( <b>with stratified analysis on smoking</b> )                        |
| Takeuchi <i>et al</i> <sup>19</sup>        | Age, gender, <b>pack years of smoking</b> , occupation, DM, BMI, physical                                                                                  |

---

|                                       |                                                                                                                                                                                                                               |
|---------------------------------------|-------------------------------------------------------------------------------------------------------------------------------------------------------------------------------------------------------------------------------|
|                                       | activity, alcohol intake, number of present teeth                                                                                                                                                                             |
| Jung <i>et al</i> <sup>20</sup>       | Age, gender, smoking, educational level, household income, alcohol consumption, periodontal status, number of missing teeth, oral health factors                                                                              |
| Winning <i>et al</i> <sup>21</sup>    | Age, gender, smoking, height, BMI, exercise, DM, hypertension, MI, education level, living condition                                                                                                                          |
| AbdelHalim <i>et al</i> <sup>22</sup> | Age, BMI, low-level of education, <b>pack years of smoking</b> , MRC, CAT, hospitalizations, COPD category (C-D), FVC (% predicted), FEV1 (% predicted), FEV1 / FVC (% predicted), MMEF (% predicted), PEF (% predicted), CRP |

---

BMI, body mass index; CAT, chronic obstructive pulmonary disease assessment test; CRP, C-reactive protein; DM, diabetes mellitus; FEV1, forced expiratory volume in 1 second; FVC, forced vital capacity; MI, myocardial infarction; MMEF, maximum mid-expiratory flow; MRC, Medical Research Council; PEF, peak expiratory flow.

**Bold:** the covariate of smoking intensity (duration and dose) or stratified analyses on smoking status.

**Table 3** Quality assessment based on the Newcastle-Ottawa Scale

**(A) Cohort study**

| Study Author                        | Selection      |                   |                           |                     | Comparability | Outcome               |                     |                       | Total score |
|-------------------------------------|----------------|-------------------|---------------------------|---------------------|---------------|-----------------------|---------------------|-----------------------|-------------|
|                                     | Exposed cohort | Nonexposed cohort | Ascertainment of exposure | Outcome of interest |               | Assessment of outcome | Length of follow-up | Adequacy of follow-up |             |
| Barros <i>et al</i> <sup>14</sup>   | *              | *                 | *                         | ...                 | ...           | *                     | *                   | *                     | 6           |
| Takeuchi <i>et al</i> <sup>19</sup> | *              | *                 | *                         | *                   | ...           | *                     | *                   | *                     | 7           |
| Qian <i>et al</i> <sup>13</sup>     | ...            | *                 | *                         | ...                 | ...           | *                     | *                   | ...                   | 4           |

**(B) Case-control / cross-sectional study**

| Study Author                               | Selection       |                                 |                   |                    | Comparability | Outcome                   |                                                     |                   | Total score |
|--------------------------------------------|-----------------|---------------------------------|-------------------|--------------------|---------------|---------------------------|-----------------------------------------------------|-------------------|-------------|
|                                            | Case definition | Representativeness of the cases | Control selection | Control definition |               | Ascertainment of exposure | Same method of ascertainment for cases and controls | Non-response rate |             |
| Hayes <i>et al</i> <sup>1</sup>            | *               | ...                             | *                 | *                  | *             | *                         | *                                                   | *                 | 7           |
| Scannapieco <i>et al</i> <sup>2</sup>      | ...             | *                               | *                 | *                  | ...           | *                         | *                                                   | ...               | 5           |
| Garcia <i>et al</i> <sup>3</sup>           | *               | ...                             | *                 | *                  | *             | *                         | *                                                   | *                 | 7           |
| Scannapieco <i>et al</i> <sup>15</sup>     | ...             | *                               | *                 | *                  | ...           | *                         | *                                                   | *                 | 6           |
| Hyman <i>et al</i> <sup>16</sup>           | *               | *                               | *                 | *                  | ...           | *                         | *                                                   | *                 | 7           |
| Leuckfeld <i>et al</i> <sup>4</sup>        | *               | ...                             | ...               | *                  | ...           | *                         | *                                                   | *                 | 5           |
| Wang <i>et al</i> <sup>6</sup>             | *               | *                               | ...               | *                  | *             | *                         | *                                                   | *                 | 7           |
| Liu <i>et al</i> <sup>5</sup>              | *               | *                               | ...               | *                  | *             | *                         | *                                                   | *                 | 7           |
| Si <i>et al</i> <sup>7</sup>               | *               | *                               | ...               | *                  | *             | *                         | *                                                   | *                 | 7           |
| Zhou <i>et al</i> <sup>8</sup>             | *               | *                               | ...               | *                  | *             | *                         | *                                                   | *                 | 7           |
| Ledić <i>et al</i> <sup>9</sup>            | *               | *                               | ...               | *                  | *             | *                         | *                                                   | *                 | 7           |
| Chung <i>et al</i> <sup>17</sup>           | *               | *                               | *                 | *                  | ...           | *                         | *                                                   | *                 | 7           |
| AbdelHalim <i>et al</i> <sup>22</sup>      | *               | ...                             | ...               | *                  | ...           | *                         | *                                                   | *                 | 5           |
| Harland <i>et al</i> <sup>18</sup>         | *               | *                               | ...               | *                  | ...           | *                         | *                                                   | *                 | 6           |
| Lopez-de-Andrés <i>et al</i> <sup>10</sup> | ...             | *                               | *                 | *                  | *             | ...                       | *                                                   | *                 | 6           |
| Jung <i>et al</i> <sup>20</sup>            | ...             | *                               | *                 | *                  | ...           | *                         | *                                                   | *                 | 6           |
| Winning <i>et al</i> <sup>21</sup>         | *               | *                               | *                 | *                  | ...           | *                         | *                                                   | *                 | 7           |
| Zhou <i>et al</i> <sup>11</sup>            | *               | *                               | ...               | ...                | **            | *                         | *                                                   | *                 | 7           |
| Kataoka <i>et al</i> <sup>12</sup>         | *               | *                               | *                 | *                  | ...           | *                         | *                                                   | *                 | 7           |

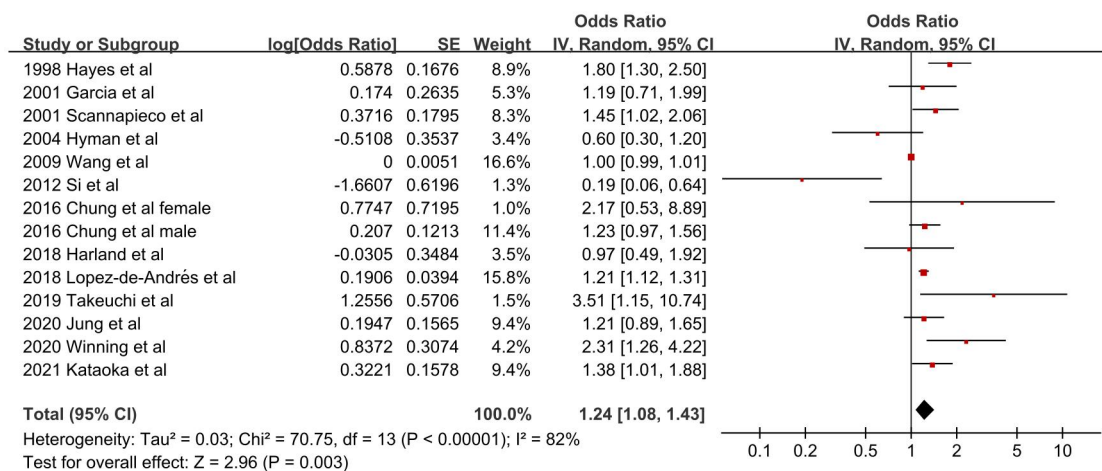

**Figure 1** Sensitivity analysis on studies with larger sample size ( $N \geq 500$ ). Values more than one indicate a higher risk of COPD in patients with PD.

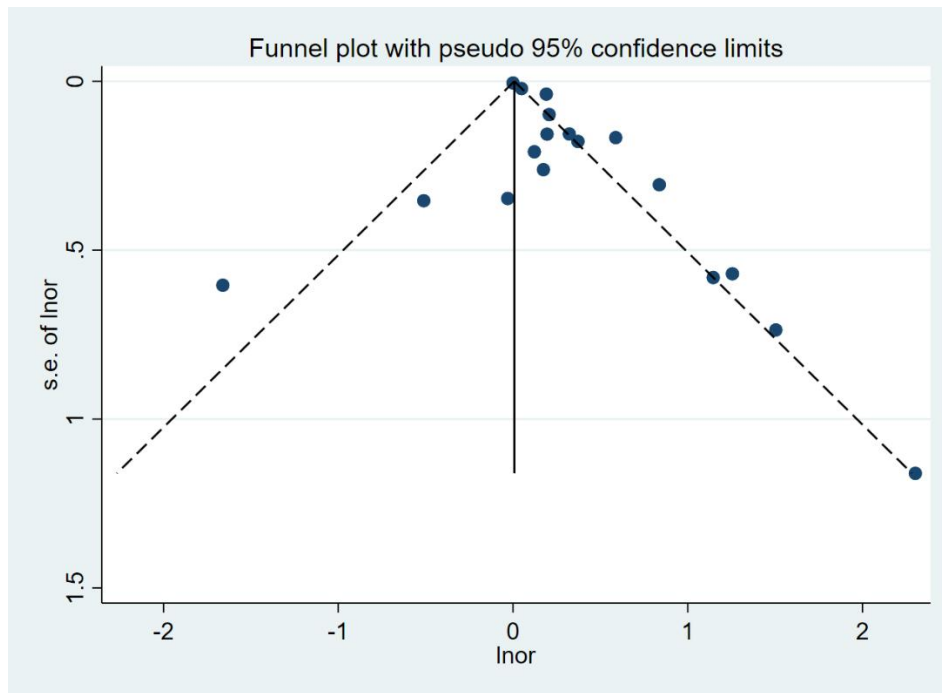

26 **Figure 2** Funnel plot for the risk of COPD, with pseudo 95% confidence limits.

27  
28  
29  
30  
31  
32  
33  
34  
35  
36  
37  
38  
39  
40  
41  
42  
43  
44  
45  
46  
47  
48  
49  
50  
51  
52  
53  
54  
55  
56  
57  
58  
59  
60

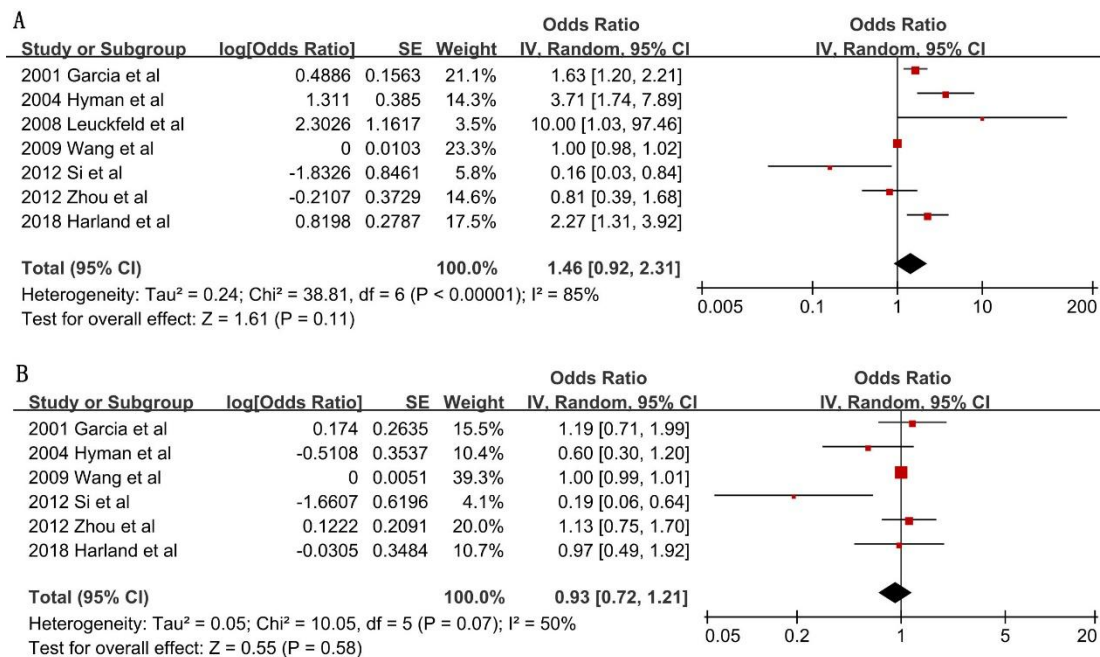

**Figure 3** Forest plot of the risk of COPD by periodontal disease. **A** in smokers and **B** in never smokers. Values more than one indicate a higher risk in patients with periodontal disease.



## References

1. Hayes C, Sparrow D, Cohen M, *et al.* The association between alveolar bone loss and pulmonary function: the VA Dental Longitudinal Study. *Ann Periodontol* 1998;3:257-261.
2. Scannapieco FA, Papandonatos GD, Dunford RG. Associations between oral conditions and respiratory disease in a national sample survey population. *Ann Periodontol* 1998;3:251-256.
3. Garcia RI, Nunn ME, Vokonas PS. Epidemiologic associations between periodontal disease and chronic obstructive pulmonary disease. *Ann Periodontol* 2001;6:71-77.
4. Leuckfeld I, Obregon-Whittle MV, Lund MB, *et al.* Severe chronic obstructive pulmonary disease: association with marginal bone loss in periodontitis. *Respir Med* 2008;102:488-494.
5. Liu Z, Zhang W, Zhang J, *et al.* Oral hygiene, periodontal health and chronic obstructive pulmonary disease exacerbations. *J Clin Periodontol* 2012;39:45-52.
6. Wang Z, Zhou X, Zhang J, *et al.* Periodontal health, oral health behaviours, and chronic obstructive pulmonary disease. *J Clin Periodontol* 2009;36:750-755.
7. Si Y, Fan H, Song Y, *et al.* Association between periodontitis and chronic obstructive pulmonary disease in a Chinese population. *J Periodontol* 2012;83:1288-1296.
8. Zhou X, Han J, Song Y, *et al.* Serum levels of 25-hydroxyvitamin D, oral health and chronic obstructive pulmonary disease. *J Clin Periodontol* 2012;39:350-356.
9. Ledić K, Marinković S, Puhar I, *et al.* Periodontal disease increases risk for chronic obstructive pulmonary disease. *Coll Antropol* 2013;37:937-942.
10. Lopez-de-Andrés A, Vazquez-Vazquez L, Martinez-Huedo MA, *et al.* Is COPD associated with periodontal disease? A population-based study in Spain. *Int J Chron Obstruct Pulmon Dis* 2018;13:3435-3445.
11. Zhou X, Wang J, Liu W, *et al.* Periodontal Status and Microbiologic Pathogens in Patients with Chronic Obstructive Pulmonary Disease and Periodontitis: A Case-Control Study. *Int J Chron Obstruct Pulmon Dis* 2020;15:2071-2079.
12. Kataoka S, Kimura M, Yamaguchi T, *et al.* A cross-sectional study of relationships between periodontal disease and general health: The Hitachi Oral Healthcare Survey. *BMC Oral Health* 2021;21:644.
13. Qian Y, Yuan W, Mei N, *et al.* Periodontitis increases the risk of respiratory disease mortality in older patients. *Exp Gerontol* 2020;133:110878.
14. Barros SP, Suruki R, Loewy ZG, *et al.* A cohort study of the impact of tooth loss and periodontal disease on respiratory events among COPD subjects: modulatory role of systemic biomarkers of inflammation. *PLoS One* 2013;8:e68592.
15. Scannapieco FA, Ho AW. Potential associations between chronic respiratory disease and periodontal disease: analysis of National Health and Nutrition Examination Survey III. *J Periodontol* 2001;72:50-56.
16. Hyman JJ, Reid BC. Cigarette smoking, periodontal disease: and chronic obstructive pulmonary disease. *J Periodontol* 2004;75:9-15.
17. Chung JH, Hwang HJ, Kim SH, *et al.* Associations Between Periodontitis and Chronic Obstructive Pulmonary Disease: The 2010 to 2012 Korean National Health and Nutrition Examination Survey. *J Periodontol* 2016;87:864-871.

- 1
  - 2
  - 3
  - 4
  - 5
  - 6
  - 7
  - 8
  - 9
  - 10
  - 11
  - 12
  - 13
  - 14
  - 15
  - 16
  - 17
  - 18
  - 19
  - 20
  - 21
  - 22
  - 23
  - 24
  - 25
  - 26
  - 27
  - 28
  - 29
  - 30
  - 31
  - 32
  - 33
  - 34
  - 35
  - 36
  - 37
  - 38
  - 39
  - 40
  - 41
  - 42
  - 43
  - 44
  - 45
  - 46
  - 47
  - 48
  - 49
  - 50
  - 51
  - 52
  - 53
  - 54
  - 55
  - 56
  - 57
  - 58
  - 59
  - 60
18. Harland J, Furuta M, Takeuchi K, *et al.* Periodontitis modifies the association between smoking and chronic obstructive pulmonary disease in Japanese men. *J Oral Sci* 2018;60:226-231.
19. Takeuchi K, Matsumoto K, Furuta M, *et al.* Periodontitis Is Associated with Chronic Obstructive Pulmonary Disease. *J Dent Res* 2019;98:534-540.
20. Jung ES, Lee KH, Choi YY. Association between oral health status and chronic obstructive pulmonary disease in Korean adults. *Int Dent J* 2020;70:208-213.
21. Winning L, Polyzois I, Sanmartin Berglund J, *et al.* Periodontitis and airflow limitation in older Swedish individuals. *J Clin Periodontol* 2020;47:715-725.
22. Abdelhalim H, Aboelnaga H, Aggour R. Chronic obstructive pulmonary disease exacerbations and periodontitis: a possible association. *Egyptian Journal of Bronchology* 2018;12.



## PRISMA 2009 Checklist

| Section/topic             | Item No | Checklist item                                                                                                                                                                                                                                                                                              | Reported on Page Number/Line Number | Reported on Section/Paragraph                 |
|---------------------------|---------|-------------------------------------------------------------------------------------------------------------------------------------------------------------------------------------------------------------------------------------------------------------------------------------------------------------|-------------------------------------|-----------------------------------------------|
| <b>TITLE</b>              |         |                                                                                                                                                                                                                                                                                                             |                                     |                                               |
| Title                     | 1       | Identify the report as a systematic review, meta-analysis, or both.                                                                                                                                                                                                                                         | Page 1 / Line 2,3                   | Title page                                    |
| <b>ABSTRACT</b>           |         |                                                                                                                                                                                                                                                                                                             |                                     |                                               |
| Structured summary        | 2       | Provide a structured summary including, as applicable: background; objectives; data sources; study eligibility criteria, participants, and interventions; study appraisal and synthesis methods; results; limitations; conclusions and implications of key findings; systematic review registration number. | Page 2,3 / Line 28-52               | Abstract                                      |
| <b>INTRODUCTION</b>       |         |                                                                                                                                                                                                                                                                                                             |                                     |                                               |
| Rationale                 | 3       | Describe the rationale for the review in the context of what is already known.                                                                                                                                                                                                                              | Page 4,5 / Line 69-103              | Introduction / Paragraph 1-4                  |
| Objectives                | 4       | Provide an explicit statement of questions being addressed with reference to participants, interventions, comparisons, outcomes, and study design (PICOS).                                                                                                                                                  | Page 5 / Line 103-107               | Introduction / Paragraph 4                    |
| <b>METHODS</b>            |         |                                                                                                                                                                                                                                                                                                             |                                     |                                               |
| Protocol and registration | 5       | Indicate if a review protocol exists, if and where it can be accessed (e.g., Web address), and, if available, provide registration information including registration number.                                                                                                                               | Page 5,6 / Line 110-112             | Methods / Paragraph 1                         |
| Eligibility criteria      | 6       | Specify study characteristics (e.g., PICOS, length of follow-up) and report characteristics (e.g., years considered, language, publication status) used as criteria for eligibility, giving rationale.                                                                                                      | Page 6 / Line 118-124               | Methods / Paragraph 2                         |
| Information sources       | 7       | Describe all information sources (e.g., databases with dates of coverage, contact with study authors to identify additional studies) in the search and date last searched.                                                                                                                                  | Page 6 / Line 115,116               | Methods / Paragraph 2                         |
| Search                    | 8       | Present full electronic search strategy for at least one database, including any limits used, such that it could be repeated.                                                                                                                                                                               | Page 6 / Line 116-118               | Methods / Paragraph 2<br>Supplemental table 1 |
| Study selection           | 9       | State the process for selecting studies (i.e., screening, eligibility, included in systematic review, and, if applicable, included in the meta-analysis).                                                                                                                                                   | Page 6 / Line 125-131               | Methods / Paragraph 3                         |
| Data collection process   | 10      | Describe method of data extraction from reports (e.g., piloted forms, independently, in duplicate) and any processes for obtaining and confirming data from investigators.                                                                                                                                  | Page 7 / Line 134,135               | Methods / Paragraph 4                         |
| Data items                | 11      | List and define all variables for which data were sought (e.g., PICOS, funding sources) and any assumptions and simplifications made.                                                                                                                                                                       | Page 7 / Line 135-140               | Methods / Paragraph 4                         |

|                                    |    |                                                                                                                                                                                                                        |                                                      |                                              |
|------------------------------------|----|------------------------------------------------------------------------------------------------------------------------------------------------------------------------------------------------------------------------|------------------------------------------------------|----------------------------------------------|
| Risk of bias in individual studies | 12 | Describe methods used for assessing risk of bias of individual studies (including specification of whether this was done at the study or outcome level), and how this information is to be used in any data synthesis. | Page 7 / Line 142-147                                | Methods / Paragraph 4                        |
| Summary measures                   | 13 | State the principal summary measures (e.g., risk ratio, difference in means).                                                                                                                                          | Page 7 / Line 150                                    | Methods / Paragraph 5                        |
| Synthesis of results               | 14 | Describe the methods of handling data and combining results of studies, if done, including measures of consistency (e.g., I <sup>2</sup> ) for each meta-analysis.                                                     | Page 8 / Line 156-160                                | Methods / Paragraph 5                        |
| Risk of bias across studies        | 15 | Specify any assessment of risk of bias that may affect the cumulative evidence (e.g., publication bias, selective reporting within studies).                                                                           | Page 8 / Line 171-173                                | Methods / Paragraph 7                        |
| Additional analyses                | 16 | Describe methods of additional analyses (e.g., sensitivity or subgroup analyses, meta-regression), if done, indicating which were pre-specified.                                                                       | Page 8 / Line 161-172                                | Methods / Paragraph 6,7                      |
| <b>RESULTS</b>                     |    |                                                                                                                                                                                                                        |                                                      |                                              |
| Study selection                    | 17 | Give numbers of studies screened, assessed for eligibility, and included in the review, with reasons for exclusions at each stage, ideally with a flow diagram.                                                        | Page 9 / Line 182-189                                | Results / Paragraph 1; Figure 1              |
| Study characteristics              | 18 | For each study, present characteristics for which data were extracted (e.g., study size, PICOS, follow-up period) and provide the citations.                                                                           | Page 9-12 / Line 190-224                             | Results / Paragraph 2-4; Table 1             |
| Risk of bias within studies        | 19 | Present data on risk of bias of each study and, if available, any outcome level assessment (see item 12).                                                                                                              | Page 12 / Line 226-232                               | Results / Paragraph 5; Supplemental table 3  |
| Results of individual studies      | 20 | For all outcomes considered (benefits or harms), present, for each study: (a) simple summary data for each intervention group (b) effect estimates and confidence intervals, ideally with a forest plot.               | Page 12,13 / Line 234-244                            | Results / Paragraph 6; Figure 2 and 3        |
| Synthesis of results               | 21 | Present results of each meta-analysis done, including confidence intervals and measures of consistency.                                                                                                                | Page 12 / Line 235-237<br>Page 15 / Line 273-275     | Results / Paragraph 6,8; Figure 2 and 3      |
| Risk of bias across studies        | 22 | Present results of any assessment of risk of bias across studies (see Item 15).                                                                                                                                        | Page 12,13 / Line 238-239;<br>242-244                | Results / Paragraph 6; Supplemental figure 2 |
| Additional analysis                | 23 | Give results of additional analyses, if done (e.g., sensitivity or subgroup analyses, meta-regression [see Item 16]).                                                                                                  | Page 12 / Line 239-241;<br>Page 13-15 / Line 245-268 | Results / Paragraph 6-8; Table 2, Figure 2   |
| <b>DISCUSSION</b>                  |    |                                                                                                                                                                                                                        |                                                      |                                              |
| Summary of evidence                | 24 | Summarize the main findings including the strength of evidence for each main outcome; consider their relevance to key groups (e.g., healthcare providers, users, and policy makers).                                   | Page 15-18 / Line 278-344                            | Discussion / Paragraph 1-5                   |
| Limitations                        | 25 | Discuss limitations at study and outcome level (e.g., risk of bias), and at review-level (e.g., incomplete retrieval of identified research, reporting bias).                                                          | Page 18,19 / Line 346-366                            | Discussion / Paragraph 6                     |
| Conclusions                        | 26 | Provide a general interpretation of the results in the context of other evidence, and implications for future research.                                                                                                | Page 19 / Line 368-373                               | Conclusion / Paragraph 1                     |

| FUNDING |    |                                                                                                                                            |                        |         |
|---------|----|--------------------------------------------------------------------------------------------------------------------------------------------|------------------------|---------|
| Funding | 27 | Describe sources of funding for the systematic review and other support (e.g., supply of data); role of funders for the systematic review. | Page 20 / Line 389,390 | Funding |

**From:** Moher D, Liberati A, Tetzlaff J, Altman DG, The PRISMA Group (2009). Preferred Reporting Items for Systematic Reviews and Meta-Analyses: The PRISMA Statement. PLoS Med 6(7): e1000097. doi:10.1371/journal.pmed1000097

For more information, visit: [www.prisma-statement.org](http://www.prisma-statement.org).

Please leave this space alone as it will be supplemented by the editorial office when needed.

For peer review only

# BMJ Open

## The association between chronic obstructive pulmonary disease and periodontal disease: a systematic review and meta-analysis

|                                 |                                                                                                                                                                                                                                                                                                                                                                                                                                                                                                                                                                                                                                                                                               |
|---------------------------------|-----------------------------------------------------------------------------------------------------------------------------------------------------------------------------------------------------------------------------------------------------------------------------------------------------------------------------------------------------------------------------------------------------------------------------------------------------------------------------------------------------------------------------------------------------------------------------------------------------------------------------------------------------------------------------------------------|
| Journal:                        | <i>BMJ Open</i>                                                                                                                                                                                                                                                                                                                                                                                                                                                                                                                                                                                                                                                                               |
| Manuscript ID                   | bmjopen-2022-067432.R3                                                                                                                                                                                                                                                                                                                                                                                                                                                                                                                                                                                                                                                                        |
| Article Type:                   | Original research                                                                                                                                                                                                                                                                                                                                                                                                                                                                                                                                                                                                                                                                             |
| Date Submitted by the Author:   | 02-Jun-2023                                                                                                                                                                                                                                                                                                                                                                                                                                                                                                                                                                                                                                                                                   |
| Complete List of Authors:       | Yang, Mei; Sichuan University West China Hospital, Department of Pulmonary and Critical Care Medicine<br>Peng, Ran; Sichuan University West China Hospital, Department of Pulmonary and Critical Care Medicine; 363 Hospital, Department of Pulmonary and Critical Care Medicine<br>Li, Xiaoou; Sichuan University West China Hospital, Department of Pulmonary and Critical Care Medicine<br>Peng, Junjie; Sichuan University West China Hospital, Department of Pulmonary and Critical Care Medicine<br>Liu, Lin; 363 Hospital, Department of Pulmonary and Critical Care Medicine<br>Chen, Lei; Sichuan University West China Hospital, Department of Pulmonary and Critical Care Medicine |
| <b>Primary Subject Heading</b>: | Respiratory medicine                                                                                                                                                                                                                                                                                                                                                                                                                                                                                                                                                                                                                                                                          |
| Secondary Subject Heading:      | Public health, Smoking and tobacco, Dentistry and oral medicine                                                                                                                                                                                                                                                                                                                                                                                                                                                                                                                                                                                                                               |
| Keywords:                       | Chronic airways disease < THORACIC MEDICINE, RESPIRATORY MEDICINE (see Thoracic Medicine), ORAL MEDICINE, Emphysema < THORACIC MEDICINE                                                                                                                                                                                                                                                                                                                                                                                                                                                                                                                                                       |
|                                 |                                                                                                                                                                                                                                                                                                                                                                                                                                                                                                                                                                                                                                                                                               |

SCHOLARONE™  
Manuscripts



I, the Submitting Author has the right to grant and does grant on behalf of all authors of the Work (as defined in the below author licence), an exclusive licence and/or a non-exclusive licence for contributions from authors who are: i) UK Crown employees; ii) where BMJ has agreed a CC-BY licence shall apply, and/or iii) in accordance with the terms applicable for US Federal Government officers or employees acting as part of their official duties; on a worldwide, perpetual, irrevocable, royalty-free basis to BMJ Publishing Group Ltd ("BMJ") its licensees and where the relevant Journal is co-owned by BMJ to the co-owners of the Journal, to publish the Work in this journal and any other BMJ products and to exploit all rights, as set out in our [licence](#).

The Submitting Author accepts and understands that any supply made under these terms is made by BMJ to the Submitting Author unless you are acting as an employee on behalf of your employer or a postgraduate student of an affiliated institution which is paying any applicable article publishing charge ("APC") for Open Access articles. Where the Submitting Author wishes to make the Work available on an Open Access basis (and intends to pay the relevant APC), the terms of reuse of such Open Access shall be governed by a Creative Commons licence – details of these licences and which [Creative Commons](#) licence will apply to this Work are set out in our licence referred to above.

Other than as permitted in any relevant BMJ Author's Self Archiving Policies, I confirm this Work has not been accepted for publication elsewhere, is not being considered for publication elsewhere and does not duplicate material already published. I confirm all authors consent to publication of this Work and authorise the granting of this licence.

## **Title Page**

**Title:** The association between chronic obstructive pulmonary disease and periodontal disease: a systematic review and meta-analysis

**Authors' full names:** Mei Yang<sup>1\*</sup>, Ran Peng<sup>1,2\*</sup>, Xiaou Li<sup>1\*</sup>, Junjie Peng<sup>1</sup>, Lin Liu<sup>2#</sup>, Lei Chen<sup>1#</sup>

**Authors' affiliations:** <sup>1</sup>Department of Pulmonary and Critical Care Medicine, West China Hospital, Sichuan University, Chengdu, Sichuan 610041, China.

<sup>2</sup>Department of Pulmonary and Critical Care Medicine, 363 Hospital, Chengdu, Sichuan 610041, China

\* Contributed equally.

**#Correspondence to:** Lei Chen (lchens@126.com), Department of Pulmonary and Critical Care Medicine, West China Hospital, Sichuan University, Chengdu, Sichuan 610041, China; Lin Liu (lliniu@126.com), Department of Pulmonary and Critical Care Medicine, 363 Hospital, Chengdu, Sichuan 610041, China

**Word count of the abstract:** 276

**Word count of the main text:** 3224



1  
2  
3  
4  
5 22  
6  
7

8 23 **The association between chronic obstructive pulmonary**  
9  
10 24 **disease and periodontal disease: a systematic review and**  
11  
12  
13 25 **meta-analysis**  
14  
15

16 26

17  
18 27 **ABSTRACT**

19  
20 28 **Objectives** Studies have suggested contradictory results on the relationship between  
21  
22  
23 29 chronic obstructive pulmonary disease (COPD) and periodontal disease (PD). The aim  
24  
25  
26 30 of this study was to determine whether PD increased the risk of COPD and COPD-  
27  
28  
29 31 related clinical events.

30  
31 32 **Design** Systematic review and meta-analysis.

32  
33 33 **Data sources** PubMed, Ovid EMBASE and Ovid CENTRAL were searched from  
34  
35  
36 34 inception to 22 February 2023.

37  
38 35 **Eligibility criteria for studies** We included trials and observational studies evaluating  
39  
40  
41 36 association of PD with the risk of COPD or COPD-related events (exacerbation and  
42  
43  
44 37 mortality), with statistical adjustment for smoking.

45  
46 38 **Data extraction and synthesis** Two investigators independently extracted data from  
47  
48  
49 39 selected studies using a standardized Excel file. Quality of studies was evaluated using  
50  
51  
52 40 the Newcastle-Ottawa Scale. Odds ratio (OR) with 95% confident interval (CI) was  
53  
54  
55 41 pooled in a random-effect model with inverse variance method.

56  
57 42 **Results** 22 observational studies with 51704 participants were included. Pooled analysis  
58  
59  
60

1  
2  
3  
4  
5 43 of 18 studies suggested that PD was weakly associated with the risk of COPD (OR 1.20,  
6  
7  
8 44 95% CI 1.09 to 1.32). However, in stratified and subgroup analyses, with strict  
9  
10 45 adjustment for smoking, PD no longer related to the risk of COPD (adjusting for  
11  
12  
13 46 smoking intensity: OR 1.14, 95% CI 0.86 to 1.51; smokers only: OR 1.46, 95% CI 0.92  
14  
15  
16 47 to 2.31; never smokers only: OR 0.93, 95% CI 0.72 to 1.21). Moreover, PD did not  
17  
18 48 increase the risk of COPD-related exacerbation or mortality (OR 1.18, 95% CI 0.71 to  
19  
20  
21 49 1.97) in the pooled result of four studies.

22  
23 50 **Conclusions** This study demonstrates PD confers no risk for COPD and COPD-related  
24  
25  
26 51 events when strictly adjusted by smoking. Large-scale prospective cohort studies with  
27  
28  
29 52 control of potential confounding factors are warranted to validate the present findings.

30  
31 53

## 32 33 54 **STRENGTHS AND LIMITATIONS OF THIS STUDY**

- 34  
35  
36 55 1. This systematic review and meta-analysis only included studies with statistical  
37  
38  
39 56 adjustment for smoking, to adequately control the confounding by smoking.
- 40  
41 57 2. We defined “periodontal disease” as a wide variety of periodontal abnormalities  
42  
43  
44 58 according to clinical and radiographic assessments, which is not limited to  
45  
46  
47 59 periodontitis.
- 48  
49 60 3. The language was restricted to English when conducting study searching, thus some  
50  
51  
52 61 literatures might have been missed.
- 53  
54 62 4. Clinical heterogeneity and publication bias compromised the evidence strength of  
55  
56  
57 63 this study, although subgroup and stratified analyses were performed.
- 58  
59  
60

64

## 65 INTRODUCTION

66 Chronic obstructive pulmonary disease (COPD) is the third leading cause of death,  
67 resulting in enormous economic burden.<sup>1</sup> Commonly, COPD coexists with a variety of  
68 disorders, called comorbidities, which play significant roles in the progression and  
69 prognosis of COPD.<sup>2,3</sup> Understanding the COPD-comorbidities relationship has been a  
70 momentous prerequisite for optimizing disease prevention and management strategies.<sup>2</sup>

71 <sup>3</sup>

72 Given ageing and widespread use of inhaled corticosteroids in COPD, periodontal  
73 disease (PD) has been a common comorbidity of COPD.<sup>4</sup> It is a chronic inflammatory  
74 condition of tissues surrounding and supporting the teeth, including gingiva, bone and  
75 ligament,<sup>5</sup> with the prevalence estimates over 10% around the world and especially  
76 prevalent in elderly individuals.<sup>6</sup> To date, diagnosis and assessment of PD are mostly  
77 based on periodontal measurements including clinical attachment level (CAL), probing  
78 pocket depth (PPD) and alveolar bone loss (ABL).<sup>5</sup> They are primary clinical  
79 manifestations of PD, reflecting the extent of periodontal tissue destruction.<sup>5</sup>

80 Based on the nature of inflammation,<sup>5,7</sup> mounting evidence has shed light on the  
81 association between PD and development of COPD.<sup>8,9</sup> Currently three points are  
82 proposed. First, they share the same risk factors, such as age, gender, smoking and  
83 socioeconomic status.<sup>2,10</sup> Second, they have similar pathogenetic mechanisms. Both  
84 diseases are characterized by host susceptibility to environmental factors, immune

1  
2  
3  
4  
5 85 overreaction, oxidative stress and production of pro-inflammatory cytokines.<sup>7 8</sup> Most  
6  
7  
8 86 importantly, neutrophilic inflammation plays a key role in both diseases.<sup>8 11</sup> Third, oral  
9  
10 87 bacteria released from the dental plaque in PD could trigger progression and acute  
11  
12  
13 88 exacerbation (AE) of COPD.<sup>12 13</sup>

14  
15 89 Meanwhile, epidemiological evidence has indicated that PD increases risk of COPD<sup>11</sup>  
16  
17  
18 90 <sup>14 15</sup> and COPD-related events.<sup>13 16</sup> Scannapieco *et al* revealed a 4.5-fold increased risk  
19  
20  
21 91 of COPD in patients with PD, compared with those without.<sup>14</sup> A dose-response  
22  
23 92 relationship was further implied between PD severity and lung function.<sup>15</sup> Among  
24  
25  
26 93 patients with both diseases, COPD-related AE and mortality also significantly linked  
27  
28  
29 94 with periodontal status.<sup>13 16</sup> Periodontal therapy, such as scaling and root planing  
30  
31 95 treatment, may ameliorate lung function and decrease frequency of AE in COPD with  
32  
33  
34 96 chronic periodontitis.<sup>17 18</sup> However, there were some other studies revealing opposite  
35  
36  
37 97 results, resulting in a long-standing controversy.<sup>19-21</sup> It is worth noting that, parameters  
38  
39  
40 98 used to determine PD apparently varied across studies, and these studies also failed to  
41  
42  
43 99 adequately control for confounders, especially smoking, the most important confounder  
44  
45  
46 100 for the COPD-PD relationship. Therefore, to provide the latest and most convincing  
47  
48  
49 101 evidence, we systematically reviewed current available literature to investigate whether  
50  
51  
52 102 PD increases the risk of COPD. The secondary objective was to evaluate the association  
53  
54  
55 103 between PD and the risk of COPD-related events. Subgroup and stratified analyses were  
56  
57  
58 104 also conducted to adjust for the confounding by smoking.

59  
60  
105

## 106 **METHODS**

107 This systematic review and meta-analysis was conducted and reported in accordance to  
108 the Preferred Reporting Items for Systematic Reviews and Meta-Analyses (PRISMA)  
109 guideline.<sup>22</sup>

### 111 **Search strategy and selection criteria**

112 We searched PubMed, Ovid EMBASE and Ovid Cochrane Central Register of  
113 Controlled Trials for records evaluating association between COPD and PD, from  
114 inception to 22 February 2023. The full search strategy was described in **online**  
115 **supplemental table 1**. The language was restricted to English, for the purpose of rapid  
116 review.<sup>23</sup> Studies meeting the following criteria were included: (1) adult participants  
117 ( $\geq 18$  years); (2) original studies with randomized controlled trial (RCT), cohort, case-  
118 control or cross-sectional study designs; (3) presenting clear diagnostic or assessment  
119 criteria for COPD and PD; (4) evaluating association between PD and the risk of COPD,  
120 or risk of COPD-related events (AE and mortality), with statistical adjustment for  
121 smoking, and providing the adjusted odds ratio (OR), relative risk (RR) or hazard ratio  
122 (HR) for the risk of COPD, AE and mortality in relation to PD. Given the inconsistent  
123 diagnostic criteria of PD across studies, we predefined PD as a wide variety of  
124 periodontal abnormalities according to clinical and radiographic assessments.<sup>24</sup>

125 According to the inclusion criteria, two independent investigators (MY and XL)  
126 performed systematical search, screened titles and abstracts of all retrieved studies to

1  
2  
3  
4  
5 127 exclude duplicate or irrelevant records. For articles requiring further assessment, full-  
6  
7  
8 128 text reviews were carried out and references of retrieved articles and relevant reviews  
9  
10 129 were also manually checked to identify additional eligible studies. Disagreements were  
11  
12  
13 130 resolved by discussion between the two reviewers or with the help of the third  
14  
15 131 investigator (RP).

16  
17  
18 132

### 19 20 133 **Data extraction and quality assessment**

21  
22  
23 134 Two investigators (MY and RP) independently extracted data from selected studies  
24  
25  
26 135 using a standardized Excel (Microsoft Corporation) file. The following information was  
27  
28  
29 136 extracted: author, year of publication, country, study design, number of subjects (COPD  
30  
31 137 and non-COPD), demographic characteristics of participants, diagnostic criteria for PD  
32  
33  
34 138 and COPD, definition of COPD-related AE and mortality, adjusted OR, RR or HR for  
35  
36 139 the risk of COPD, AE and mortality in relation to PD, as well as adjustment for  
37  
38  
39 140 confounders. The primary outcome was the risk of COPD. Secondary outcome was the  
40  
41  
42 141 risk of COPD-related adverse events, including AE and mortality. Quality of studies was  
43  
44  
45 142 independently evaluated using the Newcastle-Ottawa Scale<sup>25</sup> by two investigators (MY  
46  
47 143 and XL). A score of  $\geq 6$  was considered a low risk while  $< 6$  a high risk of bias. Both  
48  
49  
50 144 case-control and cohort studies had a maximum score of 9. Cross-sectional study was  
51  
52  
53 145 regarded as case-control study when performing quality assessment. Discrepancies  
54  
55  
56 146 regarding data extraction and quality assessment were resolved through discussion and  
57  
58  
59 147 consensus.  
60

1  
2  
3  
4  
5 148  
6  
78 149 **Data analysis**

9  
10 150 The final pooled estimate was expressed as OR with 95% confident interval (CI).  
11  
12 151 Considering CAL, ABL and PPD have been regarded as the primary parameters for  
13  
14 152 PD,<sup>24,26</sup> where more than one adjusted estimate was shown in the paper, we preferentially  
15  
16 153 used the estimate regarding these parameters (CAL > ABL > PPD), or the estimate being  
17  
18 154 better adjusted for tobacco smoking (never smokers > adjusting for smoking intensity  
19  
20 155 [duration and dose] > adjusting for smoking status), or the estimate regarding more  
21  
22 156 severe PD, where available. For case-control and cross-sectional studies, we estimated  
23  
24 157 the OR whereas for cohort studies we estimated the RR or HR. The random-effect model  
25  
26 158 with inverse variance method were applied due to potential heterogeneity resulting from  
27  
28 159 methodological differences. Heterogeneity across studies was identified with the I<sup>2</sup>  
29  
30 160 statistic. I<sup>2</sup> statistic >50% indicated significant heterogeneity.

31  
32  
33  
34  
35  
36  
37  
38 161 To explore heterogeneity, subgroup analyses were conducted based on study design  
39  
40 162 (case-control, cross-sectional and cohort studies), geographical location (Asia, North  
41  
42 163 America, Europe), assessment of PD (CAL, ABL and PPD), definition of COPD (Global  
43  
44 164 Initiative for Chronic Obstructive Lung Diseases, GOLD and non-GOLD criteria) and  
45  
46 165 adjustment for smoking intensity (dose and duration of smoking). To better control the  
47  
48 166 confounding effect of smoking, stratified analyses were performed in smokers and never  
49  
50 167 smokers respectively.

51  
52  
53  
54  
55  
56 168 To test the robustness of study findings, we performed sensitivity analysis on studies  
57  
58  
59  
60

1  
2  
3  
4  
5 169 with relatively large sample size ( $\geq 500$  participants), which tended to be more  
6  
7  
8 170 representative of the general population and with smaller bias in the overall estimates in  
9  
10 171 meta-analyses.<sup>27</sup> Additionally, influence of a single study on the overall pooled estimate  
11  
12  
13 172 was tested by omitting one study in each turn. Publication bias was visually assessed  
14  
15 173 using a funnel plot and quantitatively evaluated by the Egger's tests.  $P < 0.05$  was  
16  
17  
18 174 considered statistically significant. All statistical analyses were performed using Stata  
19  
20 175 version 16 (StataCorp) and Review manager version 5.4 (Cochrane Collaboration).  
21  
22

23 176

### 24 25 177 **Patient and public involvement**

26  
27  
28 178 No patients or other individuals are involved in the design, conduct, reporting or  
29  
30  
31 179 dissemination of this research.  
32

33 180

## 34 35 181 **RESULTS**

### 36 37 182 **Study selection and characteristics**

38  
39  
40 183 A total of 30165 records were identified from the initial database search. 13662 records  
41  
42  
43 184 were removed for duplicates, and 16227 records were excluded after titles and abstracts  
44  
45  
46 185 screening because of irrelevant content and animal studies. The remaining 276 full-text  
47  
48  
49 186 articles were identified for eligibility, of which 254 were excluded for reasons including  
50  
51  
52 187 duplicates (six studies), reviews (183 studies), insufficient information (nine studies) and  
53  
54  
55 188 ineligible designs and outcomes (56 studies). Finally, 22 studies<sup>14-16 19-21 28-43</sup> were  
56  
57 189 included in the review. The selection process is shown in **figure 1**.  
58  
59  
60



1  
2  
3  
4  
5 190 The characteristics of included 22 studies were shown in **table 1**. The number of  
6  
7  
8 191 participants was 51704 and there were 9973 (18.9%) patients with COPD. The mean age  
9  
10 192 of patients with COPD was between 45.1 and 83.1 years while the control subjects was  
11  
12  
13 193 between 42.2 and 80.3 years. These studies were published between 1998 and 2021. The  
14  
15 194 sample size ranged from 120 to 13792. Nine studies were case-control studies<sup>15 19 28 29 32</sup>  
16  
17  
18 195 <sup>33 36 40 42</sup> and 10 studies were cross-sectional studies,<sup>14 20 30 31 34 35 38 39 41 43</sup> only three  
19  
20 196 studies with a cohort study design.<sup>16 21 37</sup> Additionally, 11 studies were conducted in  
21  
22  
23 197 Asia,<sup>15 16 19 32 34 35 37 38 40-42</sup> while six studies in the North America,<sup>14 20 21 28-30</sup> four studies  
24  
25  
26 198 in Europe<sup>31 33 36 39</sup> and one study in Africa.<sup>43</sup>

199

200

**Table 1** Characteristics of included studies

| Year / Study                                | Design          | Location      | No. COPD /<br>Control subjects | Age (COPD /<br>Control subjects) | Assessment of<br>PD | Assessment of<br>COPD |
|---------------------------------------------|-----------------|---------------|--------------------------------|----------------------------------|---------------------|-----------------------|
| 1998 Hayes <i>et al</i> <sup>28</sup>       | Case-control    | United States | 261/857                        | 45.1±9.7/42.2±9.1                | ABL                 | FEV <sub>1</sub>      |
| 1998 Scannapieco <i>et al</i> <sup>14</sup> | Cross-sectional | United States | 77/309                         | NA                               | OHI                 | Self-reported         |
| 2001 Garcia <i>et al</i> <sup>29</sup>      | Case-control    | United States | 279/833                        | NA                               | ABL, PPD            | FEV <sub>1</sub>      |
| 2001 Scannapieco <i>et al</i> <sup>30</sup> | Cross-sectional | United States | 810/12,982                     | 51.2±17.9/43.9±17.7              | CAL, GB             | Self-reported         |
| 2004 Hyman <i>et al</i> <sup>20</sup>       | Cross-sectional | United States | 993/6,632                      | 62.3±14.1/47.4±14.2              | CAL                 | GOLD                  |
| 2008 Leuckfeld <i>et al</i> <sup>31</sup>   | Cross-sectional | Norway        | 130/50                         | 54.9±4.9/47.0±9.8                | ABL                 | GOLD                  |
| 2009 Wang <i>et al</i> <sup>19</sup>        | Case-control    | China         | 306/328                        | 63.9±9.8/63.3±9.0                | CAL, PLI            | GOLD                  |
| 2012 Liu <i>et al</i> <sup>42</sup>         | Case-control    | China         | 183/209*                       | 64.3±10.1/63.6±9.7               | CAL, PPD, BI        | GOLD                  |

1  
2  
3  
4  
5  
6  
7  
8  
9  
10  
11  
12  
13  
14  
15  
16  
17  
18  
19  
20  
21  
22  
23  
24  
25  
26  
27  
28  
29  
30  
31  
32  
33  
34  
35  
36  
37  
38  
39  
40  
41  
42  
43  
44  
45  
46  
47  
48  
49  
50  
51  
52  
53  
54  
55  
56  
57  
58  
59  
60

|                                                 |                 |               |                        |                    |                           |                        |
|-------------------------------------------------|-----------------|---------------|------------------------|--------------------|---------------------------|------------------------|
| 2012 Si <i>et al</i> <sup>15</sup>              | Case-control    | China         | 581/438                | 63.9±9.4/62.8±9.5  | CAL, ABL, PPD,<br>PLI, BI | GOLD                   |
| 2012 Zhou <i>et al</i> <sup>32</sup>            | Case-control    | China         | 193/181                | 63.6±10.3/62.1±9.1 | CAL, ABL, PPD,<br>PLI, BI | GOLD                   |
| 2013 Barros <i>et al</i> <sup>21</sup>          | Cohort          | United States | 399/1,236 <sup>§</sup> | 63.9±5.7/66.0±5.1  | CAL, PPD                  | GOLD                   |
| 2013 Ledić <i>et al</i> <sup>33</sup>           | Case-control    | Croatia       | 93/43                  | 65.8±9.7/62.1±11.9 | CAL                       | GOLD                   |
| 2016 Chung <i>et al</i> <sup>34</sup>           | Cross-sectional | Korea         | 697/5,181              | 64.3±0.2/54.6±0.1  | PPD, GB                   | GOLD                   |
| 2018 AbdelHalim <i>et al</i> <sup>43</sup>      | Cross-sectional | Egypt         | 134/116*               | 56.8±10.4/55.3±9.1 | CAL, PPD, BI,<br>PLI, OHI | GOLD                   |
| 2018 Harland <i>et al</i> <sup>35</sup>         | Cross-sectional | Japan         | 149/1,325              | 61.3±9.1/54.5±8.7  | PPD                       | GOLD                   |
| 2018 Lopez-de-Andrés <i>et al</i> <sup>36</sup> | Case-control    | Spain         | 2,699/2,699            | 63±14/61±14        | Self-reported             | Self-reported          |
| 2019 Takeuchi <i>et al</i> <sup>37</sup>        | Cohort          | Japan         | 22/878                 | NA                 | CAL, PPD                  | GOLD                   |
| 2020 Jung <i>et al</i> <sup>38</sup>            | Cross-sectional | Korea         | 1,134/6,585            | 62.6±0.4/53.6±0.2  | PPD                       | FEV <sub>1</sub> / FVC |
| 2020 Qian <i>et al</i> <sup>16</sup>            | Cohort          | China         | 23 <sup>‡</sup> /NA    | 83.1±4.8/80.3±3.7  | ABL                       | NR                     |
| 2020 Winning <i>et al</i> <sup>39</sup>         | Cross-sectional | Sweden        | 86/740                 | NA                 | ABL                       | GOLD                   |
| 2020 Zhou <i>et al</i> <sup>40</sup>            | Case-control    | China         | 60/60                  | 63.1±10.1/60.0±9.4 | CAL, PLI                  | GOLD                   |
| 2021 Kataoka <i>et al</i> <sup>41</sup>         | Cross-sectional | Japan         | 464/249                | 54.1±9.4/NA        | PPD                       | GOLD                   |

201 Continuous data are presented as mean ± standard deviation (SD) unless otherwise indicated.

202 \*No. COPD subjects with frequent exacerbation (≥2 exacerbations in the last year)/Infrequent exacerbation (< 2  
203 exacerbations in the last year).

204 <sup>§</sup>No. COPD subjects with events (hospitalization for exacerbation or COPD-related death) in the 5-year follow-up  
205 visit/COPD subjects without events in the 5-year follow-up visit.

206 <sup>‡</sup>No. COPD-related mortality in a follow-up visit more than 5 years.

207 ABL, alveolar bone loss; BI, bleeding index; CAL, clinical attachment level; FEV<sub>1</sub>, forced expiratory volume in 1

208 second; FVC, forced vital capacity; GB, gingival bleeding; GOLD, Global Initiative for Chronic Obstructive Lung

1  
2  
3  
4 209 Disease; NA, not available; OHI, oral health index; PD, periodontal disease; PLI, plaque index; PPD, probing pocket  
5 210 depth.  
6  
7 211

8  
9 212 All included articles performed multivariable analyses, in which the risk of COPD, or  
10  
11 213 risk of COPD-related events (AE or mortality), was identified as the dependent variable  
12  
13  
14 214 and PD as the independent variable. Controlling for confounding by smoking included  
15  
16 215 stratification (smokers and never smokers) or covariance adjustment in multivariable  
17  
18 216 models (the degree of control: never smokers > adjusting for smoking intensity [duration  
19  
20 217 and dose] > adjusting for smoking status).  
21  
22  
23

24 218 The adjustment for confounders of included studies was detailedly presented in **online**  
25  
26 219 **supplemental table 2**. 16 articles reported the adjusted ORs and 4 reported adjusted RRs,  
27  
28 220 two studies reporting HRs. Definition of COPD comprised the GOLD criteria,<sup>2</sup> FEV<sub>1</sub>  
29  
30 221 <65% of predicted volume, having a history of chronic bronchitis and / or emphysema,  
31  
32  
33 222 self-reported and others. Across almost all studies, periodontal examination was  
34  
35 223 conducted by experienced or trained dentists. Periodontal parameters used for diagnosis  
36  
37 224 of PD were CAL, ABL, PPD, gingival bleeding (GB), bleeding index (BI), plaque index  
38  
39 225 (PLI) and oral health index (OHI). The detailed diagnostic criteria applied by included  
40  
41 226 studies were presented in the **online supplemental table 3**.  
42  
43  
44  
45  
46  
47

48 227

#### 49 228 **Assessment of bias**

50  
51  
52  
53 229 Based on the Newcastle-Ottawa Scale, quality assessment for the 22 studies was shown  
54  
55 230 in **online supplemental table 4**. Among them, 18 studies<sup>15 19-21 28-30 32-42</sup> were rated as  
56  
57 231 high quality with a total score of  $\geq 6$  whereas four studies<sup>14 16 31 43</sup> as a score of <6,  
58  
59  
60

1  
2  
3  
4  
5 232 indicating a high risk of bias. The main reasons for lower scores were selection bias  
6  
7  
8 233 (representativeness of sample population), especially for control groups and  
9  
10 234 comparability of cases and control subjects.  
11  
12

13 235

### 15 236 **Primary outcome**

17  
18 237 18 studies<sup>14 15 19 20 28-41</sup> provided data for the risk of COPD in relation to PD. Quantitative  
19  
20 238 analysis demonstrated that after adjusting for smoking status, PD increased the risk of  
21  
22 239 COPD, but only by a ratio of 1.20 (95% CI 1.09 to 1.32,  $p=0.0002$ ,  $I^2=79\%$ ) (**figure 2**).  
23  
24  
25 240 Further exclusion of any single study did not materially alter the overall pooled OR, with  
26  
27 241 a range from 1.17 (95% CI 1.06-1.28) to 1.28 (95% CI 1.12-1.46). Sensitivity analysis  
28  
29 242 limited to studies with larger sample size ( $\geq 500$ )<sup>15 19 20 28-30 34-39 41</sup> revealed similar results  
30  
31 243 (OR 1.24, 95% CI 1.08 to 1.43,  $p=0.003$ ,  $I^2=82\%$ ) (**online supplemental figure 1**).  
32  
33  
34 244 However, significant publication bias was noted by visual inspections of the funnel plot  
35  
36 245 (**online supplemental figure 2**) and the Egger' s test for small study effects (bias  
37  
38 246 coefficient 1.49, 95% CI 0.44 to 2.55,  $p=0.008$ ).  
39  
40  
41  
42

43  
44 247 Subgroup analyses indicated that assessment parameters of PD ( $p=0.02$ ), study design  
45  
46 248 ( $p=0.05$ ) and diagnosis of COPD ( $p=0.05$ ) were the potential main causes of  
47  
48 249 heterogeneity (**table 2**). Moreover, there were several findings in subgroup analyses.  
49  
50 250 First, after further controlling for smoking intensity, PD did not increase the risk of  
51  
52 251 COPD (OR 1.14, 95% CI 0.86 to 1.51,  $p=0.38$ , 10 studies<sup>15 19 20 29-33 35 37</sup>), similar to the  
53  
54  
55 252 subgroup applying a GOLD criterion (OR 1.10, 95% CI 1.00 to 1.22,  $p=0.06$ , 12  
56  
57  
58  
59  
60

253 studies<sup>15 19 20 31-35 37 39-41</sup>). Second, among the parameters of CAL, ABL and PPD, only  
 254 subgroup using the parameter of ABL showed a significant association between PD and  
 255 the risk of COPD (OR 1.98, 95% CI 1.32 to 2.97,  $p=0.001$ , six studies<sup>15 28 29 31 32 39</sup>).  
 256 Third, in the three geographical locations (Asia, North America and Europe), only the  
 257 subgroup of Europe indicated that PD increased the risk of COPD (OR 2.05, 95% CI  
 258 1.07 to 3.95,  $p=0.03$ , four studies<sup>31 33 36 39</sup>).

259

260

**Table 2** Subgroup analyses regarding the risk of COPD

| Subgroups                                   | No. Studies | No. Participants<br>/Cases | OR value<br>(95% CI) | P<br>value    | I <sup>2</sup> , % |
|---------------------------------------------|-------------|----------------------------|----------------------|---------------|--------------------|
| Adjusted for smoking intensity <sup>a</sup> |             |                            |                      |               |                    |
| Yes                                         | 10          | 27,246 / 3,556             | 1.14 (0.86-1.51)     | 0.38          | 67                 |
| No                                          | 8           | 22,158 / 5,478             | 1.29 (1.13-1.48)     | <b>0.0002</b> | 75                 |
| Assessment of PD                            |             |                            |                      |               |                    |
| CAL                                         | 8           | 24,600 / 3,058             | 1.04 (0.96-1.14)     | 0.33          | 75                 |
| ABL                                         | 6           | 4,629 / 1,530              | 1.98 (1.32-2.97)     | <b>0.001</b>  | 56                 |
| PPD                                         | 8           | 19,189 / 3,519             | 1.16 (0.89-1.51)     | 0.27          | 63                 |
| Geographical location                       |             |                            |                      |               |                    |
| Asia                                        | 9           | 18,831 / 3,606             | 1.07 (0.99-1.17)     | 0.08          | 65                 |
| North America                               | 5           | 24,033 / 2,420             | 1.37 (0.93-2.01)     | 0.11          | 63                 |
| Europe                                      | 4           | 6,540 / 3,008              | 2.05 (1.07-3.95)     | <b>0.03</b>   | 71                 |

---

 Assessment of COPD

|                 |    |                |                   |               |    |
|-----------------|----|----------------|-------------------|---------------|----|
| GOLD            | 12 | 19,879 / 3,774 | 1.10 (1.00-1.22)  | 0.06          | 71 |
| Non-GOLD        | 6  | 29,525 / 5,260 | 1.35 (1.14-1.61)  | <b>0.0007</b> | 46 |
| Study design    |    |                |                   |               |    |
| Case-control    | 8  | 9,911 / 4,472  | 1.12 (1.01-1.24)  | <b>0.03</b>   | 86 |
| Cross-sectional | 9  | 38,593 / 4,540 | 1.34 (1.08-1.66)  | <b>0.007</b>  | 45 |
| Cohort          | 1  | 878 / 22       | 3.51 (1.15-10.74) | <b>0.03</b>   | -  |

---

261 <sup>a</sup>Duration and dose of smoking.

262 ABL, alveolar bone loss; CAL, clinical attachment level; CI, confident interval; GOLD, Global  
 263 Initiative for Chronic Obstructive Lung Disease; OR, odds ratio; PD, periodontal disease; PPD,  
 264 probing pocket depth.

265 **Bold:** subgroups with positive results.

266

267 Stratified analyses regarding smoking status revealed that PD did not increase the risk  
 268 of COPD whether in smokers (OR 1.46, 95% CI 0.92 to 2.31, p=0.11, seven studies<sup>15 19</sup>  
 269 <sup>20 29 31 32 35</sup>) or never smokers (OR 0.93, 95% CI 0.72 to 1.21, p=0.58, six studies<sup>15 19 20 29</sup>  
 270 <sup>32 35</sup>) (**online supplemental figure 3**).

271

## 272 Secondary outcome

273 Only four studies evaluated the risk of COPD-related AE or mortality.<sup>16 21 42 43</sup> Definition  
 274 of AE was acute deterioration in clinical presentations according to the recommendation  
 275 in GOLD guideline.<sup>21 42 43</sup> Pooled analysis showed that after adjusting for smoking status,  
 276 PD did not increase the risk of COPD-related AE or mortality (OR 1.18, 95% CI 0.71 to  
 277 1.97, p=0.52, I<sup>2</sup>=36%) (**figure 3**).

278

279 **DISCUSSION**

280 This systematic review and meta-analysis identified 22 observational studies to  
281 investigate the association between COPD and PD. The results indicated that, after  
282 strictly adjusting for confounding by smoking, PD did not increase the risk of COPD, as  
283 well as the risk of COPD-related AE or mortality. Moreover, these findings were  
284 consistent across the subgroup and stratified analyses.

285 To the best of our knowledge, this is the first and largest meta-analysis investigating  
286 the association of PD with the risk of COPD and its clinical events, with adequately  
287 controlling the confounding effect of smoking. Besides, nearly all included articles were  
288 adjusted for age, except the study by Scannapieco *et al.*<sup>14</sup> Prior publications have  
289 suggested that PD significantly increased the risk of COPD and COPD-related events.  
290 However, the majority of studies have non-negligible flaws, such as only performing  
291 univariate analyses, not controlling the confounding by smoking, and using parameters  
292 with relatively low specificity for determining PD.<sup>13 24 43</sup> In the present study, to define  
293 PD as accurately as possible, we preferentially extracted data concerning the parameters  
294 of CAL, ABL and PPD rather than PLI, OHI or remaining teeth. CAL, ABL and PPD  
295 are clinical measurements reflecting the destruction of periodontal tissues and  
296 momentous parameters for diagnosis of PD.<sup>24 44</sup> Meanwhile, compared with previous  
297 meta-analyses, we enrolled more studies, applied more rigorous screening criteria and  
298 most importantly, revealed opposite results. In the meta-analyses with incomplete

1  
2  
3  
4  
5 299 adjustment for smoking, OR value for the risk of COPD ranged from 1.28 to 2.08.<sup>45-48</sup>  
6  
7  
8 300 However, our findings were similar to studies conducted in never smokers,<sup>15 19 20 29 32 35</sup>  
9  
10 301 which showed that PD conferred no risk for COPD. Additionally, pooled analyses  
11  
12 302 regarding parameters of CAL, ABL and PPD revealed that PD also did not increase the  
13  
14 303 risk of COPD-related AE or mortality. These findings demonstrate that previously  
15  
16 304 reported correlation between PD and COPD may be results of flawed study design,  
17  
18 305 confounding by smoking and even other factors, such as age and living condition.  
19  
20  
21  
22

23 306 As a momentous inducer for inflammation-related pathological processes, tobacco is  
24  
25 307 known to correlate with a variety of systemic disorders.<sup>49</sup> It is also one of the foremost  
26  
27 308 risk factors for both COPD and PD.<sup>5 10</sup> From the epidemiological perspective, tobacco  
28  
29 309 smoking is a confounder with spuriously inflated effect on the relationship between PD  
30  
31 310 and systemic diseases.<sup>49</sup> To investigate the true association between PD and COPD, it is  
32  
33 311 of great importance to rigorously control the confounding effect of smoking, which  
34  
35 312 means initiating research in never smokers. However, the majority of former studies  
36  
37 313 failed to do that. After a wide search, only six studies focusing on never smokers were  
38  
39 314 found, which unanimously indicated PD was not related with the risk of COPD. We also  
40  
41 315 observed a decreased intensity of the association between both diseases with the increase  
42  
43 316 of control for smoking. Therefore, it could be too early to make a certain conclusion on  
44  
45 317 the COPD-PD relationship. Although interventional studies revealed that periodontal  
46  
47 318 treatment reduced the risk of AE, a number of problems existed, including small sample  
48  
49 319 size, limited study quality and unclear history of smoking or medication during the  
50  
51  
52  
53  
54  
55  
56  
57  
58  
59  
60



1  
2  
3  
4  
5 320 follow-up.<sup>17 18</sup> For example, compared with control subjects, patients in treatment groups  
6  
7 321 may reduce smoking intentionally, which could spuriously enhance the positive effect  
8  
9  
10 322 of periodontal treatment. Consequently, future researches need to take these problems  
11  
12  
13 323 into account.

14  
15 324 It is worth noting that, another possibility that smoking acts as an effect modifier in  
16  
17  
18 325 the COPD-PD relationship should not be ignored. Two observational studies performing  
19  
20  
21 326 stratified analyses concerning smoking status found that the strong correlation of PD  
22  
23 327 with the risk of COPD was restricted to smokers.<sup>15 20</sup> However, this was not revealed in  
24  
25  
26 328 the present study, thus more investigations in smokers and never smokers respectively  
27  
28  
29 329 are required.

30  
31 330 Besides, current evidence has demonstrated several issues to be addressed in future  
32  
33  
34 331 study, comprising inconsistent diagnostic criteria of COPD and PD, the lack of  
35  
36  
37 332 prospective study design and differing adjustments for covariates. These contribute to  
38  
39  
40 333 substantial heterogeneity among studies.<sup>45 46</sup> The present study indicated the  
41  
42  
43 334 heterogeneity was partly explained by study design, diagnostic criteria of COPD and PD.  
44  
45  
46 335 Significant association concerning PD and risk of COPD was only identified in  
47  
48  
49 336 subgroups lacking well designs, applying non-GOLD criteria or utilizing ABL as the  
50  
51  
52 337 measure of PD. For one thing, this demonstrated that, as sources of bias, observational  
53  
54  
55 338 study design and nonstandard diagnostic method for COPD could induce apparent  
56  
57  
58 339 deviations, confusing the true relationship between COPD and PD. For another, given  
59  
60 340 undetermined diagnostic criteria for PD, discrepancies between ABL and other indexes

1  
2  
3  
4  
5 341 cannot fully support the COPD-PD association. Notably, as a radiographic measure,  
6  
7  
8 342 although ABL has been widely considered to reflect cumulative effects of periodontal  
9  
10 343 attachment loss over time by chronic inflammation,<sup>28</sup> it does not only exist in PD. Non-  
11  
12  
13 344 periodontal diseases such as liver disorders, cancer and osteoporosis<sup>50</sup> could also result  
14  
15 345 in ABL. As mentioned previously,<sup>28</sup> the observed correlation between ABL and risk of  
16  
17  
18 346 COPD may relate to those non-periodontal diseases.

19  
20  
21 347

### 22 23 348 **Limitations**

24  
25  
26 349 Several potential limitations should be taken into consideration when interpreting the  
27  
28  
29 350 present results. First, all included studies are observational, which are highly subject to  
30  
31  
32 351 selection bias and confounding by indication. Second, substantial heterogeneity was  
33  
34  
35 352 identified in current study, though we conducted subgroup and stratified analyses to  
36  
37  
38 353 partly explain and reduce it. As stated above, several problems leading to heterogeneity  
39  
40  
41 354 need to be addressed in future researches. Third, the number of studies on risk of COPD-  
42  
43  
44 355 related events was limited, thus the result needs to be carefully understood. Limited  
45  
46  
47 356 number of studies in subgroup and stratified analyses suggested more relevant studies  
48  
49  
50 357 with larger sample size are required. Fourth, although confounding effects of age and  
51  
52  
53 358 smoking were controlled by stratified analysis and statistical adjustment, other potential  
54  
55  
56 359 confounders such as gender, living condition and socioeconomic status<sup>10</sup> could also  
57  
58  
59 360 reduce reliability of the results. Fifth, obvious publication bias was noted in relevant  
60  
361 meta-analyses,<sup>45 46</sup> including the present study. For the purpose of rapid review,<sup>23</sup> we

1  
2  
3  
4  
5 362 only included articles in English. There could exist non-English publications and  
6  
7  
8 363 unpublished evidence, although we searched English-language studies as much as  
9  
10 364 possible. Finally, although smoking status and intensity were considered in subgroup  
11  
12  
13 365 analysis, information regarding tobacco content and chemical composition were not  
14  
15 366 collected. This information is difficult to obtain, especially from self-reported smoking,  
16  
17  
18 367 leaving a residual smoking-related bias. Consequently, it is advisable to explore  
19  
20  
21 368 relationship between COPD and PD in never smokers.  
22

23 369

## 26 370 **CONCLUSION**

28 371 In summary, this systematic review and meta-analysis suggests that PD is not associated  
29  
30  
31 372 with the risk of COPD and COPD-related events after strict adjustment for smoking,  
32  
33  
34 373 although the positive relationship between COPD and PD was previously reported.  
35  
36 374 Large-scale prospective cohort studies with control of potential confounding factors are  
37  
38  
39 375 warranted to validate the present findings.  
40

41 376

## 44 377 **Abbreviations**

46 378 ABL: Alveolar bone loss; AE: Acute exacerbation; BI: Bleeding index; CAL: Clinical  
47  
48  
49 379 attachment level; CI: Confident interval; COPD: Chronic obstructive pulmonary disease;  
50  
51  
52 380 GB: Gingival bleeding; GOLD: Global Initiative for Chronic Obstructive Lung Diseases;  
53  
54  
55 381 HR: Hazard ratio; OHI: Oral health index; OR: Odds ratio; PD: Periodontal disease; PLI:  
56  
57 382 Plaque index; PPD: Probing pocket depth; RR: Relative risk.  
58  
59  
60

1  
2  
3  
4  
5 383  
6  
7

8 384 **Contributors** LC and LL designed the study. MY and XL screened and selected relevant  
9  
10 385 studies. MY, RP and XL rated the study quality and extracted the data. MY, RP, XL and  
11  
12 386 JP analyzed the data. All authors interpreted the data, and MY, RP, XL, JP drafted the  
13  
14 387 paper. LC and LL critically revised the paper. All authors acknowledged and agreed with  
15  
16 388 the format and content of the paper before submission for publication. LC and LL are  
17  
18 389 the guarantors and responsible for the overall contents of this study.  
19  
20  
21  
22

23 390  
24  
25

26 391 **Funding** This study was supported in part by grant 2016YFC0901100 from the National  
27  
28 392 Key Research and Development Program of China.  
29  
30

31 393  
32  
33

34 394 **Competing interests** None declared.  
35  
36

37 395  
38  
39

40 396 **Patient and public involvement** No patients or other individuals are involved in the  
41  
42 397 design, conduct, reporting or dissemination of this research.  
43  
44

45 398  
46  
47

48 399 **Patient consent for publication** Not applicable.  
49  
50

51 400  
52  
53

54 401 **Ethics approval** Not applicable.  
55  
56

57 402  
58  
59

60 403 **Data availability statement** All data relevant to the study are included in the article or

404 uploaded as supplementary information.

405

## 406 ORCID iD

407 Lei Chen <https://orcid.org/0000-0003-3476-0035>

408

## 409 REFERENCES

- 410 1. World Health Organization. The top 10 causes of death, 2020. Available:  
411 <https://www.who.int/news-room/fact-sheets/detail/the-top-10-causes-of-death> (accessed 25  
412 February 2023).
- 413 2. Global Initiative for Chronic Obstructive Lung Disease. Global strategy for the diagnosis,  
414 management and prevention of chronic obstructive pulmonary disease (2023 report).  
415 Available: <https://goldcopd.org/2023-gold-report-2/> (accessed 25 February 2023).
- 416 3. Negewo NA, Gibson PG, McDonald VM. COPD and its comorbidities: Impact,  
417 measurement and mechanisms. *Respirology* 2015;20:1160-1171.
- 418 4. Tan L, Tang X, Pan C, *et al*. Relationship among clinical periodontal, microbiologic  
419 parameters and lung function in participants with chronic obstructive pulmonary disease. *J*  
420 *Periodontol* 2019;90:134-140.
- 421 5. Pihlstrom BL, Michalowicz BS, Johnson NW. Periodontal diseases. *Lancet*  
422 2005;366:1809-1820.
- 423 6. Kassebaum NJ, Bernabé E, Dahiya M, *et al*. Global burden of severe periodontitis in 1990-  
424 2010: a systematic review and meta-regression. *J Dent Res* 2014;93:1045-1053.
- 425 7. Sczepanik FSC, Grossi ML, Casati M, *et al*. Periodontitis is an inflammatory disease of  
426 oxidative stress: We should treat it that way. *Periodontol 2000* 2020;84:45-68.
- 427 8. Usher AK, Stockley RA. The link between chronic periodontitis and COPD: a common  
428 role for the neutrophil? *BMC Med* 2013;11:241.
- 429 9. Dong J, Li W, Wang Q, *et al*. Relationships Between Oral Microecosystem and  
430 Respiratory Diseases. *Front Mol Biosci* 2021;8:718222.
- 431 10. Genco RJ, Borgnakke WS. Risk factors for periodontal disease. *Periodontol 2000*  
432 2013;62:59-94.
- 433 11. Sapey E, Yonel Z, Edgar R, *et al*. The clinical and inflammatory relationships between  
434 periodontitis and chronic obstructive pulmonary disease. *J Clin Periodontol* 2020;47:1040-  
435 1052.
- 436 12. Scannapieco FA. Role of oral bacteria in respiratory infection. *J Periodontol* 1999;70:793-  
437 802.
- 438 13. Kelly N, Winning L, Irwin C, *et al*. Periodontal status and chronic obstructive pulmonary  
439 disease (COPD) exacerbations: a systematic review. *BMC Oral Health* 2021;21:425.
- 440 14. Scannapieco FA, Papandonatos GD, Dunford RG. Associations between oral conditions

- 1  
2  
3  
4 441 and respiratory disease in a national sample survey population. *Ann Periodontol*  
5 442 1998;3:251-256.
- 7 443 15. Si Y, Fan H, Song Y, *et al.* Association between periodontitis and chronic obstructive  
8 444 pulmonary disease in a Chinese population. *J Periodontol* 2012;83:1288-1296.
- 9 445 16. Qian Y, Yuan W, Mei N, *et al.* Periodontitis increases the risk of respiratory disease  
10 446 mortality in older patients. *Exp Gerontol* 2020;133:110878.
- 12 447 17. Zhou X, Han J, Liu Z, *et al.* Effects of periodontal treatment on lung function and  
13 448 exacerbation frequency in patients with chronic obstructive pulmonary disease and chronic  
14 449 periodontitis: a 2-year pilot randomized controlled trial. *J Clin Periodontol* 2014;41:564-  
15 450 572.
- 17 451 18. Kucukcoskun M, Baser U, Oztekin G, *et al.* Initial periodontal treatment for prevention of  
18 452 chronic obstructive pulmonary disease exacerbations. *J Periodontol* 2013;84:863-870.
- 19 453 19. Wang Z, Zhou X, Zhang J, *et al.* Periodontal health, oral health behaviours, and chronic  
20 454 obstructive pulmonary disease. *J Clin Periodontol* 2009;36:750-755.
- 22 455 20. Hyman JJ, Reid BC. Cigarette smoking, periodontal disease: and chronic obstructive  
23 456 pulmonary disease. *J Periodontol* 2004;75:9-15.
- 24 457 21. Barros SP, Suruki R, Loewy ZG, *et al.* A cohort study of the impact of tooth loss and  
25 458 periodontal disease on respiratory events among COPD subjects: modulatory role of  
26 459 systemic biomarkers of inflammation. *PLoS One* 2013;8:e68592.
- 28 460 22. Moher D, Shamseer L, Clarke M, *et al.* Preferred reporting items for systematic review and  
29 461 meta-analysis protocols (PRISMA-P) 2015 statement. *Syst Rev* 2015;4:1.
- 30 462 23. Nussbaumer-Streit B, Klerings I, Dobrescu AI, *et al.* Excluding non-English publications  
31 463 from evidence-syntheses did not change conclusions: a meta-epidemiological study. *J Clin*  
32 464 *Epidemiol* 2020;118:42-54.
- 33 465 24. Kinane DF, Stathopoulou PG, Papapanou PN. Periodontal diseases. *Nat Rev Dis Primers*  
34 466 2017;3:17038.
- 35 467 25. Wells G, Shea B, O'Connell D, *et al.* The Newcastle-Ottawa Scale (NOS) for assessing the  
36 468 quality of nonrandomised studies in meta-analyses, 2021. Available:  
37 469 [http://www.ohri.ca/programs/clinical\\_epidemiology/oxford.asp](http://www.ohri.ca/programs/clinical_epidemiology/oxford.asp) (accessed 25 February  
38 470 2023).
- 39 471 26. Farook FF, Alodwene H, Alharbi R, *et al.* Reliability assessment between clinical  
40 472 attachment loss and alveolar bone level in dental radiographs. *Clin Exp Dent Res*  
41 473 2020;6:596-601.
- 42 474 27. Lin L. Bias caused by sampling error in meta-analysis with small sample sizes. *PLoS One*  
43 475 2018;13:e0204056.
- 44 476 28. Hayes C, Sparrow D, Cohen M, *et al.* The association between alveolar bone loss and  
45 477 pulmonary function: the VA Dental Longitudinal Study. *Ann Periodontol* 1998;3:257-261.
- 46 478 29. Garcia RI, Nunn ME, Vokonas PS. Epidemiologic associations between periodontal  
47 479 disease and chronic obstructive pulmonary disease. *Ann Periodontol* 2001;6:71-77.
- 48 480 30. Scannapieco FA, Ho AW. Potential associations between chronic respiratory disease and  
49 481 periodontal disease: analysis of National Health and Nutrition Examination Survey III. *J*  
50 482 *Periodontol* 2001;72:50-56.
- 51 483 31. Leuckfeld I, Obregon-Whittle MV, Lund MB, *et al.* Severe chronic obstructive pulmonary  
52  
53  
54  
55  
56  
57  
58  
59  
60

- 1  
2  
3  
4 484 disease: association with marginal bone loss in periodontitis. *Respir Med* 2008;102:488-  
5 485 494.  
6  
7 486 32. Zhou X, Han J, Song Y, *et al.* Serum levels of 25-hydroxyvitamin D, oral health and  
8 487 chronic obstructive pulmonary disease. *J Clin Periodontol* 2012;39:350-356.  
9  
10 488 33. Ledić K, Marinković S, Puhar I, *et al.* Periodontal disease increases risk for chronic  
11 489 obstructive pulmonary disease. *Coll Antropol* 2013;37:937-942.  
12 490 34. Chung JH, Hwang HJ, Kim SH, *et al.* Associations Between Periodontitis and Chronic  
13 491 Obstructive Pulmonary Disease: The 2010 to 2012 Korean National Health and Nutrition  
14 492 Examination Survey. *J Periodontol* 2016;87:864-871.  
15 493 35. Harland J, Furuta M, Takeuchi K, *et al.* Periodontitis modifies the association between  
16 494 smoking and chronic obstructive pulmonary disease in Japanese men. *J Oral Sci*  
17 495 2018;60:226-231.  
18  
19 496 36. Lopez-de-Andrés A, Vazquez-Vazquez L, Martinez-Huedo MA, *et al.* Is COPD associated  
20 497 with periodontal disease? A population-based study in Spain. *Int J Chron Obstruct Pulmon*  
21 498 *Dis* 2018;13:3435-3445.  
22  
23 499 37. Takeuchi K, Matsumoto K, Furuta M, *et al.* Periodontitis Is Associated with Chronic  
24 500 Obstructive Pulmonary Disease. *J Dent Res* 2019;98:534-540.  
25  
26 501 38. Jung ES, Lee KH, Choi YY. Association between oral health status and chronic obstructive  
27 502 pulmonary disease in Korean adults. *Int Dent J* 2020;70:208-213.  
28  
29 503 39. Winning L, Polyzois I, Sanmartin Berglund J, *et al.* Periodontitis and airflow limitation in  
30 504 older Swedish individuals. *J Clin Periodontol* 2020;47:715-725.  
31  
32 505 40. Zhou X, Wang J, Liu W, *et al.* Periodontal Status and Microbiologic Pathogens in Patients  
33 506 with Chronic Obstructive Pulmonary Disease and Periodontitis: A Case-Control Study. *Int*  
34 507 *J Chron Obstruct Pulmon Dis* 2020;15:2071-2079.  
35  
36 508 41. Kataoka S, Kimura M, Yamaguchi T, *et al.* A cross-sectional study of relationships  
37 509 between periodontal disease and general health: The Hitachi Oral Healthcare Survey. *BMC*  
38 510 *Oral Health* 2021;21:644.  
39  
40 511 42. Liu Z, Zhang W, Zhang J, *et al.* Oral hygiene, periodontal health and chronic obstructive  
41 512 pulmonary disease exacerbations. *J Clin Periodontol* 2012;39:45-52.  
42  
43 513 43. Abdelhalim H, Aboelnaga H, Aggour R. Chronic obstructive pulmonary disease  
44 514 exacerbations and periodontitis: a possible association. *Egyptian Journal of Bronchology*  
45 515 2018;12.  
46  
47 516 44. Papananou PN, Sanz M, Buduneli N, *et al.* Periodontitis: Consensus report of workgroup 2  
48 517 of the 2017 World Workshop on the Classification of Periodontal and Peri-Implant  
49 518 Diseases and Conditions. *J Clin Periodontol* 2018;45 Suppl 20:S162-s170.  
50  
51 519 45. Zeng XT, Tu ML, Liu DY, *et al.* Periodontal disease and risk of chronic obstructive  
52 520 pulmonary disease: a meta-analysis of observational studies. *PLoS One* 2012;7:e46508.  
53  
54 521 46. Gomes-Filho IS, Cruz SSD, Trindade SC, *et al.* Periodontitis and respiratory diseases: A  
55 522 systematic review with meta-analysis. *Oral Dis* 2020;26:439-446.  
56  
57 523 47. Wu Z, Xiao C, Chen F, *et al.* Pulmonary disease and periodontal health: a meta-analysis.  
58 524 *Sleep Breath* 2022.  
59  
60 525 48. Molina A, Huck O, Herrera D, *et al.* The association between respiratory diseases and  
61 526 periodontitis: A systematic review and meta-analysis. *J Clin Periodontol* 2023.

- 1  
2  
3  
4 527 49. Hujoel PP, Drangsholt M, Spiekerman C, *et al.* Periodontitis-systemic disease associations  
5 528 in the presence of smoking--causal or coincidental? *Periodontol 2000* 2002;30:51-60.  
6  
7 529 50. Intini G, Katsuragi Y, Kirkwood KL, *et al.* Alveolar bone loss: mechanisms, potential  
8  
9 530 therapeutic targets, and interventions. *Adv Dent Res* 2014;26:38-46.

10  
11 531

12  
13  
14 532

15  
16  
17 533

18  
19 534

20  
21  
22 535

23  
24  
25 536

26  
27 537

28  
29  
30 538

31  
32 539

33  
34  
35 540

36  
37 541

38  
39  
40 542

41  
42  
43 543

44  
45 544

46  
47  
48 545

49  
50  
51 546

52  
53 **Figure legends**

54  
55 548 **Figure 1** PRISMA flow diagram of study selection.

56  
57  
58 549 **Figure 2** Forest plot of the risk of COPD by periodontal disease, subgroup analysis based  
59  
60



1  
2  
3  
4  
5  
6  
7  
8  
9  
10  
11  
12  
13  
14  
15  
16  
17  
18  
19  
20  
21  
22  
23  
24  
25  
26  
27  
28  
29  
30  
31  
32  
33  
34  
35  
36  
37  
38  
39  
40  
41  
42  
43  
44  
45  
46  
47  
48  
49  
50  
51  
52  
53  
54  
55  
56  
57  
58  
59  
60

550 on adjusted by smoking status and intensity versus by smoking status only. Values more  
551 than one indicate a higher risk in patients with periodontal disease.  
552 **Figure 3** Forest plot of the risk of COPD-related events by periodontal disease. Values  
553 more than one indicate a higher risk in patients with periodontal disease.

For peer review only

1  
2  
3  
4  
5  
6  
7  
8  
9  
10  
11  
12  
13  
14  
15  
16  
17  
18  
19  
20  
21  
22  
23  
24  
25  
26  
27  
28  
29  
30  
31  
32  
33  
34  
35  
36  
37  
38  
39  
40  
41  
42  
43  
44  
45  
46  
47  
48  
49  
50  
51  
52  
53  
54  
55  
56  
57  
58  
59  
60

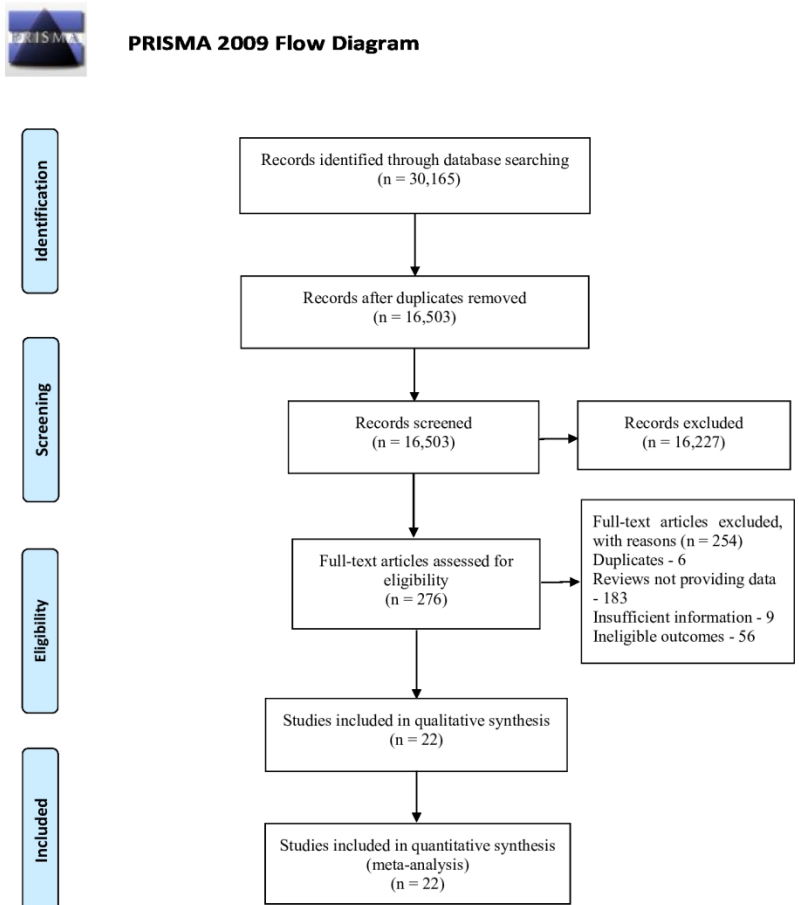

Figure 1 PRISMA flow diagram of study selection.

215x279mm (200 x 200 DPI)



Figure 2 Forest plot of the risk of COPD by periodontal disease, subgroup analysis based on adjusted by smoking status and intensity versus by smoking status only. Values more than one indicate a higher risk in patients with periodontal disease.

536x384mm (118 x 118 DPI)

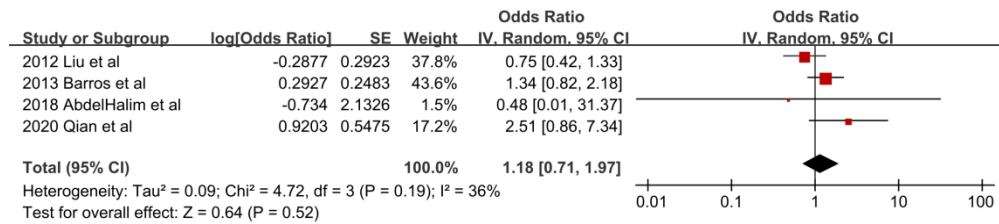

Figure 3 Forest plot of the risk of COPD-related events by periodontal disease. Values more than one indicate a higher risk in patients with periodontal disease.

497x118mm (118 x 118 DPI)

**Table 1 Search strategy****Database 1: PubMed**

("oral health"[MeSH Terms] OR ("oral"[All Fields] AND "health"[All Fields]) OR  
 "oral health"[All Fields] OR ("periodontal diseases"[MeSH Terms] OR  
 ("periodontal"[All Fields] AND "diseases"[All Fields]) OR "periodontal  
 diseases"[All Fields] OR ("periodontal"[All Fields] AND "disease"[All Fields]) OR  
 "periodontal disease"[All Fields]) OR ("periodontal"[All Fields] OR  
 "periodontally"[All Fields] OR "periodontically"[All Fields] OR  
 "periodontics"[MeSH Terms] OR "periodontics"[All Fields] OR "periodontic"[All  
 Fields] OR "periodontitis"[MeSH Terms] OR "periodontitis"[All Fields] OR  
 "periodontitides"[All Fields]) AND ("health"[MeSH Terms] OR "health"[All  
 Fields] OR "health s"[All Fields] OR "healthful"[All Fields] OR  
 "healthfulness"[All Fields] OR "healths"[All Fields])) OR ("periodontal"[All  
 Fields] OR "periodontally"[All Fields] OR "periodontically"[All Fields] OR  
 "periodontics"[MeSH Terms] OR "periodontics"[All Fields] OR "periodontic"[All  
 Fields] OR "periodontitis"[MeSH Terms] OR "periodontitis"[All Fields] OR  
 "periodontitides"[All Fields]) OR (("ambulatory care facilities"[MeSH Terms] OR  
 ("ambulatory"[All Fields] AND "care"[All Fields] AND "facilities"[All Fields]) OR  
 "ambulatory care facilities"[All Fields] OR "clinic"[All Fields] OR "clinic s"[All  
 Fields] OR "clinical"[All Fields] OR "clinically"[All Fields] OR "clinicals"[All  
 Fields] OR "clinics"[All Fields]) AND ("attach"[All Fields] OR "attachable"[All  
 Fields] OR "attached"[All Fields] OR "attachement"[All Fields] OR "attaches"[All  
 Fields] OR "attaching"[All Fields] OR "attachment"[All Fields] OR  
 "attachments"[All Fields]) AND ("level"[All Fields] OR "levels"[All Fields])) OR  
 ("alveolar bone loss"[MeSH Terms] OR ("alveolar"[All Fields] AND "bone"[All  
 Fields] AND "loss"[All Fields]) OR "alveolar bone loss"[All Fields]) OR  
 (("probe"[All Fields] OR "probe s"[All Fields] OR "probed"[All Fields] OR  
 "probes"[All Fields] OR "probing"[All Fields] OR "probings"[All Fields]) AND  
 ("depth"[All Fields] OR "depths"[All Fields])) AND ("respiratory tract  
 diseases"[MeSH Terms] OR ("respiratory"[All Fields] AND "tract"[All Fields]  
 AND "diseases"[All Fields]) OR "respiratory tract diseases"[All Fields] OR  
 ("respiratory"[All Fields] AND "disease"[All Fields]) OR "respiratory disease"[All  
 Fields] OR "respiration disorders"[MeSH Terms] OR ("respiration"[All Fields]  
 AND "disorders"[All Fields]) OR "respiration disorders"[All Fields] OR  
 ("respiratory"[All Fields] AND "disease"[All Fields]) OR ("pulmonary disease,  
 chronic obstructive"[MeSH Terms] OR ("pulmonary"[All Fields] AND  
 "disease"[All Fields] AND "chronic"[All Fields] AND "obstructive"[All Fields])  
 OR "chronic obstructive pulmonary disease"[All Fields] OR ("chronic"[All Fields]

AND "obstructive"[All Fields] AND "pulmonary"[All Fields] AND "disease"[All Fields])) OR (("lung"[MeSH Terms] OR "lung"[All Fields] OR "pulmonary"[All Fields]) AND ("functional"[All Fields] OR "functional s"[All Fields] OR "functionalities"[All Fields] OR "functionality"[All Fields] OR "functionalization"[All Fields] OR "functionalizations"[All Fields] OR "functionalize"[All Fields] OR "functionalized"[All Fields] OR "functionalizes"[All Fields] OR "functionalizing"[All Fields] OR "functionally"[All Fields] OR "functionals"[All Fields] OR "functioned"[All Fields] OR "functioning"[All Fields] OR "functionings"[All Fields] OR "functions"[All Fields] OR "physiology"[MeSH Subheading] OR "physiology"[All Fields] OR "function"[All Fields] OR "physiology"[MeSH Terms])) OR (("airflow"[All Fields] OR "airflows"[All Fields]) AND ("limit"[All Fields] OR "limitation"[All Fields] OR "limitations"[All Fields] OR "limited"[All Fields] OR "limiting"[All Fields] OR "limits"[All Fields])))) AND (english[Filter])

#### Database 2: Ovid EMBASE

| Sequence | Query                                                                                                                                                                                                                                                                                                          |
|----------|----------------------------------------------------------------------------------------------------------------------------------------------------------------------------------------------------------------------------------------------------------------------------------------------------------------|
| 1        | ((Oral health) OR (periodontal disease) OR (periodontal health) OR (periodontitis) OR (clinical attachment level) OR (alveolar bone loss) OR (probing depth)) AND ((Respiratory disease) OR (chronic obstructive pulmonary disease) OR (pulmonary function) OR (airflow limitation)) {Including Related Terms} |
| 2        | limit 1 to (full text and human and english language)                                                                                                                                                                                                                                                          |
| 3        | limit 1 to english language                                                                                                                                                                                                                                                                                    |

#### Database 3: Ovid Cochrane Central Register of Controlled Trials

| Sequence | Query                                                                                                                                                                                                                                                                                                          |
|----------|----------------------------------------------------------------------------------------------------------------------------------------------------------------------------------------------------------------------------------------------------------------------------------------------------------------|
| 1        | ((Oral health) OR (periodontal disease) OR (periodontal health) OR (periodontitis) OR (clinical attachment level) OR (alveolar bone loss) OR (probing depth)) AND ((Respiratory disease) OR (chronic obstructive pulmonary disease) OR (pulmonary function) OR (airflow limitation)) {Including Related Terms} |
| 2        | limit 1 to english language                                                                                                                                                                                                                                                                                    |

**Table 2 Adjustment for confounders of included studies**

| Study Author                               | Covariates in logistic regression multivariable model                                                                                                      |
|--------------------------------------------|------------------------------------------------------------------------------------------------------------------------------------------------------------|
| Hayes <i>et al</i> <sup>1</sup>            | Age, smoking, education, height                                                                                                                            |
| Scannapieco <i>et al</i> <sup>2</sup>      | Smoking                                                                                                                                                    |
| Garcia <i>et al</i> <sup>3</sup>           | Age, height, alcohol, education ( <b>with stratified analysis on smoking</b> )                                                                             |
| Leuckfeld <i>et al</i> <sup>4</sup>        | Age, female gender, <b>pack years of smoking</b>                                                                                                           |
| Liu <i>et al</i> <sup>5</sup>              | Age, gender, BMI and smoking                                                                                                                               |
| Wang <i>et al</i> <sup>6</sup>             | Age, gender, BMI ( <b>with stratified analysis on smoking</b> )                                                                                            |
| Si <i>et al</i> <sup>7</sup>               | Age, gender, occupation, educational level ( <b>with stratified analysis on smoking</b> )                                                                  |
| Zhou <i>et al</i> <sup>8</sup>             | Age, gender, smoking, BMI, season ( <b>with stratified analysis on smoking</b> )                                                                           |
| Ledić <i>et al</i> <sup>9</sup>            | Age, gender, <b>pack years of smoking</b> , BMI                                                                                                            |
| Lopez-de-Andrés <i>et al</i> <sup>10</sup> | Age, gender, smoking, educational level, DM, obesity                                                                                                       |
| Zhou <i>et al</i> <sup>11</sup>            | Age, gender, smoking, BMI                                                                                                                                  |
| Kataoka <i>et al</i> <sup>12</sup>         | Age, smoking                                                                                                                                               |
| Qian <i>et al</i> <sup>13</sup>            | Age, sex, education levels, BMI, smoking, drinking, hypertension, DM                                                                                       |
| Barros <i>et al</i> <sup>14</sup>          | Age, gender, Race, BMI, education, <b>pack years of smoking</b> , hypertension                                                                             |
| Scannapieco <i>et al</i> <sup>15</sup>     | Age, gender, <b>pack years of smoking</b> , Race, education, income, dental visits, alcohol, DM                                                            |
| Hyman <i>et al</i> <sup>16</sup>           | Age, gender, Race, history of hypertension and heart attack, dental visit within 1 year, BMI, family income ( <b>with stratified analysis on smoking</b> ) |
| Chung <i>et al</i> <sup>17</sup>           | Age, smoking, family income, education, alcohol, exercise, BMI, tooth brushing frequency, DM, number of natural teeth                                      |
| Harland <i>et al</i> <sup>18</sup>         | Age, number of present teeth, BMI, alcohol consumption, occupation, hypertension, DM ( <b>with stratified analysis on smoking</b> )                        |
| Takeuchi <i>et al</i> <sup>19</sup>        | Age, gender, <b>pack years of smoking</b> , occupation, DM, BMI, physical activity, alcohol intake, number of present teeth                                |

|                                       |                                                                                                                                                                                                                               |
|---------------------------------------|-------------------------------------------------------------------------------------------------------------------------------------------------------------------------------------------------------------------------------|
| Jung <i>et al</i> <sup>20</sup>       | Age, gender, smoking, educational level, household income, alcohol consumption, periodontal status, number of missing teeth, oral health factors                                                                              |
| Winning <i>et al</i> <sup>21</sup>    | Age, gender, smoking, height, BMI, exercise, DM, hypertension, MI, education level, living condition                                                                                                                          |
| AbdelHalim <i>et al</i> <sup>22</sup> | Age, BMI, low-level of education, <b>pack years of smoking</b> , MRC, CAT, hospitalizations, COPD category (C-D), FVC (% predicted), FEV1 (% predicted), FEV1 / FVC (% predicted), MMEF (% predicted), PEF (% predicted), CRP |

BMI, body mass index; CAT, chronic obstructive pulmonary disease assessment test; CRP, C-reactive protein; DM, diabetes mellitus; FEV1, forced expiratory volume in 1 second; FVC, forced vital capacity; MI, myocardial infarction; MMEF, maximum mid-expiratory flow; MRC, Medical Research Council; PEF, peak expiratory flow.

**Bold:** the covariate of smoking intensity (duration and dose) or stratified analyses on smoking status.



**Table 3 Diagnostic criteria for PD of included studies in quantitative analysis**

| <b>Study Author</b>                    | <b>Diagnostic parameter/criteria</b>                                                                                  | <b>Measurement/Calculation</b>                                                                                                                                                                  |
|----------------------------------------|-----------------------------------------------------------------------------------------------------------------------|-------------------------------------------------------------------------------------------------------------------------------------------------------------------------------------------------|
| Hayes <i>et al</i> <sup>1</sup>        | <b>Worst alveolar bone loss (ABL) quintile vs all others</b>                                                          | Worst ABL quintile had mean whole-mouth ABL scores of 20% or greater, i.e., an average of 20% or more ABL for each mesial and distal site measured.                                             |
| Scannapieco <i>et al</i> <sup>2</sup>  | <b>Simplified oral hygiene index=6</b>                                                                                | Calculated by adding together the simplified debris index and the simplified calculus index scores.                                                                                             |
| Garcia <i>et al</i> <sup>3</sup>       | <b>ABL</b>                                                                                                            | Periodontitis measure is mean, whole mouth, radiographic alveolar bone loss used as a continuous variable, with each unit of ABL representing 20% increments of bone loss.                      |
| Scannapieco <i>et al</i> <sup>15</sup> | <b>Mean attachment loss (AL) ≥ 3mm</b>                                                                                | AL was obtained by subtracting the distance from the free gingival margin (FGM) to the cemento-enamel junction (CEJ) of each tooth, from the distance from the FGM to the bottom of the sulcus. |
| Hyman <i>et al</i> <sup>16</sup>       | <b>Mean AL ≥ 4mm</b>                                                                                                  | AL was calculated based on the probe distance in millimeters from the FGM to the CEJ and the base of the sulcus.                                                                                |
| Leuckfeld <i>et al</i> <sup>4</sup>    | <b>Mean marginal bone level ≥ 4mm</b>                                                                                 | The marginal bone level distance was measured from the CEJ to the alveolar bone crest, at the mesial and distal aspects of approximal tooth sites, and was rounded off to the nearest 0.1mm.    |
| Wang <i>et al</i> <sup>6</sup>         | <b>Clinical attachment level (CAL) ≥ 4mm</b>                                                                          | Probing depth + CEJ = CAL; probing depth and CEJ were measured with a Williams periodontal probe at six sites of all teeth (excluding third molars) and recorded in millimetres.                |
| Liu <i>et al</i> <sup>5</sup>          | <b>CAL &gt; 4mm</b>                                                                                                   | Consistent with the study by Wang <i>et al</i> <sup>6</sup> .                                                                                                                                   |
| Si <i>et al</i> <sup>7</sup>           | <b>Probing depth ≥ 5mm and CAL ≥ 4mm</b>                                                                              | The two indices were recorded on six sites of each tooth.                                                                                                                                       |
| Zhou <i>et al</i> <sup>8</sup>         | <b>CAL</b>                                                                                                            | Consistent with the study by Wang <i>et al</i> <sup>6</sup> .                                                                                                                                   |
| Barros <i>et al</i> <sup>14</sup>      | <b>≥ 2 interproximal sites with CAL ≥ 6mm (not on same tooth) and ≥ 1 interproximal site with probing depth ≥ 5mm</b> | Using the consensus definitions published by the joint Center for Disease Control/American Association of Periodontology working group.                                                         |
| Ledić <i>et al</i> <sup>9</sup>        | <b>CAL ≥ 4mm at at least 60% of the measured sites</b>                                                                | CAL was determined as the distance from the CEJ to the bottom of the pocket. The aforementioned value                                                                                           |

|                                            |                                                                                                                                               |                                                                                                                                                                                              |
|--------------------------------------------|-----------------------------------------------------------------------------------------------------------------------------------------------|----------------------------------------------------------------------------------------------------------------------------------------------------------------------------------------------|
|                                            |                                                                                                                                               | was recorded on the nearest millimeter by one calibrated examiner on six places per tooth (mesiobuccally, buccally, distobuccally, mesiolingually, lingually and distolingually).            |
| Chung <i>et al</i> <sup>17</sup>           | <b>Community periodontal index (CPI) &gt;5.5mm pocket (deep periodontal pocket)</b>                                                           | WHO criteria (Oral health surveys: basic methods- 5th edition).                                                                                                                              |
| AbdelHalim <i>et al</i> <sup>22</sup>      | <b>CAL ≥5mm</b>                                                                                                                               | Calculations of CAL were done by summation of probing pocket depth (PPD) and recession value. Periodontal examination was performed on all existing teeth (excluding the third molar teeth). |
| Harland <i>et al</i> <sup>18</sup>         | <b>CPI score ≥3 (at least one sextant with a pocket depth ≥4 mm)</b>                                                                          | WHO criteria.                                                                                                                                                                                |
| Lopez-de-Andrés <i>et al</i> <sup>10</sup> | <b>Teeth bleeding spontaneously or while brushing, or/and teeth moving</b>                                                                    | Questionnaire investigation.                                                                                                                                                                 |
| Takeuchi <i>et al</i> <sup>19</sup>        | <b>Severe periodontitis (2 or more interproximal sites with ≥6mm CAL [not on same tooth] and 1 or more interproximal sites with ≥5mm PPD)</b> | According to the suggested Centers for Disease Control and American Academy of Periodontology case definitions for periodontitis surveillance.                                               |
| Jung <i>et al</i> <sup>20</sup>            | <b>CPI=3-4 (periodontal pockets ≥4mm)</b>                                                                                                     | The central incisor, first and second molars were selected as index teeth, and the highest score adopted as the participant's final CPI score.                                               |
| Qian <i>et al</i> <sup>13</sup>            | <b>Proportion of remaining bone height of the teeth (calculated from total root length and total bone height)</b>                             | Measurements of ABL were made from the CEJ to the tooth apex (total root length) and from the marginal bone crest to the tooth apex (total bone height).                                     |
| Winning <i>et al</i> <sup>21</sup>         | <b>A distance between the alveolar bone level and CEJ based on a threshold of ≥4mm found at ≥30% of teeth.</b>                                | The extent of ABL was measured at the mesial and distal aspects of all teeth excluding third molars.                                                                                         |
| Zhou <i>et al</i> <sup>11</sup>            | <b>CAL ≥5mm</b>                                                                                                                               | Consistent with the study by Wang <i>et al</i> <sup>6</sup>                                                                                                                                  |
| Kataoka <i>et al</i> <sup>12</sup>         | <b>PPD ≥4mm</b>                                                                                                                               | The PPD was measured at the disto-, mid-, and mesio-buccal, as well as the disto-, mid-, and mesio-lingual buccal surfaces of all the teeth.                                                 |

Table 4 Quality assessment based on the Newcastle-Ottawa Scale

## (A) Cohort study

| Study Author                        | Selection      |                   |                           |                     | Comparability | Outcome               |                     |                       | Total score |
|-------------------------------------|----------------|-------------------|---------------------------|---------------------|---------------|-----------------------|---------------------|-----------------------|-------------|
|                                     | Exposed cohort | Nonexposed cohort | Ascertainment of exposure | Outcome of interest |               | Assessment of outcome | Length of follow-up | Adequacy of follow-up |             |
| Barros <i>et al</i> <sup>14</sup>   | *              | *                 | *                         | ...                 | ...           | *                     | *                   | *                     | 6           |
| Takeuchi <i>et al</i> <sup>19</sup> | *              | *                 | *                         | *                   | ...           | *                     | *                   | *                     | 7           |
| Gian <i>et al</i> <sup>13</sup>     | ...            | *                 | *                         | ...                 | ...           | *                     | *                   | ...                   | 4           |

## (B) Case-control / cross-sectional study

| Study Author                               | Selection       |                                 |                   |                    | Comparability | Outcome                   |                                                     |                   | Total score |
|--------------------------------------------|-----------------|---------------------------------|-------------------|--------------------|---------------|---------------------------|-----------------------------------------------------|-------------------|-------------|
|                                            | Case definition | Representativeness of the cases | Control selection | Control definition |               | Ascertainment of exposure | Same method of ascertainment for cases and controls | Non-response rate |             |
| Hayes <i>et al</i> <sup>1</sup>            | *               | ...                             | *                 | *                  | *             | *                         | *                                                   | *                 | 7           |
| Scannapieco <i>et al</i> <sup>2</sup>      | ...             | *                               | *                 | *                  | ...           | *                         | *                                                   | ...               | 5           |
| Garcia <i>et al</i> <sup>3</sup>           | *               | ...                             | *                 | *                  | *             | *                         | *                                                   | *                 | 7           |
| Scannapieco <i>et al</i> <sup>15</sup>     | ...             | *                               | *                 | *                  | ...           | *                         | *                                                   | *                 | 6           |
| Hyman <i>et al</i> <sup>16</sup>           | *               | *                               | *                 | *                  | ...           | *                         | *                                                   | *                 | 7           |
| Leuckfeld <i>et al</i> <sup>4</sup>        | *               | ...                             | ...               | *                  | ...           | *                         | *                                                   | *                 | 5           |
| Wang <i>et al</i> <sup>6</sup>             | *               | *                               | ...               | *                  | *             | *                         | *                                                   | *                 | 7           |
| Liu <i>et al</i> <sup>5</sup>              | *               | *                               | ...               | *                  | *             | *                         | *                                                   | *                 | 7           |
| Si <i>et al</i> <sup>7</sup>               | *               | *                               | ...               | *                  | *             | *                         | *                                                   | *                 | 7           |
| Zhou <i>et al</i> <sup>8</sup>             | *               | *                               | ...               | *                  | *             | *                         | *                                                   | *                 | 7           |
| Bedić <i>et al</i> <sup>9</sup>            | *               | *                               | ...               | *                  | *             | *                         | *                                                   | *                 | 7           |
| Chung <i>et al</i> <sup>17</sup>           | *               | *                               | *                 | *                  | ...           | *                         | *                                                   | *                 | 7           |
| AbdelHalim <i>et al</i> <sup>22</sup>      | *               | ...                             | ...               | *                  | ...           | *                         | *                                                   | *                 | 5           |
| Harland <i>et al</i> <sup>18</sup>         | *               | *                               | ...               | *                  | ...           | *                         | *                                                   | *                 | 6           |
| Lopez-de-Andrés <i>et al</i> <sup>10</sup> | ...             | *                               | *                 | *                  | *             | ...                       | *                                                   | *                 | 6           |
| Jung <i>et al</i> <sup>20</sup>            | ...             | *                               | *                 | *                  | ...           | *                         | *                                                   | *                 | 6           |
| Winning <i>et al</i> <sup>21</sup>         | *               | *                               | *                 | *                  | ...           | *                         | *                                                   | *                 | 7           |
| Zhou <i>et al</i> <sup>11</sup>            | *               | *                               | ...               | ...                | **            | *                         | *                                                   | *                 | 7           |
| Kataoka <i>et al</i> <sup>12</sup>         | *               | *                               | *                 | *                  | ...           | *                         | *                                                   | *                 | 7           |



**Figure 1 Sensitivity analysis on studies with larger sample size (N ≥500). Values more than one indicate a higher risk of COPD in patients with PD.**

1  
2  
3  
4  
5  
6  
7  
8  
9  
10  
11  
12  
13  
14  
15  
16  
17  
18  
19  
20  
21  
22  
23  
24  
25  
26  
27  
28  
29  
30  
31  
32  
33  
34  
35  
36  
37  
38  
39  
40  
41  
42  
43  
44  
45  
46  
47  
48  
49  
50  
51  
52  
53  
54  
55  
56  
57  
58  
59  
60

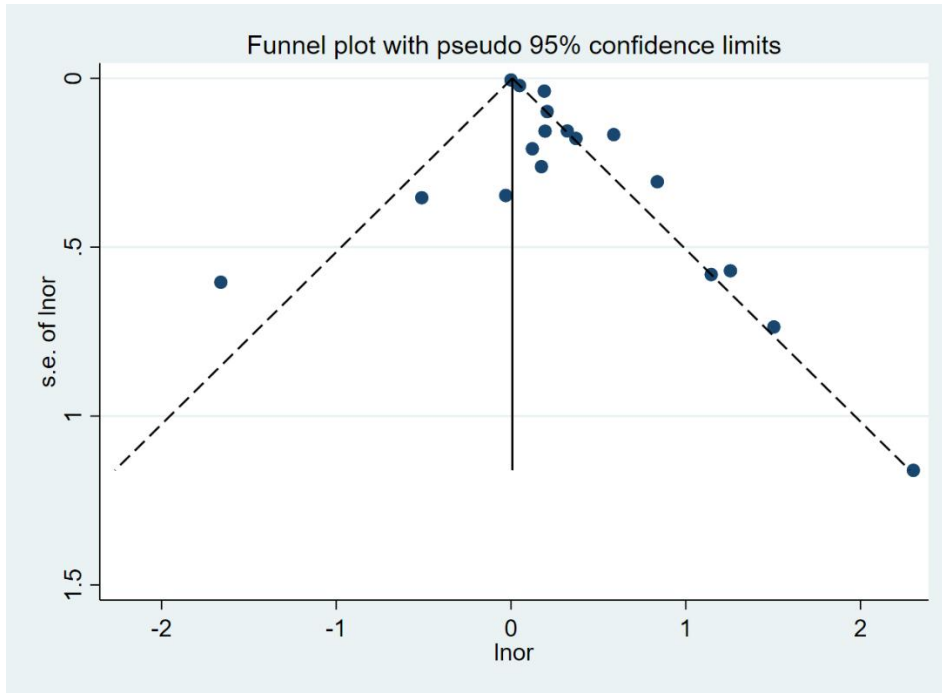

Figure 2 Funnel plot for the risk of COPD, with pseudo 95% confidence limits.

Peer review only

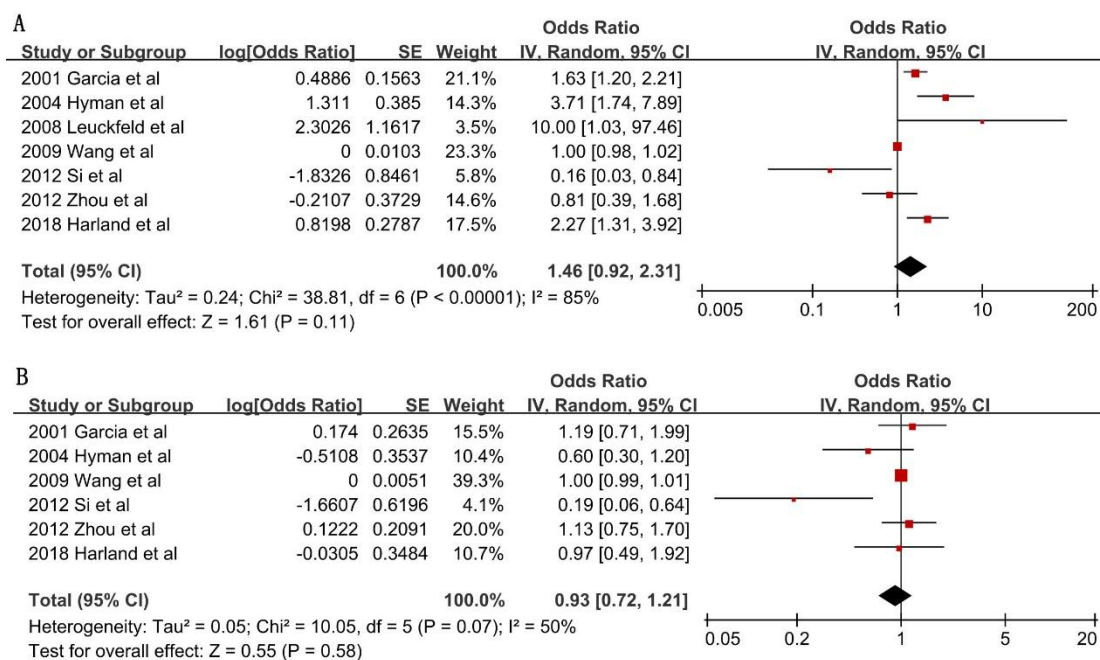

**Figure 3 Forest plot of the risk of COPD by periodontal disease. A in smokers and B in never smokers. Values more than one indicate a higher risk in patients with periodontal disease.**

## References

1. Hayes C, Sparrow D, Cohen M, *et al.* The association between alveolar bone loss and pulmonary function: the VA Dental Longitudinal Study. *Ann Periodontol* 1998;3:257-261.
2. Scannapieco FA, Papandonatos GD, Dunford RG. Associations between oral conditions and respiratory disease in a national sample survey population. *Ann Periodontol* 1998;3:251-256.
3. Garcia RI, Nunn ME, Vokonas PS. Epidemiologic associations between periodontal disease and chronic obstructive pulmonary disease. *Ann Periodontol* 2001;6:71-77.
4. Leuckfeld I, Obregon-Whittle MV, Lund MB, *et al.* Severe chronic obstructive pulmonary disease: association with marginal bone loss in periodontitis. *Respir Med* 2008;102:488-494.
5. Liu Z, Zhang W, Zhang J, *et al.* Oral hygiene, periodontal health and chronic obstructive pulmonary disease exacerbations. *J Clin Periodontol* 2012;39:45-52.
6. Wang Z, Zhou X, Zhang J, *et al.* Periodontal health, oral health behaviours, and chronic obstructive pulmonary disease. *J Clin Periodontol* 2009;36:750-755.
7. Si Y, Fan H, Song Y, *et al.* Association between periodontitis and chronic obstructive pulmonary disease in a Chinese population. *J Periodontol* 2012;83:1288-1296.
8. Zhou X, Han J, Song Y, *et al.* Serum levels of 25-hydroxyvitamin D, oral health and chronic obstructive pulmonary disease. *J Clin Periodontol* 2012;39:350-356.
9. Ledić K, Marinković S, Puhar I, *et al.* Periodontal disease increases risk for chronic obstructive pulmonary disease. *Coll Antropol* 2013;37:937-942.
10. Lopez-de-Andrés A, Vazquez-Vazquez L, Martinez-Huedo MA, *et al.* Is COPD associated with periodontal disease? A population-based study in Spain. *Int J Chron Obstruct Pulmon Dis* 2018;13:3435-3445.
11. Zhou X, Wang J, Liu W, *et al.* Periodontal Status and Microbiologic Pathogens in Patients with Chronic Obstructive Pulmonary Disease and Periodontitis: A Case-Control Study. *Int J Chron Obstruct Pulmon Dis* 2020;15:2071-2079.
12. Kataoka S, Kimura M, Yamaguchi T, *et al.* A cross-sectional study of relationships between periodontal disease and general health: The Hitachi Oral Healthcare Survey. *BMC Oral Health* 2021;21:644.
13. Qian Y, Yuan W, Mei N, *et al.* Periodontitis increases the risk of respiratory

- 1  
2  
3  
4  
5  
6  
7  
8  
9  
10  
11  
12  
13  
14  
15  
16  
17  
18  
19  
20  
21  
22  
23  
24  
25  
26  
27  
28  
29  
30  
31  
32  
33  
34  
35  
36  
37  
38  
39  
40  
41  
42  
43  
44  
45  
46  
47  
48  
49  
50  
51  
52  
53  
54  
55  
56  
57  
58  
59  
60
- disease mortality in older patients. *Exp Gerontol* 2020;133:110878.
14. Barros SP, Suruki R, Loewy ZG, *et al.* A cohort study of the impact of tooth loss and periodontal disease on respiratory events among COPD subjects: modulatory role of systemic biomarkers of inflammation. *PLoS One* 2013;8:e68592.
15. Scannapieco FA, Ho AW. Potential associations between chronic respiratory disease and periodontal disease: analysis of National Health and Nutrition Examination Survey III. *J Periodontol* 2001;72:50-56.
16. Hyman JJ, Reid BC. Cigarette smoking, periodontal disease: and chronic obstructive pulmonary disease. *J Periodontol* 2004;75:9-15.
17. Chung JH, Hwang HJ, Kim SH, *et al.* Associations Between Periodontitis and Chronic Obstructive Pulmonary Disease: The 2010 to 2012 Korean National Health and Nutrition Examination Survey. *J Periodontol* 2016;87:864-871.
18. Harland J, Furuta M, Takeuchi K, *et al.* Periodontitis modifies the association between smoking and chronic obstructive pulmonary disease in Japanese men. *J Oral Sci* 2018;60:226-231.
19. Takeuchi K, Matsumoto K, Furuta M, *et al.* Periodontitis Is Associated with Chronic Obstructive Pulmonary Disease. *J Dent Res* 2019;98:534-540.
20. Jung ES, Lee KH, Choi YY. Association between oral health status and chronic obstructive pulmonary disease in Korean adults. *Int Dent J* 2020;70:208-213.
21. Winning L, Polyzois I, Sanmartin Berglund J, *et al.* Periodontitis and airflow limitation in older Swedish individuals. *J Clin Periodontol* 2020;47:715-725.
22. Abdelhalim H, Aboelnaga H, Aggour R. Chronic obstructive pulmonary disease exacerbations and periodontitis: a possible association. *Egyptian Journal of Bronchology* 2018;12.



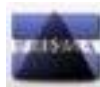

## PRISMA 2009 Checklist

| Section/topic             | Item No | Checklist item                                                                                                                                                                                                                                                                                              | Reported on Page Number/Line Number | Reported on Section/Paragraph                 |
|---------------------------|---------|-------------------------------------------------------------------------------------------------------------------------------------------------------------------------------------------------------------------------------------------------------------------------------------------------------------|-------------------------------------|-----------------------------------------------|
| <b>TITLE</b>              |         |                                                                                                                                                                                                                                                                                                             |                                     |                                               |
| Title                     | 1       | Identify the report as a systematic review, meta-analysis, or both.                                                                                                                                                                                                                                         | Page 1 / Line 2,3                   | Title page                                    |
| <b>ABSTRACT</b>           |         |                                                                                                                                                                                                                                                                                                             |                                     |                                               |
| Structured summary        | 2       | Provide a structured summary including, as applicable: background; objectives; data sources; study eligibility criteria, participants, and interventions; study appraisal and synthesis methods; results; limitations; conclusions and implications of key findings; systematic review registration number. | Page 2,3 / Line 28-52               | Abstract                                      |
| <b>INTRODUCTION</b>       |         |                                                                                                                                                                                                                                                                                                             |                                     |                                               |
| Rationale                 | 3       | Describe the rationale for the review in the context of what is already known.                                                                                                                                                                                                                              | Page 3-5 / Line 66-100              | Introduction / Paragraph 1-4                  |
| Objectives                | 4       | Provide an explicit statement of questions being addressed with reference to participants, interventions, comparisons, outcomes, and study design (PICOS).                                                                                                                                                  | Page 5 / Line 100-104               | Introduction / Paragraph 4                    |
| <b>METHODS</b>            |         |                                                                                                                                                                                                                                                                                                             |                                     |                                               |
| Protocol and registration | 5       | Indicate if a review protocol exists, if and where it can be accessed (e.g., Web address), and, if available, provide registration information including registration number.                                                                                                                               | Page 5 / Line 107-109               | Methods / Paragraph 1                         |
| Eligibility criteria      | 6       | Specify study characteristics (e.g., PICOS, length of follow-up) and report characteristics (e.g., years considered, language, publication status) used as criteria for eligibility, giving rationale.                                                                                                      | Page 6 / Line 116-122               | Methods / Paragraph 2                         |
| Information sources       | 7       | Describe all information sources (e.g., databases with dates of coverage, contact with study authors to identify additional studies) in the search and date last searched.                                                                                                                                  | Page 6 / Line 112-114               | Methods / Paragraph 2                         |
| Search                    | 8       | Present full electronic search strategy for at least one database, including any limits used, such that it could be repeated.                                                                                                                                                                               | Page 6 / Line 114-116               | Methods / Paragraph 2<br>Supplemental table 1 |
| Study selection           | 9       | State the process for selecting studies (i.e., screening, eligibility, included in systematic review, and, if applicable, included in the meta-analysis).                                                                                                                                                   | Page 6 / Line 125-131               | Methods / Paragraph 3                         |
| Data collection process   | 10      | Describe method of data extraction from reports (e.g., piloted forms, independently, in duplicate) and any processes for obtaining and confirming data from investigators.                                                                                                                                  | Page 7 / Line 134,135               | Methods / Paragraph 4                         |
| Data items                | 11      | List and define all variables for which data were sought (e.g., PICOS, funding sources) and any assumptions and simplifications made.                                                                                                                                                                       | Page 7 / Line 135-140               | Methods / Paragraph 4                         |

|                                    |    |                                                                                                                                                                                                                        |                                                      |                                              |
|------------------------------------|----|------------------------------------------------------------------------------------------------------------------------------------------------------------------------------------------------------------------------|------------------------------------------------------|----------------------------------------------|
| Risk of bias in individual studies | 12 | Describe methods used for assessing risk of bias of individual studies (including specification of whether this was done at the study or outcome level), and how this information is to be used in any data synthesis. | Page 7 / Line 141-147                                | Methods / Paragraph 4                        |
| Summary measures                   | 13 | State the principal summary measures (e.g., risk ratio, difference in means).                                                                                                                                          | Page 7 / Line 150                                    | Methods / Paragraph 5                        |
| Synthesis of results               | 14 | Describe the methods of handling data and combining results of studies, if done, including measures of consistency (e.g., I <sup>2</sup> ) for each meta-analysis.                                                     | Page 8 / Line 156-160                                | Methods / Paragraph 5                        |
| Risk of bias across studies        | 15 | Specify any assessment of risk of bias that may affect the cumulative evidence (e.g., publication bias, selective reporting within studies).                                                                           | Page 8 / Line 172, 173                               | Methods / Paragraph 7                        |
| Additional analyses                | 16 | Describe methods of additional analyses (e.g., sensitivity or subgroup analyses, meta-regression), if done, indicating which were pre-specified.                                                                       | Page 8 / Line 161-172                                | Methods / Paragraph 6,7                      |
| <b>RESULTS</b>                     |    |                                                                                                                                                                                                                        |                                                      |                                              |
| Study selection                    | 17 | Give numbers of studies screened, assessed for eligibility, and included in the review, with reasons for exclusions at each stage, ideally with a flow diagram.                                                        | Page 9 / Line 183-189                                | Results / Paragraph 1; Figure 1              |
| Study characteristics              | 18 | For each study, present characteristics for which data were extracted (e.g., study size, PICOS, follow-up period) and provide the citations.                                                                           | Page 9-12 / Line 190-226                             | Results / Paragraph 2-4; Table 1             |
| Risk of bias within studies        | 19 | Present data on risk of bias of each study and, if available, any outcome level assessment (see item 12).                                                                                                              | Page 12 / Line 229-234                               | Results / Paragraph 5; Supplemental table 3  |
| Results of individual studies      | 20 | For all outcomes considered (benefits or harms), present, for each study: (a) simple summary data for each intervention group (b) effect estimates and confidence intervals, ideally with a forest plot.               | Page 12 / Line 239;<br>Page 15 / Line 277            | Results / Paragraph 6, 9; Figure 2 and 3     |
| Synthesis of results               | 21 | Present results of each meta-analysis done, including confidence intervals and measures of consistency.                                                                                                                | Page 12 / Line 237-239<br>Page 15 / Line 275-277     | Results / Paragraph 6,9; Figure 2 and 3      |
| Risk of bias across studies        | 22 | Present results of any assessment of risk of bias across studies (see Item 15).                                                                                                                                        | Page 13 / Line 244-246                               | Results / Paragraph 6; Supplemental figure 2 |
| Additional analysis                | 23 | Give results of additional analyses, if done (e.g., sensitivity or subgroup analyses, meta-regression [see Item 16]).                                                                                                  | Page 12 / Line 240-243;<br>Page 13-15 / Line 247-270 | Results / Paragraph 6-8; Table 2, Figure 2   |
| <b>DISCUSSION</b>                  |    |                                                                                                                                                                                                                        |                                                      |                                              |
| Summary of evidence                | 24 | Summarize the main findings including the strength of evidence for each main outcome; consider their relevance to key groups (e.g., healthcare providers, users, and policy makers).                                   | Page 15-18 / Line 280-346                            | Discussion / Paragraph 1-5                   |
| Limitations                        | 25 | Discuss limitations at study and outcome level (e.g., risk of bias), and at review-level (e.g., incomplete retrieval of identified research, reporting bias).                                                          | Page 18,19 / Line 349-368                            | Discussion / Paragraph 6                     |
| Conclusions                        | 26 | Provide a general interpretation of the results in the context of other evidence, and implications for future research.                                                                                                | Page 19 / Line 371-375                               | Conclusion / Paragraph 1                     |

1  
2  
3  
4  
5  
6  
7  
8  
9  
10  
11  
12  
13  
14  
15  
16  
17  
18  
19  
20  
21  
22  
23  
24  
25  
26  
27  
28  
29  
30  
31  
32  
33  
34  
35  
36  
37  
38  
39  
40  
41  
42  
43  
44  
45  
46

|                |    |                                                                                                                                            |                        |         |
|----------------|----|--------------------------------------------------------------------------------------------------------------------------------------------|------------------------|---------|
| <b>FUNDING</b> |    |                                                                                                                                            |                        |         |
| Funding        | 27 | Describe sources of funding for the systematic review and other support (e.g., supply of data); role of funders for the systematic review. | Page 20 / Line 391,392 | Funding |

**From:** Moher D, Liberati A, Tetzlaff J, Altman DG, The PRISMA Group (2009). Preferred Reporting Items for Systematic Reviews and Meta-Analyses: The PRISMA Statement. PLoS Med 6(7): e1000097. doi:10.1371/journal.pmed1000097

For more information, visit: [www.prisma-statement.org](http://www.prisma-statement.org).

Please leave this space alone as it will be supplemented by the editorial office when needed.

For peer review only
